# Supplementary material
Source: ML conference proceedings conference paper supplement (https://www.ecva.net/papers/eccv_2020/papers_ECCV/html/123550052_ECCV_2020_paper.php)
Supplement: Supplementary file 1 [file 123550052-supp.zip]

# Supplementary Material for Linguistic Structure Guided Context Modeling for Referring Image Segmentation

Anonymous ECCV submission

Paper ID 986

## 1 Reproducibility

We provide code of our LSCM model in the folder named *code\_of\_lscm* which is under the same directory as this PDF file.

## 2 Mutan Fusion

Our model takes an image and a referring expression with  $T$  words as input. We use a CNN backbone and a LSTM [2] to extract visual feature  $V_i \in \mathbb{R}^{H \times W \times C_v}$ ,  $i \in \{2, 3, 4, 5\}$  corresponding to different stages in CNN, and words features  $Q \in \mathbb{R}^{T \times C_l}$ . Since we conduct the same operations on each level of the visual features, we use  $V$  to denote a single level of them for ease of presentation. We also use an 8D spatial coordinate feature [4] denoted as  $P \in \mathbb{R}^{H \times W \times 8}$ . The simplified Mutan fusion [1] which we adopt to fuse  $\{V, Q, P\}$  is conducted as follows:

$$\tilde{V} = \text{Conv}([V, P]), \quad (1)$$

$$L = \text{MaxPool}(Q), \quad (2)$$

$$M_j = (LW_{1j}) \odot (\tilde{V}W_{2j}), \quad (3)$$

$$M = \sum_{j=1}^r M_j, \quad (4)$$

where  $[,]$  denotes concatenation operation,  $W_{1j} \in \mathbb{R}^{C_l \times C_h}$ ,  $W_{2j} \in \mathbb{R}^{C_v \times C_h}$  are learnable parameters,  $\odot$  denotes elementwise multiplication,  $r$  is a hyperparameter set as 5 in our experiments,  $M \in \mathbb{R}^{H \times W \times C_h}$  is the output multimodal feature.

## 3 Qualitative Results

Qualitative results of our model on four benchmark datasets including UNC [6], UNC+ [6], G-Ref [5] and ReferIt [3] are illustrated in Fig. 1. Our model can well generalize to multiple datasets with different characteristics such as length of expression and entity categories.

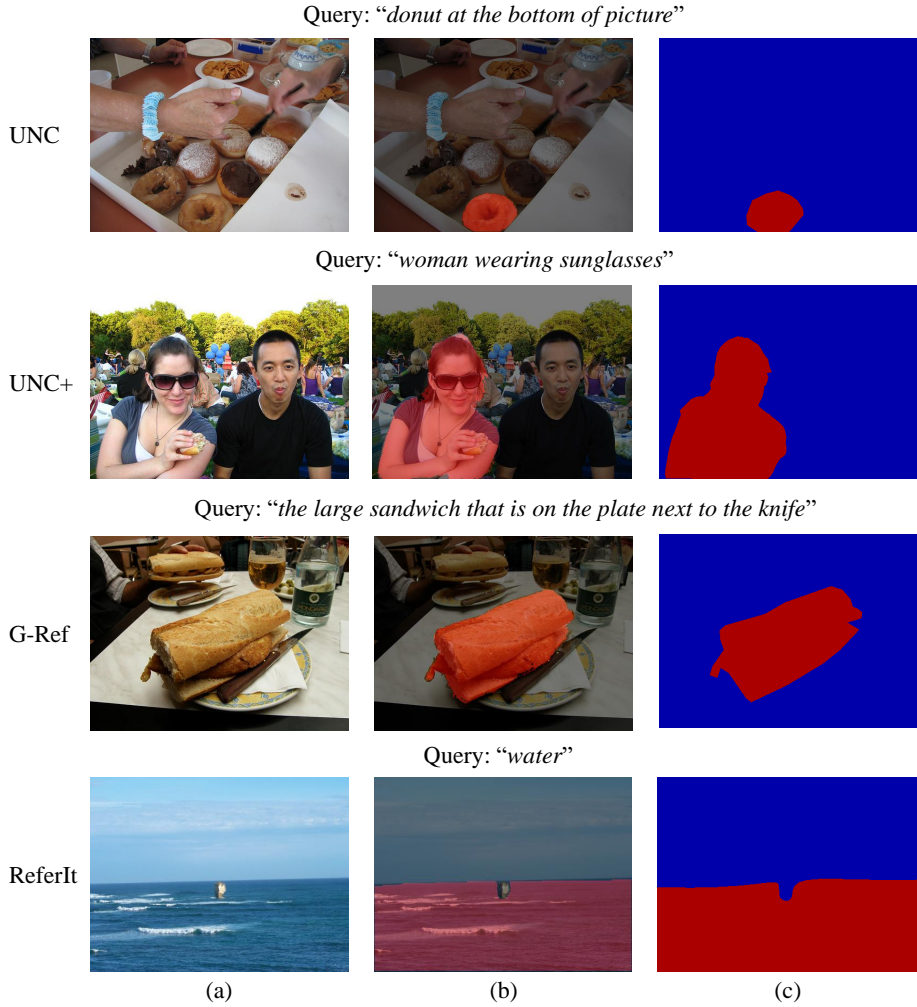

**Fig. 1.** Qualitative results of our model on four benchmark datasets. (a) Original image. (b) Prediction of our model. (c) Ground-truth.

## References

1. Ben-Younes, H., Cadene, R., Cord, M., Thome, N.: Mutan: Multimodal tucker fusion for visual question answering. In: ICCV (2017)
2. Hochreiter, S., Schmidhuber, J.: Long short-term memory. *Neural Computation* (1997)
3. Kazemzadeh, S., Ordonez, V., Matten, M., Berg, T.: Referitgame: Referring to objects in photographs of natural scenes. In: EMNLP (2014)
4. Liu, C., Lin, Z., Shen, X., Yang, J., Lu, X., Yuille, A.: Recurrent multimodal interaction for referring image segmentation. In: ICCV (2017)
5. Mao, J., Huang, J., Toshev, A., Camburu, O., Yuille, A.L., Murphy, K.: Generation and comprehension of unambiguous object descriptions. In: CVPR (2016)
6. Yu, L., Poirson, P., Yang, S., Berg, A.C., Berg, T.L.: Modeling context in referring expressions. In: ECCV (2016)
