# Supplementary material
Source: ML conference proceedings conference paper supplement (https://www.ecva.net/papers/eccv_2020/papers_ECCV/html/123550052_ECCV_2020_paper.php)
Supplement: Supplementary file 4 [file 123550052-supp.zip]

Archive with 51 entries (47 files):
- code_of_lscm/
- __MACOSX/._code_of_lscm
- code_of_lscm/util/
- __MACOSX/code_of_lscm/._util
- code_of_lscm/LSCM_model_p2345.py
- __MACOSX/code_of_lscm/._LSCM_model_p2345.py
- code_of_lscm/run.sh
- __MACOSX/code_of_lscm/._run.sh
- code_of_lscm/build_batches.py
- __MACOSX/code_of_lscm/._build_batches.py
- code_of_lscm/trainval_model.py
- __MACOSX/code_of_lscm/._trainval_model.py
- code_of_lscm/scripts/
- __MACOSX/code_of_lscm/._scripts
- code_of_lscm/data/
- __MACOSX/code_of_lscm/._data
- code_of_lscm/README.pdf
- __MACOSX/code_of_lscm/._README.pdf
- code_of_lscm/util/functions.py
- __MACOSX/code_of_lscm/util/._functions.py
- code_of_lscm/util/im_processing.py
- __MACOSX/code_of_lscm/util/._im_processing.py
- code_of_lscm/util/eval_tools.py
- __MACOSX/code_of_lscm/util/._eval_tools.py
- code_of_lscm/util/nms.pyx
- __MACOSX/code_of_lscm/util/._nms.pyx
- code_of_lscm/util/cell.py
- __MACOSX/code_of_lscm/util/._cell.py
- code_of_lscm/util/text_processing.py
- __MACOSX/code_of_lscm/util/._text_processing.py
- code_of_lscm/util/io.py
- __MACOSX/code_of_lscm/util/._io.py
- code_of_lscm/util/__init__.py
- __MACOSX/code_of_lscm/util/.___init__.py
- code_of_lscm/util/data_reader.py
- __MACOSX/code_of_lscm/util/._data_reader.py
- code_of_lscm/util/loss.py
- __MACOSX/code_of_lscm/util/._loss.py
- code_of_lscm/util/processing_tools.py
- __MACOSX/code_of_lscm/util/._processing_tools.py
- code_of_lscm/util/vgg16_fcn.py
- __MACOSX/code_of_lscm/util/._vgg16_fcn.py
- code_of_lscm/scripts/embedding_generate.py
- __MACOSX/code_of_lscm/scripts/._embedding_generate.py
- code_of_lscm/data/vocabulary_token_referit.txt
- __MACOSX/code_of_lscm/data/._vocabulary_token_referit.txt
- code_of_lscm/data/.DS_Store
- __MACOSX/code_of_lscm/data/._.DS_Store
- code_of_lscm/data/vocabulary_token_Gref.txt
- __MACOSX/code_of_lscm/data/._vocabulary_token_Gref.txt
- doc_of_lscm.pdf
