# Supplementary material
Source: ML conference proceedings conference paper supplement (https://www.ecva.net/papers/eccv_2020/papers_ECCV/html/123550052_ECCV_2020_paper.php)
Supplement: Supplementary file 4 [file 123550052-supp.zip › code_of_lscm/build_batches.py]

import sys
sys.path.append('./external/coco/PythonAPI')
import os
import argparse
import numpy as np
import json
import skimage
import skimage.io

from util import im_processing, text_processing
from util.io import load_referit_gt_mask as load_gt_mask
from refer import REFER
from pycocotools import mask as cocomask
import re
import spacy


def build_referit_batches(setname, T, input_H, input_W):
    # data directory
    im_dir = './data/referit/images/'
    mask_dir = './data/referit/mask/'
    query_file = './data/referit_query_' + setname + '.json'
    vocab_file = './data/vocabulary_referit.txt'

    # saving directory
    data_folder = './referit/' + setname + '_batch/'
    data_prefix = 'referit_' + setname
    if not os.path.isdir(data_folder):
        os.makedirs(data_folder)

    # load annotations
    query_dict = json.load(open(query_file))
    im_list = query_dict.keys()
    vocab_dict = text_processing.load_vocab_dict_from_file(vocab_file)

    # collect training samples
    samples = []
    for n_im, name in enumerate(im_list):
        im_name = name.split('_', 1)[0] + '.jpg'
        mask_name = name + '.mat'
        for sent in query_dict[name]:
            samples.append((im_name, mask_name, sent))

    # save batches to disk
    # spacy load
    nlp = spacy.load("en_core_web_sm")
    SENTENCE_SPLIT_REGEX = re.compile(r'(\W+)')
    num_batch = len(samples)
    valid = 0
    for n_batch in range(num_batch):
        print('saving batch %d / %d' % (n_batch + 1, num_batch))
        im_name, mask_name, sent = samples[n_batch]
        im = skimage.io.imread(im_dir + im_name)
        mask = load_gt_mask(mask_dir + mask_name).astype(np.float32)

        if 'train' in setname:
            im = skimage.img_as_ubyte(im_processing.resize_and_pad(im, input_H, input_W))
            mask = im_processing.resize_and_pad(mask, input_H, input_W)
        if im.ndim == 2:
            im = np.tile(im[:, :, np.newaxis], (1, 1, 3))

        sent = sent.lower()
        words = SENTENCE_SPLIT_REGEX.split(sent.strip())
        words = [w for w in words if len(w.strip()) > 0]
        # remove .
        if words[-1] == '.':
            words = words[:-1]
        if len(words) > 20:
            words = words[:20]
        n_sent = ""
        for w in words:
            n_sent = n_sent + w + ' '
        n_sent = n_sent.strip()
        try:
            n_sent = n_sent.decode("utf-8")
        except UnicodeEncodeError:
            continue
        doc = nlp(n_sent)
        if (len(doc) > 30):
            continue

        text, graph, height = text_processing.preprocess_spacy_sentence(doc, vocab_dict, T)

        np.savez(file=data_folder + data_prefix + '_' + str(valid) + '.npz',
                 text_batch=text,
                 im_batch=im,
                 mask_batch=(mask > 0),
                 sent_batch=[n_sent],
                 graph_batch=graph,
                 height_batch=np.array([height], dtype=np.int32))
        valid += 1


def build_coco_batches(dataset, setname, T, input_H, input_W):
    im_dir = './data/coco/images'
    im_type = 'train2014'
    vocab_file = './data/vocabulary_token_Gref.txt'

    data_folder = './' + dataset + '/' + setname + '_batch/'
    data_prefix = dataset + '_' + setname
    if not os.path.isdir(data_folder):
        os.makedirs(data_folder)

    print("data_folder:", data_folder)

    if dataset == 'Gref':
        refer = REFER('./external/refer/data', dataset = 'refcocog', splitBy = 'google')
    elif dataset == 'unc':
        refer = REFER('./external/refer/data', dataset = 'refcoco', splitBy = 'unc')
    elif dataset == 'unc+':
        refer = REFER('./external/refer/data', dataset = 'refcoco+', splitBy = 'unc')
    else:
        raise ValueError('Unknown dataset %s' % dataset)
    refs = [refer.Refs[ref_id] for ref_id in refer.Refs if refer.Refs[ref_id]['split'] == setname]
    vocab_dict = text_processing.load_vocab_dict_from_file(vocab_file)

    n_batch = 0

    # spacy load
    nlp = spacy.load("en_core_web_sm")
    SENTENCE_SPLIT_REGEX = re.compile(r'(\W+)')

    for ref in refs:
        im_name = 'COCO_' + im_type + '_' + str(ref['image_id']).zfill(12)
        im = skimage.io.imread('%s/%s/%s.jpg' % (im_dir, im_type, im_name))
        seg = refer.Anns[ref['ann_id']]['segmentation']
        rle = cocomask.frPyObjects(seg, im.shape[0], im.shape[1])
        mask = np.max(cocomask.decode(rle), axis = 2).astype(np.float32)

        if 'train' in setname:
            im = skimage.img_as_ubyte(im_processing.resize_and_pad(im, input_H, input_W))
            mask = im_processing.resize_and_pad(mask, input_H, input_W)
        if im.ndim == 2:
            im = np.tile(im[:, :, np.newaxis], (1, 1, 3))

        for sentence in ref['sentences']:
            print('saving batch %d' % (n_batch + 1))
            sent = sentence['sent'].lower()
            words = SENTENCE_SPLIT_REGEX.split(sent.strip())
            words = [w for w in words if len(w.strip()) > 0]
            # remove .
            if words[-1] == '.':
                words = words[:-1]
            if len(words) > 20:
                words = words[:20]
            n_sent = ""
            for w in words:
                n_sent = n_sent + w +' '
            n_sent = n_sent.strip()
            try:
                n_sent = n_sent.decode("utf-8")
            except UnicodeEncodeError:
                continue
            doc = nlp(n_sent)
            if (len(doc) > 30):
                continue

            n_sent = n_sent.decode("utf-8")
            doc = nlp(n_sent)
            text, graph, height = text_processing.preprocess_spacy_sentence(doc, vocab_dict, T)

            np.savez(file = data_folder + data_prefix + '_' + str(n_batch) + '.npz',
                text_batch = text,
                im_batch = im,
                mask_batch = (mask > 0),
                sent_batch = [n_sent],
                graph_batch = graph,
                height_batch = np.array([height], dtype=np.int32))
            n_batch += 1


if __name__ == "__main__":
    parser = argparse.ArgumentParser()
    parser.add_argument('-d', type = str, default = 'referit') # 'unc', 'unc+', 'Gref'
    parser.add_argument('-t', type = str, default = 'trainval') # 'train', val', 'testA', 'testB'

    args = parser.parse_args()
    T = 30
    input_H = 320
    input_W = 320
    if args.d == 'referit':
        build_referit_batches(setname = args.t,
            T = T, input_H = input_H, input_W = input_W)
    else:
        build_coco_batches(dataset = args.d, setname = args.t,
            T = T, input_H = input_H, input_W = input_W)
