# Supplementary material
Source: ML conference proceedings conference paper supplement (https://www.ecva.net/papers/eccv_2020/papers_ECCV/html/123550052_ECCV_2020_paper.php)
Supplement: Supplementary file 4 [file 123550052-supp.zip › code_of_lscm/data/vocabulary_token_Gref.txt]

<pad>
<go>
<eos>
<unk>
raining
writings
decrotaive
4301
beqd
yellos
yellor
yellow
four
neckties
croutched
woods
dispensers
spiders
hanginf
hanging
woody
cassarole
yelloe
marching
sevens
increase
canes
humming
unblocked
electricity
reclingin
sunlit
prosperring
shurt
speckels
hilighter
lori
lord
flicking
depiction
shaving
sinking
mozarella
swivel
callin
lemondade
soinning
stright
honking
propane
delk
inall
dell
dels
figs
tomote
stabbed
farest
screaming
flys
bsecond
wooded
moldings
woodeb
prize
broiler
wooden
closly
voyeur
satchel
usq
dreds
frizbee
crotch
succession
zzzzzz
tyable
leftgirl
fritter
ornamental
secont
daybed
tired
corvette
miller
railing
sailer
bonbon
ngel
969
seconf
bannister
second
crisply
valiant
277
manner
shrugging
scraped
snuggled
reland
glasse
blouse
brocolie
keyboarad
fingerz
semicircular
rowboats
comically
006
cooking
brocolii
12oclock
zibera
passed
designing
sneering
numeral
groupie
admiral
sufer
submerged
dort
elephabt
hero
leaninf
peppercorns
reporter
herb
nonwhite
lightbright
grounf
whiteish
here
herd
chine
triagle
ching
chassis
dora
atomi
grooves
hers
mcenter
motorolla
dork
extened
quwi
kids
kidt
leftlooking
k
controler
empyy
brunett
qantas
kidd
kidf
skeate
lade
military
pullin
spotty
climber
blafrican
golden
crunut
projection
txi
drye
bikinitop
argo
hamar
orangish
brought
marina
unix
surgent
schwing
stern
caoch
cocaine
acrobatically
unit
mote
cheating
dna
portugal
geisha
marine
glimmering
ithe
sidebars
occupying
dnt
kettles
catche
arangement
passport
nealing
strike
until
galss
diswasher
miidle
pinguin
females
tomatoesin
holy
relax
brings
looker
trousers
yahoo
hurt
99
glass
exce
harmless
tying
thinkpad
91
foregrounds
hole
hold
95
94
troegs
96
racial
leaper
thegreenboard
locked
biplane
begiing
blade
swishing
phant
locker
farleft
headquarters
longways
sweeter
yup
posterior
banaaa
plunger
brcccolui
scavenge
matilda
747
melons
wana
sittting
wand
rodeoing
beautifully
organized
scarrf
flagstone
pooper
omelete
tortillas
smth
want
lerger
shielding
pinto
sharpie
cakey
absolute
hog
fuzzed
hoe
hob
parralel
rightone
turn
vox
travel
drying
butterflies
leaguers
voy
machine
how
hot
hor
monroe
girage
vehicale
umreb
ronnie
garments
gaming
1174
beauty
fliwn
bckpck
typed
sippy
prepaing
bodyless
diagram
plyr
wrong
multicol
hatchpack
destined
charleston
curvier
dough
liuid
promotion
types
typer
chandov
colorfully
ballroom
calves
headphones
youths
happyish
laotop
baggage
elephent
specks
hores
keeps
chandon
buggie
1000
wing
overhauls
wine
tableclothes
sprawling
htodog
shanghai
dornut
vary
skinnest
pottie
rigjy
jorda
handcuff
bubbles
ewe
ctacher
diagonally
rigjt
welcomes
fir
foregroound
lovingly
abou
fit
directional
werid
fix
ndpiper
clutches
bewteen
bulding
conner
chilifries
budweiser
hidden
bocolli
fin
easier
2032
tippy
townshio
baaby
duvet
colset
topbat
slate
seafoam
enrico
latop
slicing
ostritch
628
urmn
xd
cyckle
aready
lefvt
parasols
slats
silver
headboard
barstoolwith
closedt
higjlh
cner
blushes
guage
umrella
sloped
buttonhole
unsheared
arrow
smallar
buckteeth
graced
phat
cak
luann
yeellow
spidey
  
garment
virtical
blinder
bornw
bowls
commons
sencon
wassles
391
grapefruits
turnip
396
395
394
garbed
cathedral
whit
bowlf
whir
message
whip
rt
rv
sjhirt
rs
smirk
buttonup
rx
homoeroticism
bancha
mason
rd
re
rf
at2
ra
rb
bonded
rm
plushy
ro
zirraf
ri
at8
vehical
middke
squashed
39a
hairbows
dracula
greenish
piizza
pumpkins
blacklaptop
standiing
checked
returning
withno
knit
greenise
thwe
topleft
speedo
ate
whote
birdie
eared
shelves
atm
ehat
viewing
scruff
atv
spindle
musicians
speedy
eatting
bannanas
1970s
chiars
pissa
lifejacket
shacking
token
stripe
orance
oorange
abpve
goggle
veggie
sighseeing
wash
spinning
chevron
wasn
hear
175
veggis
5the
palced
bitten
roni
basketball
arrots
service
lego
lega
sisio
engagement
reuben
rone
guirl
master
focal
blossoms
glasss
chugging
architect
critter
hiya
legt
ront
danish
motoccycle
silverand
avatar
charter
eteing
cushions
bacon
snooty
whith
ads
ssticker
japanese
lathe
technique
camersa
corssing
kiddle
vsu996
tperson
longlseeve
sandwick
205
white
humjan
plushie
trek
skimmer
dudck
skatter
showed
secong
apella
handcuffs
tree
rusty
burriss
trey
idle
pclock
catcherboat
skitting
blackbag
joy
pidgon
eliphants
elephannnt
biffo
etihad
bells
blackhawks
sponsored
runner
boston
corne
nthe
paddles
paddler
volkeswagon
fartheres
shrubs
carroat
poundcake
cornr
longe
dozen
birght
pickl
absorber
grapeseed
elefphant
escalator
person
colourful
bleachers
trein
unriped
metallic
umon
causing
instructs
artichokes
doors
botttl
sleeveless
flags
grips
sleevews
crossbones
silmultanuesly
mittens
automobiles
zebras
keybpard
cheverolet
backback
doin
object
riught
rawrrr
victoria
secotion
soemone
mouth
letter
jumpin
retaining
expanse
macbook
jumpig
dirnk
gentle
dummy
singer
stupid
announcement
flowery
bunndle
foriegn
biottom
cami
juiice
camo
sockas
women
vinyl
ducker
panama
incomplete
1765
saying
rightmostperson
busicuit
bottomright
braising
reclined
tequila
unopened
fingers
padded
fennel
gauge
asia
ziraffe
recliner
reclines
touches
busy
clicked
comforted
shuffling
ment
menu
baday
crossways
blackscreen
mens
rico
bush
samsonite
touched
badae
protecter
rice
pickeles
mena
buse
plate
warmers
sside
cubic
fruite
champaign
waaaaaay
honda
rectanglur
foremost
pocket
bicyicle
platw
cushion
new
toungue
thingys
kork
relish
donnut
layout
abbreviation
cleanng
tighty
blackfaced
greens
fiancee
nicely
tights
boarder
dipping
pretzel
ketween
patch
sauc
greend
eyelids
poff
piggy
basball
release
burris
greenn
boarded
charcol
granpa
bleu
blet
caravan
sorry4last
leasing
fair
whige
clydesdale
dricen
waterbottle
bkie
shoveling
drinkltop
pinot
pads
armavia
result
pallet
eleplants
duuuuuuude
ebra
hammer
bleh
best
oustretched
oceanic
cobra
suticase
lots
sombrero
deuce
shirted
gariff
stealthy
partition
stamps
score
irl
wakeboard
yogurt
enging
uhaul
charger
cubby
pirate
birdaa
skimpy
skimboard
claws
rfarthest
natura
cacther
extend
nature
snowbard
smelled
scratches
paddington
shirtand
openning
coiuch
loghter
sbottom
wtf
butane
wth
geraff
mirrowave
marines
roller
tolet
blending
midlde
welchs
planner
veep
stripoed
met
bachelorette
country
bogiraffe
puter
heating
askew
bodysuit
levitating
109
bigest
lookin
hated
bottomost
china
login
tinge
southeastern
schmooze
rfed
and
rightside
soory
unbuttoned
sheepdog
vail
advertisements
irresponsible
vaio
compuer
bblack
spead
2nd
guirls
102
girrafee
gleaming
rockies
27y
2ns
brindle
blonde
251
baskeball
grazing
254
signals
lighthouse
cardboard
marshmallows
mototcycle
chrome
seashell
tarts
fro
ofview
frm
.
twain
tallesy
2433
grapefruit
unicycle
chink
stadium
frt
lickicking
fry
airedale
tallest
kites
dots
ersi
life
nirain
gunon
hnds
eastern
stobart
certainly
skiis
skiir
worker
racquets
wish
spic
dota
substance
toboggan
chile
child
onyl
worked
straddles
unmelted
cum
chill
022
taper
castro
paraglider
contemplates
convertable
mates
tabke
appeals
prostrate
armband
elaborate
picturing
persn
climbed
718
project
played
rakcet
rihtmost
ans
dryleaf
079
playes
player
eve
broccol
biciycles
piercings
broccoi
poang
violin
doorman
blacfrisbeek
feed
hone
personholding
damaged
thingy
seashore
credit
things
toastes
toaster
doofus
windsor
darkbrown
laeftiest
thingi
split
babies
scotter
fisc
tortoiseshell
skateboards
european
elefant
boiled
flipflops
styling
kush
jkt
bib
tops
fibre
topp
brownpants
kittens
notepaper
cdl
refil
roman
talbe
airplanes
topf
tuna
closet
tung
altar
sqare
separte
steaming
monkeys
blemishes
burgers
husovama
croped
goofing
ornge
motoycycle
relaly
plaque
cakle
mddle
gigolo
lasst
letterman
sleeps
basine
mopad
sleepy
alpalfa
waterboard
shading
rright
blody
onhead
rushing
previous
hah
hai
handshake
spectacles
hal
ham
han
phillips
wihout
partlyin
had
haf
bis
hay
tront
femlae
easy
prison
duffel
har
east
hat
haw
humvees
cocked
municipal
seft
clouse
shadoe
wall
survival
thermometer
inverted
possible
browb
carying
possibly
rocket
giraffeonlef
wiht
birth
at4
miscellanious
shadow
stareing
bushy
d
sliced
cheezits
sohort
inquisitrive
impairment
stroller
alice
champ
tosted
hooed
easel
pavement
carcus
steps
meringue
follows
shipyard
sebastian
wieght
creen
warping
olb
right
old
righr
crowd
people
wearking
oli
crown
righy
policewoman
peoplr
crows
sure
sundress
minifridge
billboard
oly
boxtown
tobinco
creep
witth
fow
botton
ump
for
bottom
fox
talolest
creative
refridge
ruffles
fog
sra245
umb
umm
stingray
foo
completly
bottow
leftt
coller
shaker
shakes
leftp
cloest
lefts
fris
colley
barcode
lefty
imbrella
lefte
binder
marbel
furtherest
leftb
stylish
losing
bowing
lefto
officiating
spoke
secnd
aboard
benches
derailed
theleft
gaze
dollars
o
pillos
ccorner
seaplane
ratty
larish
hogodogo
slightly
motorcyclist
flatbread
paly
raised
gauze
rashguard
throwpillows
facility
leaflike
2b5775
elazquez
surounded
son
freshman
juicing
lugage
magazines
swining
soy
sox
shoots
lias
downest
fabric
anana
waits
farhest
support
onject
personpiece
jans
raped
width
grasping
stsaning
holdingthe
music
avocados
aerodrome
shinging
overhang
happy
sauteed
30s
straggly
diggity
offer
forming
tigers
oil
ahnd
finnair
ratti
stand
onlooker
paneled
suspect
paraell
grrom
wuit
array
inside
jwalking
bouncy
devices
paprika
aplliance
azz
lays
skychefs
babby
smashed
shirtmt
panels
toching
feet
brimley
151
passenger
juvenile
152
ornaments
teaint
holdong
garaffe
tournament
jcket
textbook
crumble
''
appleyes
collender
crumbly
mozerella
bedsheet
airliner
splotch
sprouts
tooth
ericsson
evaair
triangles
femaler
knaki
floow
leer
mouschate
dotted
floor
sheesh
lmiddle
parkinhg
kreuger
ontop
horsse
flood
nestling
warms
republic
badminton
hijabe
sunset
hijabi
smell
roll
flook
goupy
greenery
barnyard
palms
refrigeration
messing
geezer
mariner
taurus
tsrit
soop
speach
keybaord
televsion
sqiggle
contanier
smelling
rolling
cleaver
shamyana
fourwheelers
nxt
cjq23
fastened
pez
98
spects
latee
italy
sniffed
pioe
unenameled
bball
quicksilver
broccili
backbag
whete
time
push
444006
overturned
previously
horze
doberman
gown
childs
:(
:)
chain
whoever
skeep
victoris
activated
scuffed
motorcrycle
burritos
skate
childe
90
trashcan
convoy
chair
flinging
chait
93
competition
entwined
tilt
ballet
uneven
ver
ves
blurriness
crates
crater
veg
biggiest
bicycler
97
sneakers
poors
phoen
veh
bearst
dragonfly
fatigues
icing
lrg
skateboad
colliding
choice
:|
blurriest
orner
redish
knapsack
pee
addias
fullest
fifty
exact
lari
minute
p7
cooks
healmet
mahn
rightr
1706
signal
tear
kneading
urns
flore
ollie
btween
minnie
skewed
loady
:]
picup
alicante
............
subway
teal
team
inscribed
skewer
skateboars
stirfried
pompadour
bergundy
batsmen
toothbruch
inserting
bulldozer
shirte
grantin
helmit
rightier
eyeglass
minion
fingernail
shirtm
kilbourn
shirth
sign
shirtt
tankers
chopping
shirts
shirtp
frankfurter
soccor
shirty
bagging
headset
reddest
bottomish
manred
trow
taxing
papa
melt
blushirt
current
cockerspaniel
bungalow
powedered
casse
aples
falling
ground
badge
fuzze
faceguard
banister
paneer
climbs
obscures
shelve
plucking
effing
shortened
gulc
smiths
address
alone
along
afg
unside
passengers
crumbles
dusty
cronut
tiffin
soilder
rocotta
cothes
batte
kier
preoccupied
wavin
blusin
reg
crimped
love
sancwhich
gearhand
radish
vitals
prefer
bloody
oerson
absoluty
texture
tailand
ltraffic
blck
forefront
whiet
frnot
umpi
posed
eastpack
crammed
queencake
nitro
working
desviacion
talikg
wicker
angry
pastrie
tightly
wicket
nearset
moniter
opposed
wondering
calgary
shouldered
rightfront
burgendy
wicked
scratched
botplate
tined
marbles
braiding
e9fgb
peopl
claus
cardenza
tailing
plstic
visual
goods
tines
afc
marblea
fromright
skirting
spaghett
riders
mascot
zibra
sodmething
linens
purle
heineken
lumberjack
backgroud
runnuing
seenery
cowhead
printing
billing
three
remaning
following
caution
zippers
vegi
sheeting
hided
osage
jq
degenerate
mirrors
frogs
awesome
hiden
hatches
parachute
locks
crem
bbatter
graduation
hides
kream
234
barbershop
mirrorn
necklance
stole
awoman
listens
elephang
winter
llegs
elephand
buttered
divided
poloar
poking
scooty
nonblack
ssu
cirlces
horseerson
streached
elephant
ramkin
haveing
elephany
orginal
reeeeeach
obsucred
edinburgh
snaps
chillies
laundry
fingernails
coming
datz
annoyed
spot
hod
latte
breasted
vested
mcmuffin
dsheep
date
such
rman
headscarf
lids
reined
parkimeter
surfing
natural
aeropostle
rustic
ss
wheelchair
sp
rangetop
placemat
su
st
quadrant
darkened
mango
truck
sm
truch
sc
mange
pulled
quadrany
se
sd
drunken
roreigner
feedin
webpage
opposte
drunked
truffaut
flips
096
years
decals
course
persthe
dapper
inback
counterclockwise
dye
datestamp
wohlding
0ne
hedge
jif
peporonni
ovals
yawning
thumb
accordion
milked
cleanest
bagels
jim
sketings
maching
bocokki
attraction
embrella
gatorade
onebending
931
style
spectales
apron
ladty
owmen
civilian
matches
cupcape
aaple
blackish
recket
facuin
records
cheetah
skewered
obowl
twilight
\
suicase
chappie
ketboard
&
motorbiker
corener
relaxed
didn
misshapened
fisherman
jellyfish
bowling
handds
quarter
griraffe
quartet
turtle
skiiboarding
square
retrieve
jetstar
mexico
songbird
fluted
crushing
bovine
fallin
girlffe
sponsor
entering
beetle
ridht
salads
flutes
troll
joker
canvas
skeing
container
6oclock
twirling
cobs
blu
blt
nudged
squared
lazagna
downhill
mahout
bll
seriously
exploding
troly
blk
internet
ble
clowns
squarer
squares
bullwhip
mcgriddle
facedown
mamabear
hairdresser
sheffield
thep
seventh
quite
bumps
smalle
senter
besides
grandma
bumpy
umbtrella
chineese
woaman
smalll
lchild
shores
training
struttin
chases
silhouetted
disguised
dinosaurs
backside
readjusting
brownskirt
punk
rummages
ostrich
chevy
smaling
massive
skiing
router
draggin
undercounter
jumbled
microphones
oni
onn
iveco
onl
newspaper
petulant
potter
hashbrown
botlle
one
posiiton
raching
fenceblack
ony
almar
spokes
oped
spanish
onr
chubby
potted
custom
open
onw
ont
opem
urin
city
fy
boulevard
eaating
streetlamps
occupy
bitg
bite
waist
bisquit
peperroni
t
longbed
farthermost
mams
2
draft
stuffed
typing
streetlight
eyebrow
clossest
royce
bits
williams
pamily
bebeh
cventer
homemade
romot
floppy
shawl
flatscreen
squiggled
padding
ridiculous
blacksheep
slashed
loving
squiggles
pabuccis
photographic
ingrey
boyfriend
underweight
coata
iceberg
toilit
bulldozers
breadstick
turntable
coats
siding
future
glossy
greyshirt
college
tophat
coaty
zzebra
russia
helpmet
rothfuss
mountain
addressing
chocovine
san
sam
generation
closlely
turned
paltter
alley
sad
woah
say
sax
woam
buried
woan
sas
turner
turnes
saw
sat
smbackground
inches
grizzle
wink
olesum
employers
depicted
downwards
somethings
duplicat
zoo
note
venue
lesft
take
roadside
sandhiwh
destroy
blinding
noth
tennesee
butterfly
handing
printer
mostest
halting
opposite
microwaves
buffet
dispay
printed
backwith
knee
tleft
inserted
ornange
damage
armrest
sneekers
lawn
peice
sall
sde
blackcar
average
bicyclist
sald
drive
brownshirt
cushioned
moose
crooked
messier
wind
batil
atlantic
badl
salt
ib
touchn
backmost
walkind
walking
beaurete
cherry
beha
walkinm
zeba
weiters
elaphant
grilling
presenter
peaches
hittting
bright
lettered
floweretts
eprson
stoner
aggressive
yolk
pacific
playerwearing
slot
spoons
slow
farting
gourd
rsheep
cloak
sdi
fb
meetter
lr53
going
hockey
badger
uppermost
complexion
robe
awat
lfeft
neath
sidways
microplane
lifeguard
ofsandwich
suitcases
windshiels
ttruck
tilting
balconies
flowerpot
wheelie
herbal
jiffy
outlet
bracelts
cig
redsmall
surfce
clearest
prime
vare
faceing
smokestack
pimp
settings
grille
whers
camaera
godzilla
worried
fenders
tiki
skyline
priest
roger
zebs
snowsuit
borrom
worries
croydon
tortilla
where
xmas
vision
chld
morose
sweatshort
et22
espn
marleni
keyboard
gouy
jacjet
908989
gangster
aprain
horned
onphone
impressions
jiraf
duded
diver
bodiless
nis
mutton
receipt
crytal
3472
wielding
sideburns
jumped
byek
blcak
sites
wrought
teacup
un
bureau
fearless
rickshaw
teens
x26
surfboards
671
jumper
screed
gives
cantaloupe
checkered
jobs
sunglasse
vertical
lemonaid
marvin
screen
mouthwatering
wynyard
wholeinner
blueshirt
lefthand
concentrate
reigns
chces
hornes
jets
backpace
blule
zebrea
caar
spiderweb
jett
concentrated
mans
mant
majestically
spelnda
wioman
faggit
many
fiu
cornflake
vlevet
flipped
s
giggleswick
mand
mane
manf
plantains
knief
mani
grooming
furnitures
expression
backpack
mann
transnorthern
yearly
boal
closese
9000
boag
boad
,
nanner
twin
boay
anti
snawich
boar
geese
oon
twig
straightning
boat
infalted
caring
better
napikin
bably
illustrated
sandwic
teddy
stretch
toothpaste
teddt
soungen
narrowest
theat
breath
motored
underlayer
tieguy
yelllow
reflective
bolar
crawford
fig
wants
brocoli
lanes
brocolo
armless
juts
nunchaku
greenent
cupboards
photol
understicker
centerpiece
turtleneck
indents
vue
audi
oclcocl
decoratedcake
curlys
ethier
wanders
runnin
rtight
tatoos
swtripped
runnig
brpown
polls
brewry
executes
resturant
admired
straighter
fucilage
canoes
programme
steiped
collarless
squeezed
situation
oranage
passes
girth
twisty
77077
speghetti
pinkj
manequin
shepard
canoe
tourists
brow
purse
pinkd
bros
pinkf
pinky
blah
blak
frigerator
canboe
brok
bkue
brod
blac
engages
technology
blad
broc
323
coconute
jacktet
pigtailed
vuittion
rooting
smoother
wiring
6410
shirtis
armoutstretched
telephant
zipra
pushup
nmachine
cathcder
progressive
colest
ludwig
dqrk
visually
barbed
wires
edged
aphron
abandoned
unweaving
shapped
cheers
foresty
edger
whity
barber
colser
advertisement
6739
cushiony
dominion
booster
proud
mohawk
traing
colorblind
roulade
tthe
trainm
vacant
4oclcok
customized
nothin
padolfini
ilight
ppl
trains
genie
grumpy
motorcyckle
eyellow
summer
214
tietruck
212
210
being
ress
beind
knot
218
saile
slimy
steamer
oldng
sprayer
babydoll
realaxing
defend
township
weekly
atree
blonder
cilantro
irizar
tailgirl
baimhi
grounded
litte
umpier
attache
adonut
littl
plumed
instrument
buclkes
parson
armchair
stopwatch
froont
tucks
cucle
mawith
hugest
skies
skier
(:
grapefuit
crusty
around
middlish
darr
marshmellow
giraffte
crusts
period
dark
scraps
lapop
traffic
darn
leans
darl
baskest
world
cinzano
postal
vague
dare
smallpiece
broccolli
tarp
apple
rhubarb
61
claf
clad
pol
shiefl
fossile
pom
clay
claw
poweder
stationary
kennel
clap
grouping
catamina
seating
66
noting
explaining
oriented
dilbert
drss
pickled
tvs
playig
68
yellowgreen
elements
lobster
poisonwood
kola
diving
pickles
raccon
thinks
battling
collor
touchging
wristband
tote
strewn
broccolle
tube
bartop
tuba
stroking
tots
partials
redlight
exit
runaway
leftcoach
partialy
dimples
suchi
tubs
mead
fatigures
scientific
power
tailmiddle
firetruck
sittingonback
laidback
strret
underumbrellla
725
throwback
teammate
;)
luxurious
seond
went
slatted
sest
stone
acf
ace
fronnt
ack
pelicans
ffed
favorite
slender
meal
zerba
hleft
act
ffet
slighty
cantelope
berger
astra
curling
marshmallow
anothers
headsets
image
ferries
ridng
legged
hcoucc
prepares
cowhide
fritters
mopef
moped
parties
womanin
agaist
propelled
purplish
racquet
tropical
carf
ahndle
her
racques
bristles
violate
transexual
hey
lounging
clsest
0clock
hea
sealed
series
hen
bubble
bristled
hookers
botto
bottl
whie
destello
complete
botte
hairdress
lwoer
spider
wite
bundt
botty
gurney
mice
blueish
with
botts
buying
horitzontal
pull
rush
october
helmate
rescuing
monopoly
tallesr
tripe
itatia
planters
rags
snowshoes
piosition
blankets
dirty
ragu
darket
crowds
torso
agree
rust
darker
swaggy
gone
ac
ab
ae
ad
ag
af
ai
ah
accents
stealing
am
al
watches
uin
ap
tshirt
ar
au
uit
sholder
walks
swagga
watched
pedestal
admiring
frys
walky
cream
quseadilla
collie
managing
beaming
cooked
shhirt
swooshy
graduate
tight
vin
someones
friggin
puppy
curlicue
elvis
presenting
phtot
fsce
shirtb
4m52
clipboard
videocamera
vilie
trombonist
peakaboo
slant
dented
terra
waving
herbs
gravel
midget
keenly
midsize
terry
denter
a8
micosoft
mattpsyd
boutquet
tiger
furtthest
2009
padlock
masn
tricks
groom
mask
ramakin
dyed
having
trickk
mast
mass
nelson
cpp
recycling
leftboy
cpu
bluejacket
plced
gingham
choy
motocross
sce
birdcage
ceramic
neigh
geuss
rasied
ry
skirted
windsheild
tours
baldhead
zanalla
foggy
mna
2306
subjects
tennisplayer
taxicab
cococut
lightup
smily
tx
ty
tv
tamil
tu
tr
ts
tp
skit
tn
to
tail
chewing
th
ti
tf
smile
sidewayrs
te
tb
tc
pilows
ta
roadway
case
appointment
ofthe
linked
whitye
reader
freebee
elephannt
prehistoric
tatted
batow
aniinal
pirce
easyjet
kiwis
condition
donbe
`
hooking
wineglasses
cable
zbra
sauron
skaateboard
tam
flpwers
joined
motorcycl4e
layind
large
dinosaur
sand
adjust
harry
small
mammal
dodges
dodger
khacki
angelos
foundation
chocking
freakin
190
193
powdered
past
stamping
carriages
displays
flamengo
cameraperson
olny
bicyle
situated
brused
glss
clocl
handicapped
orangers
cloch
richard
clock
ritht
vehickle
section
bambo
umrebrella
fucks
burgundy
purpleish
bicylce
tailights
nurse
cn
piture
fucka
revealing
hasn
full
hash
smilign
valparaiso
poses
leaping
hours
furthermost
tuching
dfh
scheming
palin
hast
corwd
yellowed
palid
pizzzzzzzzza
partiall
dill
childon
hove
decks
shriveled
fontbook
razr
hoodia
norwich
pics
prior
onfar
pich
hamster
perso
pick
action
pice
countin
concerned
restraunt
chaitr
turnned
via
followed
grapes
adidas
vie
womann
grubbing
vio
chaur
pulle
vis
follower
pully
fowning
manage
pulls
gosh
activa
select
854
firts
silva
obstructing
sitted
ridding
songs
stander
alcoholic
frontmost
pears
odometer
pearl
sitter
trquiem
tometo
pitching
6
greasy
persdon
more
teen
door
teeh
ulriksbanen
alcove
signpost
company
batsman
redhair
telephone
mircro
tested
inder
shaggy
airborner
oceanfront
atb
teet
wound
spiot
bater
lotsa
bedford
keeping
bannanseal
jaciet
science
manbag
attention
thickest
swimwear
mall
skiies
gesticulating
kakhi
knocked
seagull
male
17
scramble
eyballing
flowersc
beautiful
playre
scam
gallop
messages
bidet
neglected
grop
accept
fiving
states
biden
salty
elbowed
ortange
gallon
scar
dress
tapestry
garden
huge
brownn
hrse
soarta
stickers
speedboat
movile
objecst
amazon
hearty
glowing
overstuffed
worry
bbird
hugs
browns
matres
brcooli
alady
creature
medley
rungs
plant
ficcus
plans
waitstaff
notre
origami
togue
plany
plane
sprinkls
waver
isb
wwhite
snap
authentic
plank
responded
mous
stockpot
deviled
resemble
leroy
boarders
register
rowdy
hauling
volleyball
scruffly
wrench
media
trellis
patio
pans
wooly
adorned
durrant
mexican
ith
pant
bowl
olclock
toa
blowdried
mousse
capitva
pright
nuzziling
pivcture
paper
scott
499
brim
signs
phamplet
broadway
smiling
its
roots
panl
saucy
laced
licks
squakk
bendin
stsanding
houseplant
califlour
formost
firagge
pigion
omn
midde
partcial
laces
hydrent
isaac
travelling
arrange
sauce
hoop
ally
lacey
colleague
hairdryer
toiletry
orgean
sucker
gadget
paraplegic
frisbe
harrod
picuture
frisby
frizzy
vilot
choba
weeds
hotdogt
shortbreat
canada
utensin
sweter
hotdogs
stewed
iced
teeneger
whitetest
lettuce
nugget
always
mandarins
yellows
stnading
swimsuit
sanwhich
piping
knight
yeloow
shocking
mandarine
disorganized
coring
lantern
sprinles
blueh
brunette
england
bends
topside
partleft
coulumn
178
stationwagon
blued
llight
palyer
blackwith
investigated
rackegt
ladels
monotor
righth
froreground
bluer
cantalope
blackcolour
bluew
really
silky
potbelly
tentively
toppless
screenshot
blacks
silks
blacky
luttuce
smaller4
magazone
conut
onsecond
pictuyre
denoted
hv03
hangers
nest
blackk
nervously
brucoli
risen
scisssor
calzone
porcelain
rised
trani
splatter
cockpit
outfitted
fatass
taining
disggusting
rises
veritcal
bottomest
director
owners
shipment
persons
condements
similarly
hulling
sicker
rearend
rack
passaneger
jelly
w
bumper
unmanned
orage
castle
rj14
clump
craisins
major
vitoria
gazed
persont
forwards
emblazoned
colundar
historian
corningware
chco
gazel
number
78
feeder
yernal
hehind
changing
ironing
glitter
ceossed
sstalk
staying
guess
heads
jew
jet
scrarf
benedict
cradles
threatening
backish
dfm
equx
fulled
headd
flippers
eith
saint
tallestsissors
hoto
wshit
squre
jen
huggin
tats
summit
giiiiirl
hangng
warmly
vanished
tomatos
omelette
interviewed
immediate
tomatoe
taught
mural
veiwer
necklace
theater
baconish
stairs
gilbert
obama
legs
frock
head2
potatoes
fuzziness
kreme
drift
toothbrushs
drress
slaw
tummy
determined
marriage
fryit
fishermen
toucjing
taxis
aay
turqouise
vae
ueddi
berad
singla
basically
mooves
refrigerators
shick
mossy
waterbottles
swanky
choaker
hj
pedestrian
graffiti
blong
blond
luzon
sidewaysish
bhs
burried
nor
sell
ballerina
sjoes
stemless
tough
peerson
carnival
spaghetti
self
mian
alsp
silvery
orangefrom
also
toothbursh
strawberrys
knobs
dairy
brace
shops
relief
play
zegra
puree
broccloi
blackboard
darth
pepco
laptip
plat
unused
raucous
coffiee
dirtbike
plan
7106
tips
accepting
faint
mpizza
plag
greenshirt
cloumn
plad
brownish
barret
captian
omaha
tpo
sometimes
cover
dign
eatingi
applesbatt
bullseye
anthem
macho
halp
barrel
scuffs
attacking
vasesmaller
wording
smudges
middleblur
stuffie
ugo
somewhat
gold
samsusamsung
stuffin
blended
tallests
fluffed
ugg
lengthwise
hatband
nubs
ugy
session
inbtwen
freight
bookstand
defender
hugby
cowperson
closeest
overwhelmed
blender
dakrest
wraps
cabover
sayin
motocycley
e002
drinkable
allwhite
himeself
gooey
milennium
stevens
failed
puple
poodles
removable
greblack
twins
insurance
jaccket
withyellow
columns
giants
boarding
bodywork
pavarotti
fastball
distance
beams
buttoning
ornages
shouler
lenovo
preparing
closely
devising
bustin
banner
motorocly
devoured
crv
sleeve
grome
rz77
tabby
seperated
snadwhich
lolly
trainnearest
smle
surrendering
caramel
exercise
smll
coors
obscure
tanker
approaching
manger
319
set
sep
showen
jade
taple
uikes
315
tred
multicolors
slanting
see
professional
sec
browen
sea
sips
intending
sen
outward
motocicle
eman
knees
#
clise
matter
movie
currently
elderberry
topmost
pickup
103
ps4
rith
rite
halfway
nope
monsters
rita
dominat
europe
blow
switchplate
restaurent
balk
cabrera
giriaffe
ligts
begind
buoyz
brocollet
untouched
ligth
torward
walding
coffee
jointly
flatware
boutennaire
fame
pereson
chenille
baring
cousioned
lasr
feeling
last
lasy
gifafe
hint
beginner
bightest
aeoplane
paiting
connection
les
lase
boutoniere
retarded
spreckles
whole
airplace
lanyard
patty
hiar
offront
loaf
):
ocuch
sequenced
drunk
sammi
forklift
smashing
thoooo
rofl
olly
scallop
bely
dozer
thescreen
frosty
scottish
bzebra
sammy
bluejeans
belt
souffle
btaking
devil
frinds
lr90
conveyor
jockeyt
seep
crispy
verse
cheeked
hitting
options
nectarines
orane
shyly
lett
longuest
sleeved
squirrel
vinegar
fire
farside
wheeler
mehmet
fund
racer
38
racet
girlleaning
wheeleo
\/
firt
pollows
444
wheeled
firs
tomota
cote
handling
coveralls
lmoat
hostess
caged
straight
brunete
seee
openest
sesame
nanas
leanind
pressed
eumbrells
leaning
kissing
sleaved
robin
cages
secluded
pound
ducky
arching
backing
calculator
owen
binding
ducks
wpman
triple
aove
aeroplanes
2up
proctnr
motorc
motorb
chase
funny
decor
paddled
since
choking
maids
amn
mailing
elevated
youngone
shorter
shortes
sandwish
virtually
pecking
poopapotty
tarnished
05
stickersu
uswith
waiste
bycicle
snail
plantain
flooded
glitched
pikachu
cigar
cityam
sucitcase
ziti
alert
tassle
haand
behidn
levels
cucumber
cauliflour
unripen
stack
stach
euro
manufacturing
canned
til
doughnt
elef
cmall
desembodied
knb
picks
elep
concrete
persom
services
kelly
kabuki
62nd
brocoile
persob
clasped
shirrt
soaked
fast
landscapped
sightly
siited
styled
residue
scessors
dresssmiling
oncomming
boel
motorbicycle
oposite
stunt
doily
bukk
simi
3042
helmeted
oranish
unto
prop
sidwwalk
drizzled
sandal
defenders
goblet
cuffs
lady
eleft
swinger
chest
fryer
pillars
eager
biggun
horseradish
parents
drizzles
crying
whitebike
input
sheared
maintenance
surprised
chess
jutting
australia
airplances
conatainer
emergency
outstretcher
couple
hokey
ttrying
sheepshead2
foodstuff
shitty
midle
quest
hitters
baskets
dripping
falcon
skateboardc
boar12
toman
farhtest
formal
sienna
panties
imposed
stylist
ndswith
bruit
spine
sims
parially
vlosest
spiny
davidson
mcgray
boxy
shoeless
3im
limo
leftmmost
carryon
clipping
flowerett
tiedie
utencils
bracelet
furiture
sighn
matson
greeting
8343
b6
palm
b1
sight
greener
underbelly
curious
sprint
pale
zucchinis
halo
clockwise
foamiest
furrier
gruel
jurgin
mummy
scrubs
measurements
novelty
shouldering
holdre
excersize
cupped
girfaffe
seatings
loves
ornate
compute
imbrealls
pweaon
ptop
cmputer
bd
be
carot
bg
ba
bb
requiem
bl
oout
brocvoli
bo
bh
bi
bj
bk
bt
bu
otherside
bw
nowhere
santa
bs
obscured
shemp
by
rearest
ttan
wildlife
hortse
gifts
parcial
anything
greying
whiteboard
packpack
ephelant
wrinkles
rusting
frisbie
wrinkled
midlle
forearms
kbeanie
whipping
bonding
1rst
repair
scating
clinton
colorado
garbage
piering
tendrils
into
batminton
plainest
firls
dame
wlal
middleton
curiosly
primarily
comcast
controllers
standinh
physical
sightseeing
themiddle
span
harnessed
tasting
uncer
exposed
sock
spag
submit
u2
spaz
suir
straddled
milne
zebrah
suit
certification
:
shite
athlete
spat
trrak
blueprint
jackt
7181
atlantis
hawaiian
linx
jewish
poster
atop
pastor
jacke
link
unblind
wearng
ling
jacko
line
excpet
pain
postitioned
talll
geting
uy
motocrycle
uu
ut
billshrink
up
us
ur
um
ul
uo
chesse
ciw
uh
uk
faded
ue
ud
ug
marseille
ua
open0
faar
insignia
amaial
camp
discolored
labrador
yarmulke
defined
oclcock
chai
chan
pepperonis
yyes
comming
char
fisbee
chap
arabian
chau
bedroom
doe
skateboarser
propellier
yelow
phantom
smidge
firdge
tuskers
gooing
fixing
girrafe
girraff
preventing
points
dm
tuff
swirl
torquose
sails
tart
9h55
trouser
scrub
freez
sided
snadwiches
dweeb
pinkshirt
lufthansa
scicos
fronbt
seperately
guldens
airconditionered
dew
sides
ago
furthest
lane
land
fighter
wafer
beckmann
overtop
pedestrians
tghe
crinkly
holes
relfection
walked
crease
furthese
brocci
texter
beverage
croosing
came
crinkle
walker
fresh
holed
hello
lany
labelled
melty
code
partial
serviceman
squats
moom
splashing
totem
cobalt
totes
sammitch
wearign
sttipe
1990s
toothbush
gcarrotsgirl
retail
becon
chillin
teenis
scooper
saree
seni
fgraduate
windowsill
turkish
quaint
younf
young
send
utensiils
n8837b
toohbrush
cesar
outwards
blackman
trofg
504
indicating
stocked
droppings
umbrela
abercrombie
umbrell
chysler
panting
whhite
jist
colapsed
suitcasre
llama
mixing
l4618873
decorating
j322bsh
forks
center0
chocovin
tri
trk
magic
bahman
tro
tra
eva
gettin
tre
attempts
fewer
try
chompin
emergancy
race
ockock
monieter
botted
weilding
logistics
snowskis
595
pleyer
vehice
airplate
braying
diced
sweaatshirt
zebraputting
crook
a1109
video
enclosed
trackball
assembly
odd
ode
ues
index
boutonniere
sweats
apparatus
balla
disquised
thirds
delicous
multimedia
agianst
sweaty
silverish
uhmm
indian
chickpeas
sandwichmeat
nanners
flowing
bire
bird
waling
birf
scenery
led
lee
lef
leg
lei
barette
crosslegged
blode
punch
leo
deserrts
691
let
slaughter
licence
ubuntu
sulver
napping
fifteen
airasia
numbewr
baesball
impressionism
great
casing
sandwach
blueberrys
ctr
receive
involved
inoperable
titanic
frontboat
celbrating
liwuid
headline
eatin
saturn
tennisball
parkign
grandchild
buss
popcorn
{
phon
makes
maker
escalade
attends
rigged
woden
firefox
scania
335
334
skeeing
336
slid
peakingout
mariners
sgirt
pillion
whitehaired
bycycle
bust
sirt
droid
bauturm
yellwo
pedicure
tools
strainer
rlower
standing
chocolatey
standind
strumming
minvan
zip
maneating
greenfootlocker
chocolates
kirkkady
theme
next
bikeelephant
zig
capri
catttt
quesadillas
cougrs
cheff
carigan
marm
rick
pencil
slim
babe
rich
besdie
pastreys
tihnk
corrots
hooker
uitting
seseame
freezing
deserve
carrying
bullhorn
babt
sharply
unridden
baby
placard
shoelaces
laptotop
casserole
buttefly
customer
bena
craydon
balls
animals
phot
visisble
this
challenge
pepporoni
emerge
wioth
pour
og
wedgw
phoe
thin
housplants
beavers
cagiva
turnedd
phoo
streamer
wedge
rodk
wilford
bent
reeds
loce
process
lock
ak
benz
rode
purposes
saled
pieces
high
directlly
slit
neart
tallish
bend
slip
boner
blvd
playstaionmove
kness
paws
trumpet
rods
microven
rightyest
hookie
clogs
docking
teenth
brands
wueel
destroying
purpose
tableau
tourquoise
urnial
tightrope
escalating
pair
animal
wolf
boodles
native
establishment
puckered
paler
contraption
yellowish
marron
blocks
river
halter
aspiring
dudue
impatiently
wallpaper
wristwatch
tieg
tied
halted
hitched
notebook
demonstrating
scr4een
tier
ties
cabbage
hawk
racks
autograph
uout
tomato
htdg
monkeying
winebottle
fying
counter
scatingh
prawns
element
knotted
horsted
tounge
alloy
sdie
strabbed
tiled
motorcyclr
sitck
thigh
bitty
directl
move
constable
spatula
label
passion
coastal
motorcycle
a15
trainstopped
lunchbox
tonges
aple
perfect
nummber
poseing
swishes
mistletoe
decar
airoplan
aleto
pullover
youg
decal
hobbs
degrees
lieing
cuitcases
baseline
2011
2010
2013
blacksuit
carots
prosper
snaks
seatbelt
vonnegut
intials
organge
docs
outlined
ship
newman
dock
taos
stiker
snake
kiss
ducked
howing
penquin
cage
shrite
presidential
lazycat
coriander
wrangler
catyou
wnite
buckrt
glassed
scenic
elge
concave
glassea
accompanies
clasping
sniffing
textbooks
sniffs
zebta
follow
truth
persin
togethor
accompanied
beneath
presention
pct
francisco
glasses
mets
disck
closte
cowpboys
banas
doing
greeny
bookj
theback
zc
grilltop
sportsman
standingi
bouies
fith
banaa
thirteen
bookw
jagged
tien
aroon
banan
goalkeeper
lpl
orabes
tou
bunched
matrix
'
suitecase
rigging
whiate
singular
poclets
6onl
bunches
hilarious
sloping
burka
sandwch
highs
frowny
klm
uppr
shut
await
girriff
shitrt
blackhat
thegirl
tempo
welches
greedy
inhaling
farthero
loool
berson
milkshakr
fishnets
fetal
audio
sindwich
steering
shortest
godfrey
scissore
scary
backless
veggs
mesmerized
aquafina
latches
could
messaging
obstacle
bak
ccut
length
pigs
pudding
meatlof
biage
davis
receding
scard
gallong
scarf
cuttung
snadwitch
respond
eliphant
shirton
manuscript
blown
yellw
piner
453
scene
owned
jesus
rightiest
fits
bttom
ihn
atitalia
rightne
ihm
owner
orangered
ying
rackt
eartag
pined
tyook
surgboard
plateform
ordering
terrier
licens
detailing
system
misses
inhat
clisest
goalee
cats
secoond
brockley
decorations
phonecase
coushions
chese
low
back
enforcement
gummy
caravans
stomach
stars
prostitute
shorts
difficult
unoccupied
shorty
botom
bettlguese
wwoman
vouch
bombers
yellosw
firehydrant
wate4rmark
boeing
barbies
etic
bankinni
steel
sporting
buttocks
unamused
elepahnt
trike
busted
sittuing
stewie
thers
afican
appealing
decided
rollercoaster
shheeep
drunkerd
steer
skully
locamotive
vicente
viewer
ceneter
scarfcoffe
gently
spelled
robot
tonight
fail
carraige
defending
ponders
loveseats
practicing
clearly
viewed
vace
documents
livingroom
dishes
studying
umbral
skinnnier
onse
mosaic
companions
bonanza
latina
babes
nylon
linda
korean
southmost
scooping
soap
;-)
boutineer
rikshaw
jimmies
dinker
nancy
freestanding
visu
lefgt
byscle
lefgs
opentable
petals
yleft
device
westernmost
unsexy
zeebra
medal
stiches
faci
placement
bowlof
liked
bred
bottlespray
ploom
casserol
face
apolstered
oldman
labtop
mustache
airfield
mechanical
facr
ftont
painting
scrap
fact
rightphone
brekfast
09
hoodies
omelet
ricey
femeal
rings
sunvisor
woolly
abovest
centralized
grsy
woth
bikes
rainbown
lloyd
yolks
paerl
rough
brink
8852
footbal
pause
noir
planter
jay
hops
jaw
jat
jar
yallow
should
buttons
theclosest
planted
tape
rinocerose
theywillshutusoff
maggots
riding
perdon
carrotethe
hope
oppsitie
matress
destiny
standig
handle
sweetie
means
onlhy
gobbling
lucky
aturn
bonde
fronds
standingle
brocilli
telephoning
blackcurrants
exchanges
pandolfini
reusable
styrofoam
abby
amid
donught
embedded
lighthearted
h
fusha
rapper
pirota
stuff
congratulates
dallas
nohelmet
centerish
ohio
rein
aem
biblia
palcmat
guessing
btw
hirl
flicked
bucket
frame
horns
packet
edition
slanted
framy
skateboarding
btm
9305
sauser
packed
nlooking
coils
wieters
wire
pohen
amtrak
mien
underarmour
bsby
wirh
rolled
miguel
vulcher
pistol
email
wiry
ends
faceless
tugged
chaild
hitch
kurtha
grafiti
scolds
butts
hogging
grasp
mdidle
gnomes
seaboard
europa
raquett
ducj
banada
tented
staring
pillpw
380
extendable
figured
drum
smalller
tires
ramp
sweathsirt
drug
rams
etc
sugared
figures
halfed
trapezoids
cocato
puff
restrant
hoarding
humanoid
wte
bottel
bottem
adjusted
ch
co
medallion
cm
firebus
taylor
stranding
ca
closeset
ce
cd
powertool
pounced
cy
wearning
adjuster
ucb
oregano
prairie
cs
cr
cp
cu
ct
langkawi
ssurfbaord
suitcaes
mailman
avacado
plaided
powered
flourettes
sienfeld
sqiggley
holidays
moncuit
griaffe
uhoh
sploches
rightperson
aquamarine
lr
feather
waste
beaar
skatedboard
>
middleolder
bannas
sunroof
commuter
weeler
treein
drolling
neighbour
champagneor
bannaa
hindquarters
mannequin
graphics
c3
atlanta
ravens
bannan
righttest
ucky
cbr
backrubs
coolar
moocow
elepgant
runway
britain
woodblock
grinning
swhite
rbk
guyle
expecting
hahaha
frappe
sisters
bathtub
fielding
groin
sith
va
stuffing
vc
fullbus
ve
ripe
crissonat
nefore
lush
designs
vn
jammies
lust
conditioning
situeted
incense
vw
forground
uggs
sits
pontoon
trackpad
braceletts
tattoo
skateboarders
overcoate
highlighter
pith
doule
juan
concealing
spends
highlighted
gving
concealed
unc
pomegranites
digging
fower
nonstriped
purtain
backgrund
nummbers
broccolu
ball
columbia
dusk
smaill
montitor
drink
balc
overseeing
coffe
surfboarding
tidye
thks
tathered
peir
robotic
dust
overalls
afghan
broccoli
fielder
pokadots
miror
scisor
off
antenna
patternd
sodaall
shotgun
colour
3ocl
braclet
lapdog
357
patterns
rainbow
command
sliceon
powl
350
typist
drawing
359
lest
hauler
smagung
bananas
less
moments
inshirt
gun
immiately
clocks
guinn
bananaa
bananan
clocky
paul
glue
floet
web
dhirt
residential
chair6
canister
transparent
guybcutoff
lattice
ramikan
cosmetics
clipped
wet
necks
5
as
modelintraining
teriyaki
leftone
thirtees
streaching
crum
ocntainer
checking
piee
seagul
stooped
dudwe
dess
cruz
solider
five
mapfre
margharita
desk
toliets
blindfolded
nvm
sandwichs
pier
pies
desc
chairy
fdown
broccoliat
onion
criss
chairs
chairr
cpml
midground
dept
garage
alongwith
unbuttones
bulgy
brakelight
paneling
yop
trafalgar
poor
elepnahts
courts
untucked
ballon
squirrels
portly
interact
peer
airoplane
whtie
memorial
almonds
nride
choosing
oralnage
thier
motarboard
250
transport
pillows
desseret
wetter
4oclock
60s
jalapeno
literally
avoid
separate
kiddy
backboard
doen
fedex
pegeon
tiverton
blurrt
blcik
saucepan
cavs
counch
truffle
kiddo
vlue
blurry
cushon
miirror
bombardier
blowing
unsidedown
pear
foodtruck
cumber
truvk
watercraft
469
wields
vgetables
gandalf
cordless
fllowers
cops
stage
repaired
sister
poliza
strapshirt
eother
gazing
grayer
headstand
extinguishing
peal
langer
5oc
touchign
furred
seeds
blackness
concession
grayed
omelatte
alumimun
swimming
blury
cadet
branching
letters
suited
screamer
pussy
pigging
flailing
snuggling
touchin
wlking
roads
capcicum
merc
skulls
guu
gararage
advert
yrk
spoty
brownies
poon
housing
pairing
caviar
eeny
spots
prongs
bump
exchanging
much
husk
shortsand
sanded
pottoes
graham
naturally
bagged
31e3
funnel
desing
hlding
indicator
cordes
westhood
536adf
1950
delivery
n8293a
lowered
leing
grate
pnats
8090
apollo
assult
count
equipped
baptist
peanutbutter
tossed
places
chained
betwwen
giriffe
smooth
volvo
sterilizer
sittiong
vegen
books
reprinting
fusiness
monument
itsel
problem
sandwichwith
colslaw
tanner
giraffecurving
bearing
irish
rightly
sambar
baloon
int
inu
suasage
inw
joola
rigfht
bettween
ins
costumes
sibling
inn
ino
ini
skyteam
ink
riverwalk
ine
inf
ing
meth
backfield
mushroon
wholle
compared
mushroom
yd125u
variety
brocollini
marley
gruit
bluestripe
edibles
glimpse
happiest
details
holdng
bearon
partialzebra
ponytail
brulee
frisbee
polizei
tomoatoes
veiw
marlboro
sppooon
layings
stringy
matt
vignette
bedspray
directory
chance
1th
coiled
ziploc
perspn
badass
veil
mashmallows
cheeze
dolphins
ghost
toothrush
platter
eof
batting
arrying
transports
choices
silverton
eon
473
csout
grandparent
ttee
475
at
otline
dreams
aprsley
roberts
kneels
dacker
blured
womans
saver
outlining
yikes
rapid
nursery
lurking
upsie
oldest
saved
chili
adorning
stinks
bikw
porno
bikr
rootbeer
arked
bedcover
stinky
hmrphm
trpophy
arker
swirly
pov
bike
slipping
daze
messenger
slowest
urgundy
worth
litle
alternating
manis
kendrick
godnight
blanket
dragged
guac
vible
68726
closeup
katori
lecture
grumpier
hairbrush
60350
manin
tagging
bya
cmo
croissant
whisk
progression
executing
dolly
fruitcake
stnadin
drivers
roadblock
nigger
casinos
glaced
red
tayor
poppy
oblong
triumph
pointint
thriving
chew
croutching
ambulence
hore
speck
frontwoman
gugy
phones
eleohgabt
aly
impressionistic
horn
chef
headbutting
hors
ifar
colby
oklock
7th
waltrose
panda
applicance
disk
casually
bracelt
topknot
+
tsirt
serrated
lizard
tomates
lemondae
above
straberry
zoomed
skeevy
4olcock
backhoe
consisting
counters
tgoogles
crunch
simultaneously
sinks
doghtnut
wrapping
shortsleeve
dustpan
hyundai
fazbear
bookcase
588
textured
practices
cubical
celebration
darler
hairdo
watchers
daughter
curtsing
items
study
glc
jail
itunes
chainlinked
chilling
smoke
loincloth
calculators
flavour
12123
walkie
duffelbag
ake
cheata
spawn
adukt
kleenexes
tran
shamu
arge
spooky
90clock
angrily
charred
highly
bro
brn
insta
sparkling
comb
romantically
bre
total
bra
sarah
origamis
plow
luggages
sirht
saran
oldm
nine
sweater
coins
bundles
negative
bronze
craving
eyebowl
suitase
shies
ramekin
frigde
onboard
indiana
bundled
blueberry
waring
separated
lable
chilli
prints
starburst
haha
reign
pierced
backwards
shee
bikeblack
gentlemans
zeroed
pierces
beansbatte
cruiser
iv
dolphin
blocking
boting
milwards
boobies
sequined
springer
glaus
word
kindda
err
ers
presentation
elboe
work
eclipse
worm
worn
cuddly
erd
erf
cuddle
era
mechanic
thd
elbow
erm
crackers
camry
sanmdwich
bridal
559
goood
airstrip
nozzle
556
micky
motocycle
hdesk
mingling
yellowjacket
woman
fanciful
veggies
basebal
aaah
9909
bunnet
acrobatic
deboarded
str8
ruminant
recovery
chilly
macys
pizzw
song
nuts
fondant
inmiddle
boatd
march
moron
sk8er
if
beach
offshore
pizza
bottlew
lan
lao
arcs
lad
ladder
mircrowave
laddet
laa
lab
bared
dhl
barea
lay
overdressed
suitcade
dumbo
law
lap
gbook
headdress
las
doughut
greey
scosser
grees
clopse
monkies
motorbikes
greek
stri
sons
green
waitress
parital
ambulance
greeb
fan
scarg
lookikng
tucking
clsoest
zeb
salon
sams
negro
popsicle
office
rudely
drivng
muffin
wankette
zen
bidrs
shamiyana
statoin
munchkin
cusion
natter
japan
slimmer
legally
tennesse
cartot
elefat
wilting
onnea
oncoming
middel
somewhere
highlights
avocado
haphazard
pines
bottled
savory
vents
carton
shear
dount
then
neaest
cofee
hgat
coatcloud
everts
fragment
jerking
thee
safe
theb
truckbehind
slicd
layup
band
bang
giraffe
bana
reaches
they
wender
thew
fear
pike
ther
bannansa
bread
yello
garmet
heeeeeeeeeey
runnign
crock
oxygen
freshly
classified
backgrounds
l
rocks
mattresses
378
dappled
puppet
373
backgroundd
cornbread
377
376
herbaby
lifted
jecket
logs
clokc
dumping
train
couthern
slef
righgt
sled
plyer
booeys
lifter
proping
logo
flock
recognizable
motorized
blows
accidents
obus
sprints
sprikled
fouton
burlap
palat
cameras
hooked
forty
vessels
standding
trafic
moisture
braces
engrave
medicine
batterhh
forth
sliding
vetg
parley
equiptment
colorless
prepare
grazying
frint
mourning
tian
bottiom
tial
carried
vegatables
lemonaide
unifrom
mullet
storm
lollipop
monkey
shrubbery
baseman
ofcat
upperl
created
appendages
umbrellla
raisin
sdress
5910
licked
sprig
buzzard
garaif
uppers
heaver
burnett
bulet
chopped
guiyar
neckextended
staning
backdround
groujp
pots
jkk
poofy
sparse
tostada
decer
shopa
delicious
eoman
haed
comic
electronic
cooktop
154
aire
likely
doubledaker
couner
dogg
doge
mcgee
dogc
approximately
computre
tea
flagpole
john
dogs
kiwi
allow
teardrops
emblem
balck
altuve
happily
ted
fglassas
persson
teenaged
walway
allian
cereal
rippled
wasted
siloutte
guiter
elephatns
lacing
toronto
tex
glassas
target
cutoof
hike
bottomrow
womain
rate
seated
tackler
ababy
ktm
5726
iron
seater
merca
devious
dog5
tipping
minus
dog1
seento
itn
differeent
manned
catcer
ewer
giraffer
giraffes
ambuance
addidas
nothign
dildo
convience
giraffed
giraffee
infinitisimbly
shaggier
infront
jumpimg
standoing
delfated
leigh
longstocking
ter
contents
rearmost
sweatter
smack
ladel
necktie
laden
latter
peenut
hamper
realy
toptest
sofie
bunkbed
luxury
forces
elehpant
bierce
swims
crinkled
snowflake
halmet
circles
luggagae
gravy
cargreen
piller
appl
maiden
ndalas
bruce
boxcar
circley
drifting
mcneff
brownshoemanleg
corder
extending
piegeon
umberla
pantsuit
baricade
shallots
circled
phase
corded
lugagge
oclcck
grave
gunk
keyborad
raied
eront
goatie
crosswise
spectactors
duckling
yuip
garss
missed
csx
cl0ck
deeply
rfom
maxima
calculater
11oclock
fitted
reserve
mitten
woodeen
chekard
m562ruj
opposit
tage
kx53
trailor
ambiguously
anniversary
pastrey
strpped
cruller
oltursa
d4
lense
fisheye
emptyh
toast
plte
sewn
soldier
painfully
peeping
cameraguy
hitter
shrouded
costimue
aninal
hrs
cashews
bnear
pursuing
hawiian
hydor
skys
grapefrut
goalie
rectangle
sur
do
cappuccino
dj
dk
umprella
dg
dd
de
db
dc
cardinals
da
frowning
avacados
skiiing
comode
boxcutter
tsa
dt
beleive
dr
ds
emd
runs
3oclock
covering
scrubber
woma
greray
pineaplle
lookout
cerame
emu
emt
brocillio
gears
rung
pilliw
wannabe
steak
steal
steam
ucan
po
sheering
refrigerador
blant
captures
102047
observer
crafts
lemonade
backwords
toppest
splayed
reastraunt
toiiet
splotches
sporstman
usechrome
cattle
miserable
sketches
midfle
asda
yes
bunting
pastel
speeking
bo9y
drawr
mitch
snoozing
lifejackets
away
tags
gentleman
motorccle
ostly
cellophane
babay
unable
pastey
snowbord
biek
coener
7clock
asparsgus
liht
wg
we
wc
stnding
oragne
plating
wo
militaary
handful
2098
bencch
wi
wh
ww
enters
kitched
unfold
clues
separately
convertible
packages
wz
noon
kitchen
cop
brap
cou
cot
cow
cov
cox
sanals
avent
shouldn
eels
expty
coa
hummus
film
cob
coe
receives
cof
oufit
traly
com
col
con
outift
tone
guiy
sissors
royal
heald
liqour
bookbefore
ruffly
tons
amonth
alitalia
tony
wides
delecious
jays
heals
yelklow
headlights
toile
jebra
engines
flanking
observing
mcnamara
swooshing
giaraff
hawaiianese
hahahaah
eomsn
glack
thrift
scarecrow
caeing
duties
manblue
applesred
90th
innocent
relaxing
attacked
windsail
cruiseship
catering
attacker
righit
online
colock
7844
pesron
offwhite
asmaller
applied
onytail
has
roastbeef
ahead
gnu
oher
motorcycyle
stubs
aiv
teenager
air
aim
ail
whatshisname
orengish
verry
aid
aig
property
higer
vags
mistake
cylinder
twards
posey
plateful
facong
fill
k453
sticker
dumped
audrey
skipping
tissue
brake
cone
burry
curved
cook
elevation
octogon
ethnic
nok
descent
browembrella
miniature
perform
triumphantly
adullt
glsas
plated
platee
captiva
hodded
pieceof
synch
bhenind
plater
plates
outter
bunny
margherite
pinstripes
wheel
independent
viwer
nin
whom
mmiddle
alittle
horseshoes
rail
evil
bening
1552
fidden
piefece
darlk
hans
canning
nip
garraf
gatwick
nit
pliad
skatting
kept
condiments
thx
thw
giraffenext
tht
thr
1971
compartments
tho
hispanic
contact
mamma
holdingblue
galong
the
cupping
musical
tha
opa
pacifer
bbaked
soaf
indigo
partiial
athletic
photo
harnes
2246
girlgrey
palpatine
goggles
farthes
farther
victim
taxied
medical
waffles
clamped
50th
chercked
beaer
adding
boars
blackkeyboard
hills
raseberries
zepra
midldle
photographer
occupants
wright
barnet
belongs
anywere
sited
vanity
plasma
bkack
areato
photographed
viking
shoulder
traulsen
disheson
boxed
dring
mayb
lbench
mayo
dessrt
caps
adkn
lcd
cloting
barge
chaise
cape
dirven
celeberatinr
sweather
zibras
hairless
matrass
rustle
cooler
lily
grizzly
shocks
arange
slouched
pizzaria
stained
firstube
gandhi
pirse
night
bpy
bypassed
security
screeen
nude
tighties
antique
firefly
oggles
shelving
manual
cookware
backrow
piexce
eyeing
born
couture
keg
konig
antiqus
blading
bord
borc
confusing
gight
biplanes
giirl
purple
cusions
manos
maniquin
/
subdued
violinist
eleph
asking
purply
elephands
purplw
beating
adorable
participation
ttoilet
peek
jalepenos
vegtable
peel
trianangle
ysu996
pose
plz
ply
scarved
ple
rightsand
accident
cabby
lsft
post
woamn
dorner
onthe
brissels
trophy
erson
diner
rwhite
theirs
coral
watermellon
musg
anima
visa
dotty
horizon
jacquet
gingerbread
provactively
kyle
octopus
dotts
treble
higlights
sauve
checkershirted
mantle
bananer
bumber
babychair
float
floar
apostrophe
candlesticks
sedan
charcuterie
olc
movements
slce
bitting
balanced
manon
clocok
wan
thebox
wal
fallng
olf
pilsner
gerass
wag
bookend
wad
available
lught
cuchine
fight
mutated
torbay
way
wax
quirky
was
war
tabule
lowest
cke
ligher
snimal
widens
overjoyed
snowy
sheeop
converse
artichoke
perserver
chainmail
outreached
taken
truk
needles
dead
bighorn
shitr
sanwich
sailboats
behiand
true
griffee
amerian
cheeck
branded
yperson
braves
mtv
crop
supercar
plymouth
stripedstriped
mancat
winery
caddle
unusually
mta
mtf
6130
drawaing
gecko
rotisserie
moore
laqdy
ladybug
chimmney
umpire
warring
forwrd
embarrassment
muscular
thanksgiving
mommys
guessed
held
prayer
pineapples
dounuts
tubby
beanine
mousepad
mole
flap
baguette
dimly
dying
nnnumber
acros
vissible
stake
handmade
topped
wihth
carrits
grabbing
mushed
interested
holdind
holding
glas
yellowpot
leetle
jumbing
ceiliany
tenille
tahiti
interactive
downward
juicer
juices
couchwite
welcome
notepad
outreach
headshot
healthiest
brew
seeable
wingfest
duonnut
scores
samiccch
boccolli
mullins
juiced
zebrahead
tugboat
eboy
bede
normally
accompany
stout
yaht
together
yellpw
collared
kangoo
retrieving
goughnut
otherluggage
mmooo
ffarthest
propelor
showsuit
sinting
bikre
aimal
flober
allowed
switched
dance
jones
unbrowned
silverware
horseback
switches
soidler
mules
selection
sandwinch
microwave
eaux
bagunder
indians
sponge
frut
toothpick
deluca
interlaced
layers
bagpack
mounted
grape
somthing
zone
glassees
jogger
graph
hump
flash
whoman
fof
donnet
recline
chickien
ohalf
rightmost
flopping
tush
outfiel
tusk
couscous
mendon
smiroff
spectating
thingie
hellen
southwest
rebecca
barbedwire
browm
protective
blask
browh
hannah
molding
1stt
brownie
mountie
upermost
kitteh
geeky
vegas
browy
kitten
kitchenaid
trouble
brows
colegues
stirrup
margarita
wegman
gnarly
broccali
gue
schoolbus
micrpo
turns
breakdancing
biker
gum
gus
tguy
highschool
stuckin
gut
pinkshirtby
guy
woven
eagles
upper
hte
brave
htc
regret
sewen
foral
bravo
eyeshadow
repetitive
onsie
girffe
thinker
cost
rightunder
portfolio
unattended
246n
avoiding
cargo
kinetic
leftr
barbie
assistance
dunkin
wildebeest
shares
uniform
peels
pursues
1019
illustrations
saluting
goldblum
appeal
dental
cranston
supporting
trampoline
unsure
camisole
waering
muslim
caretaker
cherrios
generic
greenc
fewother
chainlink
1tbsp
goldfish
suckers
fouth
hoops
teacher
change
blackbeard
midddle
buch
incoming
flames
gluton
precursor
eke
touring
backdrop
domaine
pilloe
trial
trian
bangs
behav
llol
kemp
aviacion
glaases
horese
pillow
drees
macintosh
surfborad
barbwire
bawl
defensive
hiking
extra
horizontals
fby
farberware
errings
marked
bullock
uphill
leftl
snowboard
palest
puffed
schhool
marker
pony
fbi
leftn
market
cown
obect
terminal
sndwich
loafers
umbralla
super
pusher
angela
toblack
behavor
live
jam
torontos
crushn
microfiber
uspside
angels
bigg
intently
plugging
entrance
demetruis
jah
countertop
club
bottlebeside
envelope
chuncks
futon
cramped
remonte
oreo
bandna
fingered
clup
outstreached
superbike
spaceships
chochlate
pacquaio
pumkin
graphic
douche
ibm
bearwith
competion
car
umbr
cap
focu
anywhee
cat
decker
labeled
omellete
can
cam
cal
cab
slateboarding
cae
imitation
heart
dedicated
grassy
wider0e
pauses
cinna
tazi
nock
carroll
poiner
sake
grasss
bridesmaid
heard
wordings
chin
yard
pond
chic
outide
clothing
magenta
chid
foregrournd
boutinerre
takinga
swung
sandiwc
fling
spreads
sandstone
usf
freezer
offspring
lounge
flank
actual
observe
gourdon
intertwines
leeaf
motorcross
whistle
whoopie
product
colorwise
craftsman
staircase
extinguisher
coworker
dive
sweeney
southern
farmers
airways
0022970
oxens
ducati
produce
sportbike
vases
pittza
7820
polkadots
vasey
lifting
dreads
peperonis
crumply
visitors
fluttering
eleghant
remember
lafy
brussel
baseballt
laft
headcover
corona
ehhhh
beehive
nosed
pegon
envelop
viewble
arrived
wlpx
assembled
approx
serving
smileing
anothergiraffe
briggs
kuggage
goraffe
colt
haircut
displayed
bended
playful
brain
grll
appron
birdy
radioshack
cold
braid
birds
upheld
cola
tending
westcom
rooftop
sog
curly
untied
willow
holing
curlu
splaying
curls
parcially
lyin
flloral
window
winnipeg
artisan
lx
ipswich
n177xy
tiara
kissy
cathcing
non
noo
tje
noi
disgustingly
shiirt
thrid
nof
rake
oppsite
undergarments
shering
hala
picinic
5199
pellow
tails
easle
half
not
luguage
taillight
sobha
hall
galloping
capris
portapot
streaks
lies
james
drop
aptop
undeies
batches
yellwow
intrigued
wong
pieve
treesh
outreaching
zoombs
entirely
ceat
unloaded
inwhite
em
el
clawfoot
eh
dekstop
ee
ed
stooping
ea
yeah
collum
goose
wrap
fires
ex
coudh
mbu
firey
nightlight
ew
middlehead
eq
monitors
easternmost
er
album
shown
lookint
opened
worman
space
irony
sitters
bottoappple
umeboshi
looking
lookinf
lyingdown
opener
rightplate
makeing
stallone
chaerry
midgit
comptuer
showroom
receiving
portapotty
shows
cloeset
screw
brons
aeg
skaterborder
thong
carr
cars
carp
sketing
cart
diagnostic
quart
barak
heusen
19238
restuarant
carb
headress
lright
rapped
card
care
umpires
cycles
v659
secontion
sillhouette
transition
perpeller
requieum
british
honest
appearing
scarry
tangled
clodeby
straggles
511
510
domed
altitude
malnourished
blind
dounut
shears
striking
sizr
zag
persoon
mountainside
flipping
tanktop
yourself
rino
inspected
directly
steeping
xs
ring
borading
ytellow
size
sheep
sheer
shees
sheet
jugs
nokair
wilth
caught
yin
gripped
tusks
ingreen
checker
freebie
carousel
bodies
iece
friend
sheeo
nutrition
canal
mostly
that
wjite
doughuts
demetrius
workstation
uper
brixton
baldy
pnk
quan
floweres
pece
bbehind
x2
quad
junkyard
flowers
kabob
than
slider
shortedt
motorcucle
television
velveteen
thumbnails
downut
backgound
cooldrinks
karate
daffodils
appler
apples
76
fruits
blaqck
gobble
eguy
occlock
fruity
blasses
browser
crain
crecent
im3rd
fresbie
angel
slay
pokodots
slat
premier
dubee
slap
crossover
13th
highrt
teady
decapitated
drinl
mildew
distorted
isle
breakfast
slab
oleum
pong
lumpy
atennis
engin
pohoto
lumps
veteran
taquero
snout
equipment
baldest
breakdancer
circulator
footlong
ganster
palazzo
berna
2big
anycall
revolving
chopsticks
topping
byotself
price
neatly
numero
leftbaby
blowdrying
shitter
lookinng
plainer
shorn
arugala
america
]
peccing
interacting
greyish
countries
ltalking
breads
tablescape
jurassic
feminine
egg
hurley
crubly
mrs
sialor
wacker
blackliquid
stuf
ferrari
shaves
nutsack
aceto
filing
basemen
ecat
grasps
mainy
washcloth
rightwoman
foaming
direcly
german
ralph
octagonal
scoreboard
hairpin
kstus
discovered
eastbourne
yukky
maruti
teamed
groung
maine
fifth
bblue
butguy
snack
collegue
brocili
stair
title
coar
yrk985
nexto
saints
nexti
onle
annimals
nextt
only
watchign
manman
thompson
stain
fort
zebur
pumpkin
pices
btoom
pastrami
jellybean
urine
samuel
duel
quickly
kacki
picec
cushin
peperoni
sittong
bracelets
bluevase
kike
budget
113
auburn
celebrate
totdler
swim
azn
whihe
womamn
leather
runes
rippling
skaetboarder
privacy
helf
motorbiked
cumdrink
peson
husband
helps
salomon
spork
concert
meters
soot
wiifit
fanned
anchored
linesman
shrubber
asleep
donate
plelft
roaring
sport
visibile
colgate
firestone
swetsuit
tackling
glaze
glazd
materials
glazy
perego
3
turkers
betweem
between
ladie
consiting
ciabatta
whipped
zebr
travels
fidora
notice
redshirt
girlk
tangerines
pine
prettiest
pluch
garda
pcture
buffalow
hurts
article
hydrate
klansman
gamelady
glitchy
strides
fkdapolice
monk
conference
hairbow
pray
scrreen
pubby
assaulting
wheels
lemon
tman
comes
nearby
sagging
fields
pruple
occluded
insweater
jeans
mound
dispatch
quiksilver
learning
butte
forehand
lonesome
jeand
delapidated
pigtails
brats
pedro
olives
scrunchie
cycling
rigiht
bitter
reenacting
paleing
skatboard
porsche
ponyail
turking
cared
onhis
idiot
rotting
spices
shoppa
chocalate
faceleft
mmid
anilmal
proppeing
confectionary
horsehead
fours
aero
livestrong
observers
skiery
9126
pointy
stovetop
external
rubs
stems
obscuring
skiers
ruby
boawl
vespa
cutie
crumb
giraffie
upmost
jens
airtrain
darkhorse
trick
blinkers
rj27
grassland
riverbank
nimber
cherub
middeton
sopha
aboce
canopys
polymer
cigs
writtn
wouldn
soil
inflatable
figurines
brothers
aurora
equal
fllor
shir
evening
embrace
signaling
coverd
heels
beaver
waterway
bareheaded
falke
skatboarder
4ocloc
beareded
hegde
moneky
smilig
chi
prota
squirted
pester
craine
chaior
tranist
gentlemen
wjhite
figurine
alto
icefield
rx100
cen
lite
etf
document
closesr
numerals
finish
closest
squatted
foal
foam
bootays
sapling
vial
fruit
redluggage
cinder
lapt
onlaptop
busket
passing
mentally
squatter
carhart
burrito
whose
sheeep
patchwork
msandwich
smooshed
mlb
burrity
severd
greenbeans
luminous
pitbull
peripherals
joystick
otherwise
amlost
taxi
ck
cheesing
pita
livestock
duster
vent
skiting
rappa
battleship
neon
whiteest
neare
foot
writin
giragge
slugger
ninja
touch
ps3
hoxi
speed
petter
carront
topof
sweatpants
irregular
pockt
death
snowboarder
sheldon
pedal
thinking
choclo
loeer
acton
mirrored
desktop
raisings
7oclock
stache
choclate
mman
uptop
struck
foos
malcolm
momentum
real
propped
hoves
hover
psn
frown
rasta
onscreen
rules
ruler
teething
amb
cortner
amd
stools
blueshorts
ladu
ladt
baybeeeee
thecoach
listening
trsurf
using
psp
recipient
headpiece
rear
psu
corsaige
doghnuts
fortune
pounds
postcard
fajita
streamers
papoose
leek
bigorange
thrower
123
blackberry
veering
dirtier
skirter
huddling
vegtables
twelve
kneesn
crafted
truffles
siloette
changeling
yblue
whispering
eddie
titles
bobbed
guying
birhtday
bacrolli
hairline
middlerow
contaning
leftestbanananana
slaughtering
brocccoli
girfee
advertisment
paint0
sauage
futuristic
uribe
colorfulshirt
slabs
moored
willim
deckered
71
slicked
squirt
acrros
platic
nuggets
uppar
oclosck
weding
youcan
wheat
squirrl
business
sixth
chefs
sofas
strained
usiing
borwn
beansprouts
unifrm
leftover
habe
transported
guides
throw
brighton
surfboar
choc
central
foofoo
poymer
kickflip
paints
standed
kife
bleechers
clcok
chop
frohnt
mugging
babyyyyyyyy
referree
chow
shart
greet
assassin
sailboard
at12
peaces
oldergirl
outlook
nuro
towawrds
cotta
nure
ridgewood
breifcase
leftdog
earring
sivler
zrbra
shock
operator
jetway
emerging
your
bacpack
pirates
stare
grates
grater
cate
toppurse
area
aren
removing
arem
lon
loo
lol
ordinate
start
lop
poured
shelfi
ares
lot
chooclate
loilet
stripey
inage
chalkboard
jacked
leach
palaying
unsnapped
fixture
pitcher
pitches
prunes
lanyards
rump
metalic
harlem
muffintop
narrower
curtain
cottage
pitched
trying
utilizing
toned
hire
fiercly
campbells
irght
joint
ffuit
comics
ceter
doughball
appliance
oranje
freddy
assume
trading
hirt
shorthaird
tones
sugarbowl
gibberish
sghirt
wristbands
behaving
impersonator
eephant
motercycle
oxen
littiest
juggler
vblack
lcar
describe
moved
1200
riht
scratching
homosexual
ehehalt
nathans
sheath
mover
moves
rihg
nerd
knots
seciontion
cough
abvoe
cabinets
infact
yoi
cupake
storage
trafficlight
colli
leap
commando
464
milking
juie
you
steered
houseboat
ahier
polar
poop
diaries
plushies
boogie
ovlock
peas
sideburn
toawrds
podium
flattened
peak
coverage
rideer
asus
pooh
dwn
pelosi
beamer
pool
stakes
building
baloons
condensation
studio
namila
vaces
facjng
cored
qfront
bystander
seatback
showboard
foreest
hoolding
farrher
corer
cores
signalling
strings
attentive
legend
whosw
monte
belazu
skeleton
pointing
peacock
bull
surboard
tweedle
compainies
:/
sporty
mp3
messy
panrts
cuffing
religious
1p7
carpet
 
mating
toasting
guesthouse
icons
cfirst
potluck
receipts
dumpling
blannana
eep
kneepads
trl07
blanco
sclices
volunteer
skis
---------
clients
vert
mapkin
very
robes
multi
eldest
plaid
balancing
busin
headgear
vhicle
robed
segway
scnd
milf
heaven
--
louis
ehind
botrotm
mild
frostingon
random
unbrealla
higging
pohne
wearer
xp
skim
meduim
locomotive
neoprene
louie
still
ass
cookies
widescreen
fence
benchseat
bg7181
sjirt
traveler
craning
cvs
orgasm
teachout
mowhawk
casual
rhondda
dsih
flwoer
lihhts
darkness
nana
dribbling
ast
gright
unattached
27305
4382
policemans
quartered
197
openbook
.............
scallops
windowed
femaie
patial
margherita
mvfr
elelphant
loose
vet
truns
lack
hchair
tracks
beansplus
pub
trunk
sandwucg
baller
strong
patterened
nailed
breastfeeding
arena
rbite
bext
colored
aqll
cg
278415
inspired
whine
creepy
1bike
peaking
drawers
amount
advertising
parkingmeter
superduty
sunburned
laves
womaon
..........
trainer
jrf
lurker
family
souffl
skoda
hting
bordered
unhooded
glitch
chunky
fromleft
aimed
trained
toys
chunks
actress
asweeamer
thinger
keyoard
elehpaht
qith
hapless
taker
takes
grirf
hawks
rollup
contains
rub
balled
almost
neckleace
sryup
towlet
mysterious
redgoggles
injury
autographs
lefft
terminally
chestnut
thrown
srand
yuck
propellers
ovular
browner
site
sunbeam
toiler
broke
browned
hurry
grill
grirl
hildon
videoing
gaes
otherway
sweeps
acts
offended
belle
peals
fronted
taps
broocoli
parasol
bewtween
furrthest
sufreboard
zo
crouisant
wraring
2a74
cowl
etween
rollerblader
dudele
crouchng
cowe
northernmost
refridegerator
pushed
smartphone
shapely
ccatcher
cucake
andy
cows
1inline
cowq
cowp
coww
inspector
hamburgers
firmly
comono
wigh
relaxes
cheering
yeast
ostriches
menus
chopper
zoon
vegetalbes
redist
weingart
frige
bussy
lrft
consumed
fq
fr
hoagies
ft
tried
communicating
4318
miserables
cloestest
110clock
fa
beigne
pr
fe
ff
hulled
horizontal
geometrical
mircowave
fo
a
planting
grizzley
blush
doritos
merron
read
cuckest
bugs
cantstopwontstop
throws
whire
simling
gloomy
beardless
dread
scaring
chocoalte
nibbling
inline
solidly
dream
eagle
ege
caot
dowonstairs
riling
remnants
help
300690
stays
faaar
soon
fabrics
beignet
littlegirl
wiener
bullpen
chicke
helm
hell
mcdonalds
kkitchen
indicators
ffa
fischer
talking
anorak
dun
carpeted
apricots
wishful
heron
actually
feel
dual
systems
coucch
peanuts
themostof
kidthe
brocoolli
forfront
fool
cef
rwb
yj
cathcer
nestled
dim
ya
closetest
foof
yb
petted
cupcake
peeing
axed
starbucks
fluffy
sweeping
towering
ys
yu
android
foor
caplast
bryan
slicker
cjq
holiday
fullu
payer
morticycle
furthestmost
fully
tricycle
}
trianguar
rightbottom
satupon
stopped
fulle
81a
androgenous
fairy
kacket
duller
barrels
injured
swaetshirt
pushin
colombia
p
hellmans
positioned
pillowbelowhead
each
bland
csamung
teat
todd
dush
beyond
todo
event
barrell
leave
pins
mist
colarband
umpre
miss
robert
surrounded
midsection
jolly
wordy
minites
tremendo
safety
cigaret
7
stiripped
utencil
blanc
poice
frontmiddle
smock
pun
bald
bass
protruding
dirt
pue
pug
dung
recd
puc
ahold
houses
reason
base
lingerie
brightest
put
tosses
sittingplayer
ash
pup
skort
pur
basi
hiorse
binoculars
dishwasher
broccole
wearkign
partically
ksocks
terrible
round
bloues
caption
american
turquoise
businessmen
daisy
dressisng
dis
coputer
rightest
ablue
rightiet
r4edsauce
drooling
spitting
bottrom
shirtg
badana
behinf
doughnuts
reflected
pinney
scrolled
elder
mahou
dominating
rails
muffaleta
croissants
neaar
sige
burguny
bassinett
ikea
maple
meadow
beret
utters
horse
broccolo
manpurse
blossom
turquise
banann
airborne
swoman
pinned
collage
eddy
station
policeperson
hurdle
sigh
bracolli
vehiclewoman
hundred
banana
squirts
girraffes
bowed
selling
undies
thirst
bowel
jamie
readies
houndstooth
airlane
chaiar
boredom
tfu
ariea
albums
samllest
tieying
chocolatecake
gret
grocery
tunic
sta
toliet
stl
syrup
sinned
towars
grey
shoestrings
outcropping
europski
bride
autumn
greg
gpr
leftman
garland
shirtr
gren
toward
weapon
crescent
mickey
udders
ktie
kart
texans
strung
ofn
organe
alongside
juicy
brocollie
juice
ackward
teddys
bridled
lecanto
siler
concentration
karo
gathering
cholate
umbro
lie
lif
jackert
sining
lia
writtin
lic
lil
lim
umbre
flaming
squinching
officers
camouflage
striangilar
lit
avove
lip
liq
earlier
torvalds
skiiers
umbrlla
headscraf
arks
sausge
towards
lettice
pyzama
needle
expressionless
quote
eater
tquit
macy
suitcae
prosthetic
kfi
bridle
fridges
eaten
kat
adds
borders
mack
approved
biddle
muscle
ginto
tonge
sturdy
mobile
moonshine
noone
biking
cleat
dollsin
electroni
dorrway
outhouse
heres
hints
cabniets
reddesih
clean
usual
aeropostale
tellow
hips
haning
bagle
stunned
cowgirl
666
league
cheerio
slapped
sheit
asce
jellybeans
pippy
brochure
stalker
velvety
topslice
hardcase
casoli
abag
cjicken
swetaer
knb45
qued
copyright
blackface
scooter
flesh
chiquita
guyblack
necking
dreedlocks
randy
romaine
morris
pretty
with5
lufthanza
circle
cupboard
scooted
hodie
clibborn
mguy
rigth
dominant
upstanding
wndshied
domestic
trees
speckled
eggs
capsule
treen
poil
woodpecker
pretending
bedet
speckles
during
imitating
biggst
chimney
clutch
nuzzle
catches
gloved
withh
othrs
sandwich9
withe
freaky
millenium
witha
perfume
antiqu
kinn
gloves
coullegs
gathered
witht
khakhi
squres
birghter
waters
feast
hodling
maurice
throwing
shroter
hauled
outboard
hogie
crackly
manning
roxy
descriptions
closk
sunglesses
close
geeen
zecond
baldness
cetral
practice
clusters
201335
probable
horrid
gree
wou
pictures
wow
suyit
aboves
abover
terrified
wom
wol
woo
won
mouse
wok
call
wod
vinagarette
conditions
pictured
piss
triangeles
flashlight
makeup
isuzu
numer
kneeler
zipped
shubbery
dang
scallions
readying
kindle
invisible
hubcap
understanding
bikcycle
kneeled
both
wee
boto
siitting
vicious
danc
laots
ceneeded
tux
parmasean
jawed
raisans
partiially
sufrboard
eggplant
buzz
vegetarian
mma
protector
stoplight
shirt3
cowtail
batters
ghey
magezine
jeff
battery
cibras
wgite
whatever
hotdo
header
fattie
likes
linux
vessel
ady
linus
moisturizer
bx59chf
dinning
blurly
coleslaw
cigareete
traingular
shinier
criped
buisness
damn
skewing
handglkass
collected
instructing
empty
spirals
garnished
sanders
lived
partly
combing
pinnk
packs
shave
crack
mturk
hbo
imac
else
anthony
adn
sandwhch
bight
gmr
monnitor
customers
clove
pact
friuit
utmost
orangeolantern
teashirt
hotties
bagage
rope
ceell
while
match
curving
leys
animated
pach
hooters
loop
cutogg
detailed
hbf
babbies
petal
textiong
refletion
bipedal
embroidered
00s
mointer
reads
wildflowers
furtheset
ready
firends
bow
sponn
gimp
nlb
ackpack
haldfoutta
shaw
anymore
recyling
pussywillows
belong
bathrobe
makeshift
blackhair
dest
asnowboard
bok
squiggly
grand
qirh
crumbled
cornor
thrmiddle
composition
unspotted
fishstick
lid
used
elephat
fatty
sidewise
txtin
pomegranate
graffi
overweight
sandwiched
backstreet
girieff
002
001
000
007
cleaning
barbequed
eeyore
aims
fenter
brussels
elephan
tufts
idling
ohldin
prominant
gv
cougar
older
scrunchy
docked
hanfs
wedged
bruised
cherokee
bkn
owww
mobs
posh
saulting
tarped
yankees
miuddle
frappuccino
bearer
afainst
significant
morsel
ddish
alabanzas
quarters
beared
coud
siezure
roasted
couh
praying
afro
plains
waxing
pairs
password
$
informal
sprinter
anove
caras
47845
waoman
barack
cherries
swabbed
scrunched
gifraee
n6594q
remaining
caraf
hate
...
ight
fend
radiator
bermuda
showind
showing
lis
directing
enthusiastically
game
motorola
beighe
sherry
crisp
bran
trigs
wings
translucent
painted
kayak
sandwitch
doritis
vests
inviting
defended
conrtol
pillar
toyota
donny
eer
bulge
ponda
eek
sofa
popular
patriots
striples
honeycomb
saddled
perked
sketch
coner
parade
brakes
crouchingg
mauve
fathers
fake
some
whitecat
coney
interlocked
scisscors
lips
broculi
slice
saddles
mustang
bruising
cornbeed
transjakarta
urinating
describing
cave
27668
dilapidated
unbrella
jacet
debra
hairband
pounding
slash
wate
excluding
backoack
measurer
chairn
akward
sweating
eating
achother
rum
peigon
booklet
rug
cirle
stem
step
daining
stew
squattin
fomr
feild
infrt
raspberry
smothered
barelty
objectwith
shine
bisecting
stirped
handbags
letus
classico
weaaring
withtongs
awwww
hodlign
boxer
stirpes
idk
shins
seascooter
fridger
ide
shiny
redest
block
showning
footage
confrontive
grins
hm70
diferent
tofu
encircling
taillights
subaru
smelly
hnging
rolly
carnations
girlwith
sprawled
rolls
countier
smirnoff
oclick
bicolored
computer
habitat
..
./
exlamation
eone
triange
girafeeeeeeeee
tesla
perp
passanger
bwoman
heritage
lephant
frizz
aqt
bananaphone
himself
bender
archery
ditch
backpak
collapsed
frost
comouter
specialty
catcherslice
blackcup
properly
reed
authority
newer
branch
scatting
brimed
pitchure
dull
reen
info
thru
ypung
skull
tsheir
sounds
....
refrig
fdr
leaduing
truckthe
carrot
similar
clear
motorsysle
hrose
peope
inch
adults
ulgy
snapping
innertube
flush
browny
doesn
lavendar
pattered
umbrealla
taoasting
surfoboard
excel
1890
forelimb
cotton
nab
tongs
sullen
63
hyndrant
nad
nae
gilr
btwn
seagreen
gifaffe
nan
pronoune
nam
nar
freestyle
sonicare
siracha
electrical
continental
tits
grind
department
aprons
palte
pandas
eerily
smiler
smiles
draw
apparent
spectators
rester
crouching
smiley
fewest
lunging
william
rested
showng
actively
umpure
drab
oneworld
chameleon
dudde
surronded
structure
frsh
backis
e
unclurled
earp
dvd
tailpipe
towords
bleached
heats
trivet
chardennay
bleacher
everywhere
svt
svu
showwing
backin
evenly
gw
skatebpars
gu
gt
x95
martinair
motorhome
strabbery
kats
summo
izza
sketching
gg
desserts
unshaped
vluw
ga
n447
go
barbecue
psycho
gl
yellowman
compact
unshorn
cozily
teeths
sbove
cnter
resrved
foodball
chinos
teethy
luggtage
wizard
suits
oclocj
oclock
shortie
cyclinder
chessy
oclocl
dickies
suite
agaisnt
friendly
ulgly
masked
kcd
flicker
centerslice
ukulele
logos
fishnet
rti
sandwhiched
kitty
leafless
trolleys
wave
unblemished
octo
handlbars
wavy
aproching
trough
cellular
useen
telling
dumptruck
tenet
chairpad
nausea
kobs
pinched
crowed
stiff
snowboards
gender
button
armpits
michael
doublebus
hive
boywearing
queen
roku
sutcase
mouthful
shish
shirttails
puke
shorest
picker
oddball
booty
carter
denimm
ze
cds
plot
za
boots
waking
jump
muffs
booth
picked
unwrapped
denims
aplle
cutleries
lmost
click
pickel
zs
elelphants
sausage
cupcakes
plays
playr
paintings
wallet
colonel
edifice
vampire
corsage
cell
bnaana
playe
applesauce
poles
playa
selecting
pristine
womeon
;
headon
dore
oricon
backgroudn
focuses
shoreline
broccolis
stance
liners
vege
commercial
tombstone
greay
jqacket
raspberries
shortys
broccolie
weirdo
impire
pancake
doubles
ponytails
shucked
dirver
prson
bathsuit
detached
saddlebag
carhead
bigwhite
lawers
elepha
smarties
circly
gooose
stepny
romote
.......
whisking
640
chano
1245
chopstix
vinagerette
chang
hexagon
pasley
wig
examining
firewood
unoccuppied
claim
pitch
win
pinkies
ceasar
licnce
wii
wih
homepage
wit
neartest
veterinarian
........
pilloow
couchb
ouline
singing
couche
cloud
umbrellaon
camers
poerson
crap
snoop
remains
trangular
flights
breastcollar
performs
seccond
camera
bobble
crab
vehicle
cram
hiding
remaing
fride
reflects
cheeks
assortment
cutt
popped
tabul
formally
weener
tomy
tennis
tangerine
about
visibility
confused
rubbermaid
flowerbox
palettes
talks
lifestyle
fixking
strwabeery
boards
150
emptiest
crosses
hornless
arched
salad
phine
703
tench
ride
whiskers
plums
bavck
donut
butterknife
archer
crossed
voodoo
salat
donur
surfboad
meet
drops
coliflower
meer
control
wishes
outstreched
mustash
motorcylae
elhant
corenr
halloween
gaint
glitching
starring
pulling
passangers
wonderful
darkening
215
skirt
1a31
gireaffe
stemmed
chairbehind
arraingement
compurter
mocassins
arrangement
located
burgandy
200999
elenphant
milddle
bandana
dadey
americal
circular
fare
puller
stray
entree
nonblurry
farm
peeling
diagonlly
kipping
peace
imge
fart
turnk
farv
strawbery
prance
apperaing
elepahants
belongings
spelling
infowars
sokcs
coloer
crabcakes
ottman
conrainer
midedle
pansies
bronie
wittgenstein
powerpoint
scoop
6039
visble
lleg
scoot
vitdela
catcheryes
bakers
x25
flanked
keeling
fastest
shtrings
plaate
bathing
submachine
creation
piink
fattest
clockwork
pkate
surfingboard
basement
paling
boyclose
hand4
docile
ticket
costume
baqby
cruise
giutar
undersandwhiches
pervy
playiing
aveut
bedsheets
blake
outer
staues
backery
paths
broom
notebooks
wanker
compyrer
runnner
gent
159
3h86
youngster
stenciled
womm
airlplane
womna
pixel
aviators
geren
ef03tww
lpatop
skater
tailfin
hujab
surrounds
frontal
adidias
pretezels
fluff
tribut
damages
025
024
catcher
mblue
frony
cased
hands
ootfirstea
feft
vegie
sittring
brocolli
plantar
hoizotal
b379
skwhite
env
divider
university
stading
candels
dosnt
slide
paddleboard
mode
cuces
crossing
mtf4lyfe
shaking
manican
buildingleft
loaves
ankles
finair
attachments
map
nightshirt
globe
707
700
bussface
multicolored
sandw
broghtest
sands
measure
hlf
theywillquityou
globs
sandy
explorer
butch
banch
tennise
giarafee
actor
armor
armos
occupied
bpttom
containg
siverware
mere
tennisp
chacolate
horizonal
playground
requium
wich
custard
cause
spilling
ecg
cradling
umbrella
trashy
adjustment
watermark
eco
unpolished
diagonal
clenching
snk
ablack
attending
completely
jill
cowbell
umbrells
x
celtics
hairjob
sneep
oguy
acket
cacasian
tsongas
tippylooking
chritmas
gradiant
timey
lone
trainin
fingersip
route
whearing
ask
timer
keep
counterpart
stride
shred
behin
wading
stainless
griffate
upire
vegetables
mad
softer
prospective
windsock
baackground
mag
evans
shortd
fading
firefighter
backj
spoo
suckling
disembodied
attcks
speedos
bitch
cchecked
drinker
art
precisely
quality
strped
pacifier
fella
management
dishwashing
neckbeard
asparagi
bears
dove
ballloon
terracotta
wrapper
beart
herky
clost
pantds
metors
sabrett
motorcyle
wrapped
chartered
guyp
fairest
blankie
malibu
trave
rse
exactly
hitching
grety
ridgy
bieber
fuzzy
taptop
herself
flourecent
updating
neck
catered
beh
ben
grillin
dapple
mazola
banananas
clockface
beg
bed
bee
eting
mopads
arc
beetem
6th
ber
dumb
kjacket
providing
gase
sq
kitties
leftzebra
function
raning
sweeteners
lightly
tabs
math
learned
carrots
slighlty
hairstylist
carrotw
tabk
stike
skeezy
tabl
need
comfort
sprinikling
border
sacra
tabe
soulder
sk
microphone
showinng
rockingchair
scres
bilke
lacket
tries
able
si
purchasing
arm
instance
sh
arn
chololate
scren
so
lipstick
sheepin
visor
closest6
medals
blades
motha
purpleglass
swirls
veggys
mmmm
onf
chasse
aww
nametag
sewing
camper
fister
kickstand
buggygame
montana
connected
overlapping
dr1
2565
cosplay
expired
gallery
awa
ddueede
enthused
monutor
stereo
cleats
url
closestb
urn
upset
scrren
sf
abovew
scrambled
hunks
largets
cutlery
fartheset
closests
businessman
skunk
chamagne
mostleft
closestt
bkackest
flagman
cdress
firmest
parket
cener
spple
kiddie
topest
indoor
crate
anyway
12o
watch
tanktawp
vetical
stteal
ottoman
delivers
shoes
sauerkraut
creamed
ariel
based
unfinished
tire
tird
(
winner
battbrown
grocer
basen
bug
pomeranian
girlin
bases
creamer
shinny
employee
2012
girlie
partially
trunket
plywood
whle
slows
aquos
sprouting
tbs
overall
5143
stovetops
sipping
tbh
122
skol
joins
probably
128
5429
sassy
slinnder
gray
evolution
chilidog
sht
umberalla
trucks
slimey
grap
shy
anxiuos
dishing
motorboat
lst
squater
whiffle
unfed
overflowing
truckc
contain
shi
uniformed
backof
graf
widow
spotted
ipnk
official
bojangles
solo
hardwood
tossel
shake
humans
paisley
checy
operates
peelings
whiote
redmeat
powder
laddys
freezr
pirched
statu
placed
ubrella
pointer
missing
labled
cuty
unshaven
silicone
written
computr
raises
lue
tyre
horrible
converyor
addida
neither
flickr
suire
centr
tore
allmiddle
converting
munching
mags
koren
mushrrom
limbs
kicking
key
receeding
disconnect
screesn
ket
scietific
pilgrims
thank
childseat
hits
middlef
sniff
beenie
middlee
holidng
condiment
aqua
spray
presentations
minature
middler
retro
gazebo
staniding
hite
ternen
snowbibs
middley
jersey
directtv
derping
torn
spandex
gitl
thebaseball
pouches
denise
beteen
agreed
rabbitt
amh
peporni
cider
incolor
stains
willy
quit
sari
yay
tread
share
pixxa
addition
zipper
knurled
bricked
polka
coaching
cent
jeens
yam
nurses
suitxase
yan
carrrot
treat
yak
garter
sandwithc
quin
booksack
quik
uplifted
hernandez
backgroubd
pic
controlled
hoisted
greenie
3501
listing
sunexpress
ote
backleft
topless
tieing
spaniel
controller
mail
otp
boxcars
digger
shameless
king5
pix
main
panetary
lookalike
poach
televison
zebralooking
harder
dorm
laptopwith
sunray
ghirl
replica
stromboli
kabobs
presant
mythology
toothbrushes
tabletop
strattling
airtank
taupe
recliners
chucks
bote
wiwth
tocatch
coating
surface
hearten
swinging
agains
cattcher
bucks
lambs
conical
farmost
meanders
kneelin
shooting
loweer
tropicana
tonuge
begal
balloon
furest
mthe
purlple
skakter
report
parts
speaker
northwest
stainding
blight
party
nursed
sandiwch
coushin
skatebarder
eleaphant
contaier
fireman
boxers
woodedn
chare
jacekt
righmost
ona
sarcastic
onwhite
gestures
mointor
spree
magician
elphient
cuecumber
lcok
leamon
shortcake
surfboard
unifor
i
againt
obstacles
well
swimshirt
bootom
bott
chinstrap
khackis
flexing
chappatti
47
awning
markings
prosciutto
spherical
taller
45
spastic
outrigger
saucepot
acar
paperwork
trombone
hesd
tedddy
darksuited
dose
savanna
distant
virtual
headin
moitor
lauren
linin
titty
tennes
garnishings
headed
detal
ketchup
sleves
oat
extends
teller
overcoat
gaiffra
tennen
matched
balloons
kick
wsoman
bottome
measureing
guerrero
surfbaord
cholula
sketcher
viisible
rind
crushed
palo
262
leapard
bottomw
affixed
harbour
bottomr
bottoms
propeller
immediately
intersection
sittingin
envelopes
prominent
smiliey
lincoln
glazing
freckles
renegade
lost
sizes
starry
spingkler
rightward
clown
er03tvv
sized
leftish
unfolded
dresses
lose
silverplatter
corrot
refugees
page
lager
lages
shed
xbones
glare
plaidish
motorztv
twitter
beanch
library
sandwi
dudee
chocolate
lading
giif
shep
trucker
home
liking
peter
expresso
drizzle
squigglies
crumpet
assisting
curley
palying
competitor
hesdband
surgerical
toucher
brcolli
broad
kettle
cabbages
elephantas
grinding
goats
dives
cradle
deserts
coolers
launch
oclcok
footprints
?
duh
hadle
coated
parquet
reaching
goatee
yues
rock
choker
suspenders
amer
avacodo
odly
shopper
cmera
3p
casilla
offset
amy
frfont
choked
cropping
breadsticks
palcemats
woodvale
peddling
jokey
staked
faman
duo
amost
leanining
onder
rodeo
exposing
toppings
beige
cranberry
doted
puppies
tongue
wedgie
shampigne
woring
pastries
wusrt
equally
overlook
cloosest
speaks
raquet
political
dresssed
washington
chula
due
cocoa
pplant
sysmol
dug
primay
quaffing
utility
jercy
flooring
gerbil
buttermilk
wondow
nasvy
museum
gradpa
laptown
inner
buttcrack
sidedishes
drumstick
formed
girsaffe
suzuki
hoofs
cricket
growths
north
glob
stepstool
elbowon
hr
hs
hp
pe
triangular
ht
eaf
designated
armory
hh
nobodys
hn
ho
pticher
bannansss
sprinkling
ha
hf
orioles
hd
he
celly
xlosest
watter
chutney
glaesses
cells
brackets
lting
signed
ribon
displat
carriage
gire
stories
skyward
cello
rught
signer
greenthe
piece
display
chip
boaed
foster
marketplace
bakes
songbook
beatd
watar
universal
fingertips
kisses
kisser
cutof
twist
utensils
baaaa
penne
0000
circuliar
kissed
tpurple
worse
balcony
switchyard
appple
tg14
gwynne
ingredients
formaggio
fencing
serveral
glasess
multifruit
girk
talkig
futur
stumps
kjaki
suspiciously
mostbowl
fince
pacificnational
toughing
spottedcup
cheesiest
juping
stat
sodomizing
star
climing
waves
leaing
wamn
meddium
pleft
stay
bottorm
stag
foil
gadgets
stab
dragonair
additionally
nintendo
stan
sandcihn
foid
pinup
friends
motocyle
motorbile
cookbook
girraffe
hnd
devour
samsung
baked
bcf
dripped
ripest
oncscreen
forsting
rounding
portion
extras
dippere
somesones
buoy
bcp
commencement
glimpsed
blsck
poised
powdery
whoops
graffetti
traffice
knelt
sakteboarder
obstruction
straws
asian
asiam
grills
nearrest
asiab
elelephant
captain
eleohant
samich
baya
fronts
containter
ballboy
visable
segments
swan
407
knofw
ficus
presents
bloack
parsly
yellowshirt
murky
teaspoon
vertial
sorrt
recycle
teaching
sorry
bulkier
compupter
reachin
fists
cruising
rescue
void
tablelcoth
railways
relatively
vase
atrick
haiwaian
stolen
itseflf
straghtening
vass
acctualy
sleek
teadbear
vast
look
rirght
centerline
baking
molesting
waldo
clothed
upd
shlef
companies
upc
scateboarding
bnsf
au4
cholesterol
uncooked
refree
guitars
heading
upp
clothes
snowpants
plateswhi
force
quilt
pattened
chcolate
lavender
streetlights
hsirt
fitness
gator
dodgers
217
spoonful
batterys
hoddie
wiffle
htotdog
cactus
willam
geraffee
even
wyatt
athletes
hairdresses
baskests
wreck
inbewteen
applliance
meals
sortest
bikini
hazy
nea
spoted
lights
rileft
nex
girlon
aspirgus
fetish
construction
megabus
onright
banian
unmberlla
messanger
med
meg
1130
barometer
carebear
healthcare
pancakes
shearerwith
dres
neckline
disposable
wodd
smudge
broccolini
plaayer
ballplayer
feeding
q11
leanign
mes
fleet
active
vegetive
100
101
106
107
105
dry
miilk
withansports
whill
bedding
rests
oman
piercing
guide
buckles
taped
drk
indentation
permit
dra
mime
pack
vlock
let5tuce
chunkies
chunkier
jacketg
heeled
facepaint
intensely
slicer
slices
reagan
awhite
urninal
jackett
standin
busses
guests
jackets
hasbrown
slicen
handlebar
inhaler
landscape
theory
comprised
tween
squareish
headband
army
jaclket
standi8ng
arms
seventy
cali
ellow
lookichili
overhead
calm
bdsm
bead
robertson
twirled
calc
type
tell
calf
arma
currled
kayasaki
please
slice3
expose
slopes
wars
loong
lunge
warm
pecan
adult
shelters
bangles
silouhette
ward
ware
9748
blindfold
rightt
flora
waterfront
room
kraut
rights
hooter
setup
rollerslate
righty
roof
roog
florr
movies
00p
airindia
foliage
fribee
rightl
rightmans
righto
root
ddle
lifesavers
muv
vodka
carsus
unmarked
give
bresd
dividers
buckeye
laughs
aroud
honey
surveyor
foods
homie
illuminated
refueling
gleefully
grene
sideline
inhand
january
saty
9o
leftleft
nohat
backgraound
braids
bnike
amazing
kittty
chicks
umpher
leftblack
kickflipping
answer
butting
panasonic
scooters
cornrows
obscurred
sato
parsnips
lioht
becky
clicker
hslf
cherios
cadillac
manuals
abdomen
lerft
weatong
bedon
bkacground
ove
xgames
president
sellers
wilkins
lesbian
fedora
tothbrush
purchase
postergirl
thirf
reflecttion
weekender
grant
fishbowl
404
righting
follwing
owls
checkerboard
everyone
every
streeet
vfs
sillouete
ec
thirty
exotic
deco
chrismas
chunk
deck
backrgound
glassing
sheltering
slicee
broclie
handphone
notebag
tword
dougnuts
windshielf
windshield
carrorts
before
scoring
wnat
position
baybay
frisky
personal
soaking
leftguy
sid3
toolbelt
blackened
crew
rbald
differently
cloasest
chapel
housekeeping
prius
shag
caucausian
tickets
aston
anim
ecko
jerkins
blondest
workout
laborador
aoc
runny
ong
currrly
unrinal
tentacle
to9p
ond
cuttint
glazed
fellows
bluish
weenie
smoking
hishest
innings
intwined
leaner
fringed
meat
chocolaye
lightswitch
finishedsopha
lucy
mountd
faraway
panini
airfrance
leaned
roast
crosswalk
mounts
acoustic
ducking
sliver
side
bone
luck
gargoyle
tatts
calmly
dout
chillaxin
hallway
francoeur
formica
tatty
ligh
principles
middlezebra
micowave
vote
dawg
wiith
doug
skind
pinstriped
dawn
sking
qhirw
enclosure
dfress
prange
brukmann
motercycles
velvet
huskie
axis
tales
taler
sparkly
elephaqnt
rivets
content
sparkle
pana
roddick
opel
ihop
bellybutton
surprise
ramican
rblooming
hardbacks
netgear
seersucker
turning
linear
entraa
recipt
bldg
ascending
ctwu
247
ramos
thatis
243
242
desgin
bonut
bleecher
248
blinders
tabasco
aisle
saggy
jacketless
withput
naruto
sceen
starts
dragging
brpwn
ist
grpund
barb
ish
isn
frblack
signature
limest
isa
loud
tufty
commuters
laggy
naughty
features
1152
veritable
ladsy
skeiing
unlit
walkers
buttock
hook
featured
warped
graps
disappearing
comforter
jjd
hoof
popsicles
hood
grabing
anyone
008
broco
hydrant
girly
spinach
girlw
swaddled
picher
girls
twisted
phoner
girll
pirple
girlj
brocs
hollywood
girld
girla
closerst
queue
offood
wessels
marantz
fiery
dimple
wieners
bouncing
gym
swoosh
nife
packback
trippy
foccacia
2at
olcok
sammie
geraf
helen
somone
holdinglime
stocking
hadns
begins
spoiler
tities
upholstery
dawkins
giraffeee
soonest
heans
hearth
meatshowing
useing
silly
speaking
hottie
guge
placemats
balsamico
mini
sees
pruit
quench
blackjacket
ywlloe
modern
mine
ginger
motorcyvle
shiertr
seed
bllocking
seen
seem
mins
middleone
tells
couchuy
goonies
lightblue
featurede
horde
slipcover
stoplights
hoode
specs
bovepepper
hoody
outwith
chesr
caulifower
funning
sleeper
hoods
fingerbowls
stoops
nieck
giraffees
loneliest
thinnest
orangeish
sliv
chihuahua
carrotws
tye
holdering
umbella
mashed
mario
regular
ina
umbreela
wedges
blua
behincop
konstantin
n785sk
buisnessman
zealand
massages
doh
don
doo
trowing
doc
alarm
verical
m
dog
breathes
shrit
symbal
emiddle
troting
definitely
principle
braed
colander
boondock
mildred
dow
dot
sunbean
sandiwich
planetary
beaten
sprocket
probe
buttend
ending
bespecticaled
liza
baack
poison
stepping
nevada
mhore
fluffiest
tohers
shakehand
judges
northeast
closeer
closees
explain
folded
tyke
cripple
sugar
celery
cantquitme
cloests
reception
stabbing
samall
hotdog3
deepthroatin
folder
foldes
takeout
lday
disconnecting
wearing
wearinf
tiles
wearind
colorful
10
cscreen
flowerettes
stov
toll
stop
grownd
coast
patted
12
watermelon
secon
pallets
9pm4
smug
wheechair
pretend
footrest
swarter
suitecast
plymstock
bat
pizzasome
bar
bas
carott
giraafe
politician
polkadot
16
frontonright
baaalk
dachsund
disco
baf
bag
bad
discs
bab
bac
18
ban
fronttall
seaskater
giraff
girafe
ears
lettering
dolding
mcglasses
withou
witout
testing
tahts
donet
cocunut
owman
mature
wildebeasts
cneter
midst
subject
02
03
00
said
06
07
04
shaven
sorta
08
sail
shaved
artificial
prince
wetsuit
protected
olympics
slighly
spiffily
pebbled
sorts
shaver
scraf
sheeped
warrior
lazy
bodied
omg
wears
ome
backapck
adias
checkard
slowpoke
fisrt
ahirt
housed
luggaage
copenhagen
upfront
pistachios
picking
stylized
sophie
misrables
sugary
liqui
roasting
janitor
jiraffe
eyeball
gramps
against
dounot
smaler
puffin
luggege
tractor
cpomp
ung
pate
stopsign
0o
eastpak
uno
backgorund
gps
presumably
motioning
fillmore
tothpick
leftsubmit
bananans
twinkies
height
whisper
lanterns
cchocolate
grigio
85
moest
3901
lttle
sandwicch
tint
tins
nicer
puts
11747
frist
dusting
patrolling
parsley
erect
cyrus
ting
tine
strappy
royl
interest
basic
basil
basin
lovely
threw
website
studs
casseroles
deeper
tollet
greyhound
government
sunshine
cartigan
bushing
kudos
tapping
hollowed
personally
bworn
166
naner
160
spindles
163
bowlfrom
exception
tank
sly
reddish
tand
tanb
nextest
ajar
-------
ugly
near
melted
neat
motorist
aeroplane
reddist
balance
anchor
laoptop
cuttinga
iy
20099
seven
cane
bustop
backrest
cann
is
sushi
it
assalt
computar
ii
wilsons
cans
granma
in
strupes
ic
seattle
ie
cany
grown
walkin
waging
bottles
stein
struture
mitts
make
i9n
issmiling
donning
who
drawstring
belly
vegetable
filtered
sideliner
sidelines
maks
grows
volkswagen
entitled
bearded
scarft
skation
kis
ella
browsing
kiw
reacjing
kit
rendition
whilte
elly
waterfall
garlic
warden
bloomberg
unicorn
jealous
pekingese
strikeout
overs
kif
kid
butter
sallad
windy
choclote
programs
changes
whicker
fashionable
smokes
smoker
bedspread
lefy
horsre
sripped
does
butted
washbasin
lefr
flops
pooping
left
swag
just
sentence
yea
warmest
sweatered
yee
longish
aside
fighters
ambulances
bandages
etting
human
eaing
facts
yep
teerth
instriped
tattooed
yet
cheddar
amour
inyellow
bridegroom
rubber
nudge
marroon
sunflower
1772
skiier
character
tcomputer
remaingin
youngsters
streets
ambrose
broccollli
contestant
save
largeboroclli
trimming
noticeable
chives
pulp
swetshirt
sailors
70clck
flatulence
oclaock
ope
supervisors
pinaplle
backgrounf
backgroung
background
3po
clickable
opn
strap
jeean
personalized
hatchback
moulin
v3pm
picutre
3038
laughter
visible
janky
performing
policia
geico
arrivals
switching
leftier
zombies
ruggles
signboard
nudies
prepping
clementine
amherst
mate
deak
www
dean
bri
pacquiao
flapped
tigo
darm
dwarfs
elderly
platters
wihte
skinned
fingering
dear
betw
lookig
glance
shapes
brd
cuttleries
carts
croched
chiwawa
frisbbee
rancher
entertainment
flounder
onlooking
trunks
hollondaise
cathedrals
nipple
skateboarder
cultivate
puprle
burd
tartar
bold
ww2
menequinn
burn
boll
extreem
clunker
sleigh
sift
firemen
bolt
bolw
burr
keeper
antony
bury
weiner
assed
tyres
puking
dunking
optimistic
yelling
ribs
submarine
essential
magazine
latke
mccann
studing
strpied
grdiii
seabird
luan
emcee
.\
rght
thinner
subs
direction
liek
selfie
crochet
lien
rearview
down
fumes
omlate
baserunner
blun
carving
hydrants
errr
naxt
frightened
tugging
microwav
cones
steamboat
ploe
cities
apartments
weathered
visage
initial
chevalier
lowering
pages
clappin
victorious
cigarrete
unifirm
stalk
deckchair
tennie
teddybear
fork
bouqet
lowe
offering
forl
squarest
batman
sweatsuit
fireworks
swishy
landing
ford
marinara
coch
propellar
diaper
229
blurrly
bananaplaced
upholstering
225
224
blbo
mouthed
lilies
pavilion
uge
sprigs
ilttle
limousine
attached
keyboar
lorry
whiskey
marmalade
sk8board
engaging
zara
daddy
rasberries
hooded
refelction
laduy
slidding
shin
sticks
classic
underpants
covert
sicors
graff
covers
sale
rainboots
qwerty
mush
longst
fashioned
nleft
muffins
floating
shit
tose
headshots
relections
marking
handel
molester
tardo
tossing
handed
numchuck
tagle
elepahant
digital
holly
hangin
ribbons
applications
camaraman
broen
allowing
releases
swat
sling
metrobus
handicap
pizzaa
felt
auduboons
diet
stockings
pizzaz
fell
gandolf
award
budded
vully
hahahahahah
pizzaq
russh
pizzas
glasstop
died
uneaten
billion
femal
brade
jewerly
potato
horizantal
blacvk
coyboy
daily
freeze
jacket
gorilla
grownup
fsu
jacker
teeth
wakling
pellets
jackey
restored
sittiing
debre
managed
golves
tshurt
themed
chattini
skip
wiii
skir
souls
brunnette
skii
cougars
manager
mile
peole
andbeige
skin
coerner
shortist
bomber
milk
cobered
conditioner
motorcylcle
anticipation
yummy
lemonad
outdated
elizabeth
irlegacpe
father
disgusting
0
marks
blaclk
must
vehic
pleasant
chocolet
shoot
contaniner
string
shirht
streetpost
synchronous
grayish
guuyy
tacos
nadal
hoirse
hutch
daark
yellow_green
forked
stting
unno
illa
wore
orahnges
biceps
boko
placemate
staples
bikere
limes
did
die
races
dig
mading
wurst
prob
hooray
item
shirtkid
grimace
cheesburger
specialt
dit
barccoli
specialy
unpackaged
dip
7cl
roung
rounf
sillouette
starwars
olympic
gottle
nineties
seasoning
frissbee
yougn
sneakily
1125
1127
draping
diapers
talker
hazzard
run
230
8691
sunglass
yoda
snadels
mu
ivory
zerbas
sartre
filler
takin
nonreflection
sweeny
shrts
lennon
ddroylost
flogging
312
drunkard
bunchs
sweaters
filled
hummer
transportation
dwarf
bandwagon
boittom
pizzxa
mussels
clerk
openface
stallion
ridin
french
stainlees
chaiir
patience
tusked
greall
biggeer
slop
frosting
cieling
flowerwash
wait
box
boy
knickers
yessss
6033
canadian
shift
bruises
bos
bot
bou
gurad
volkswagon
focusing
finnally
midsandwich
assists
10ish
bon
boo
raccoon
boa
bob
graffe
bod
boe
massage
bog
ceral
tiolet
teenage
dick
useful
all
ceenter
unfirom
lewinksi
lamppost
individuals
destop
assortmrnt
ativ
elephanit
inbetwwen
pitchers
sausauge
tommom
everybody
dinette
spagetti
taleft
praking
layng
sloe
lockers
hornsl
thrd
pokadot
dude
tears
charles
france
insides
creamy
terrarium
bazar
ayy
flaunting
visib
swagger
cheescake
abve
baek
ugky
9clock
fgiraffee
weearing
tope
phillies
bbaba
ooh
----
learge
bbaby
caressed
pursre
olive
anbrise
stitting
crots
blinds
gorund
fly
walled
thermos
tokyo
deformed
hahah
fade
androgynous
soul
atheltic
overnight
soup
sour
caserole
9th
waller
fla
making
makind
hairnet
bites
feature
arriva
nearest
crazy
slevve
reflector
yno4ajv
hippo
womend
452099
fuck
agent
greenest
sample
drawer
firnature
battered
boths
neighs
spanning
underneat
guy3
clair
pink
hinge
purp
sugars
annd
dingy
pinl
brownpantes
oslo
necklaces
tailwing
ping
range
sundae
jacketan
piecce
till
sunday
aroudn
sword
skates
tile
nyc
nighttime
spa
pathway
pint
146
pleftink
guym
145
142
mat
140
141
may
max
swaybacked
strpes
accessory
busaras
helmut
mac
mab
scratch
designed
guyy
hombre
scalloped
mah
tablecloth
guyt
guys
mal
man
kama3silver
underone
mommadukes
outline
nech
pohtographing
basked
maybe
omea
brella
booths
introducing
hichest
tale
switch
espresso
wlong
habicht
groundbaby
basket
tall
nect
gesture
nearly
microwqave
cute
bjig
shield
view2
seeing
longsleeve
entryway
pointed
wishing
manholes
entity
fzce
chickpea
moooo
cuts
extenede
mifflin
standking
bototm
prompted
coumputer
jess
texan
group
monitor
took
northface
smoothie
interesting
eyse
yorkshire
groud
maid
monitoe
gato
kahki
policw
maillot
ours
creamsicle
secondary
afloat
texas
bubbly
jearsy
within
moibile
partilaly
tucked
bein
killer
136
lleft
solomn
towtruck
whiterear
lunch
touchinf
touching
anmal
mismatched
safari
escaping
binky
sttingin
bullshit
limon
pizze
ledt
muticolor
playin
artist
arrows
tallet
48214
obsurced
zeebras
peasant
middloe
raquette
825
hardhat
826
pantsin
vogue
girt
sidewas
girr
dries
elephants
zookeepers
elephanty
elephantz
undercoat
girf
mustaches
cherubs
leftymost
painetd
gira
vodoo
curtian
pupppy
plaqs
oclck
treetop
carlisle
gonzalez
living
staw
jackson
3rd
greengray
draining
grafitti
pedophile
coloar
delivering
womaker
alightly
musffin
ymca
pokey
arnhem
pizzeria
dominate
sensor
correct
fatguy
goth
after
monster
handswe
sideways
coloured
sqaut
garuda
pumping
fuschia
walnuts
bringing
knivfe
california
ork
staircases
brownand
campbell
ord
ore
orb
clohs
union
advance
underwear
jaket
splattered
waiter
pepperonu
unrolled
blodgett
iinside
spinnach
thiny
watta
thing
funky
mesh
roofline
pepperoni
addicott
yest
lightish
think
first
suspender
cheese
placing
thriangle
fleeing
snallest
pakkens
crib
hygenist
gkasses
rachet
parsnip
suspended
carry
promient
gough
cheesy
girraphe
cris
cannnot
1s
plaing
gunther
plaine
arch
barrack
creamish
pixture
littlw
grayest
fuchsia
littlr
alfred
waterplane
riite
persion
arck
foregound
1o
palomino
paved
eyes
pepperonies
decked
sidedish
jmping
memo
bruh
pentreband
piglet
biike
eyed
boby
butt
blurred
flapping
lucagage
camouflaged
11
persaon
13
cracks
15
14
sailing
tapletop
19
vines
skatebaord
browning
spiece
denium
snoozer
handstand
victorian
remort
knives
matteress
were
tractot
gigantic
......
notched
lugg
captains
coconut
lick
dollop
stubby
rummage
godnw
occupies
csj231
dash
winding
counterfit
supersizing
pastry
spectacle
portrait
risghtside
nazi
triying
zoe
these
speakers
sleve
squar
cheerful
vestments
advil
answering
pckets
shocked
canton
catcred
angeles
picknick
interior
performance
glassware
wonder
crapper
channel
ultimate
201
wilted
fops
202
straightening
bakpack
pail
normal
track
cheesecake
greem
paid
blackest
burito
assault
motoscooter
sheets
billow
bowels
carasole
brigth
tlkn
shcool
lineed
bananbas
viewable
youn
especially
fills
littlewoods
napkin
bleating
order
leftyest
fartherst
redsox
pebbles
greed
bending
snarky
jarkin
thot
licht
gourds
shop
shor
shot
reef
show
2307
ornament
filed
wifebeater
bananagrams
cornee
corned
aventura
bedside
shoe
pump
cornes
corner
beanei
zeabra
data
curled
teeny
specifically
asperagus
zed
behing
dich
crapped
treasure
cheeseburger
plumb
either
operated
blacl
black
raglan
blach
anover
blace
cuttoff
redhed
smalest
plump
ranking
yogart
muni
paperback
get
mund
darkets
stomp
monther
midriff
spraypainting
katle
spraying
unimportant
irt
framing
2md
hippy
xcow
guyb
neckerchief
vender
blends
gel
sideway
timepiece
seared
utd
girl
keyboards
businesswoman
girrafees
median
teddies
yield
ccenter
keyboardd
slideing
miles
source
nostril
miley
finishing
flamingos
beater
podeium
ence
crumbs
zigzag
sear
knofe
ushaped
ench
blutypwritter
seat
cocktails
sludge
calibubn
mounting
seam
cather
calendar
stalking
raddish
girrffe
wettest
kurt
puma
camping
sleepin
closedst
nets
stirfry
kool
banaban
mayor
gage
dunglasses
behind
behine
diamonds
beterrn
chews
geometric
reading
across
oversized
halfly
campaign
parkouring
whitesh
parent
betwen
tup
boxwood
hydreant
piccadilly
lpswich
jr
dome
tui
ebony
lopes
firepl
jk
whitest
tub
killing
circultar
frnt
tug
dates
parentheses
rugby
sweatshirt
tuck
saratoga
skisuit
hightest
gilleleje
tous
tomaties
broccioli
straightish
holders
jtellier
252
breakfasts
among
stretches
stretcher
ercrom
stirrups
sepik
obese
eleepahnt
witn
leftfirst
k377
suger
proff
stretched
dummys
fucker
dishwahser
anyplace
grond
awsome
porcoline
406
barry
stanidng
frood
undershirt
quater
fulling
mark
rightmsot
workshop
mars
shakers
vechile
smallll
corful
thethe
mary
geyser
veggi
vehiclwe
spare
aireplane
gripper
unboarding
streching
fronto
laptopo
squash
laptops
offers
wake
bmw
servicing
bmx
driver
pattie
those
^
sound
sqaure
stacked
disconnected
turtles
brockli
talller
preson
whitestuff
triangal
caase
ggreen
deflecting
sunlasses
coca
coco
hmmmm
slapping
interpretive
margin
jeaned
nondominant
troy
middlw
middlr
giraffw
beens
rubbing
froot
cash
grdii
deliver
sleeping
middle
pressing
outplace
rainsuit
ferns
straig
hijab
obnoxious
pedofile
ferny
bedtruck
giraffs
spaces
bags
sami
arica
pat
l55
paw
colorfull
pay
bd57
bafel
tour
same
seasonings
didtance
paa
pac
speech
cabos
peopple
bage
buritto
patrons
struggling
halfpipe
syutcase
outskirt
pan
workplace
m34
oin
clozser
fartest
billabong
inviable
pooched
spaghettios
commode
y133
assist
munch
kubs
fromtop
pinapple
middl
running
tamborine
geishas
climbing
oit
flexed
resin
weave
refferee
break
drain
bag7
ramirez
doves
roughly
dkk
hidding
rains
bicyclists
bottle
creeper
bumping
catheral
amazed
ons
gates
animalon
icream
nacklace
pcoekt
money
fatties
rightboy
presented
imprint
nonglazed
pissing
jocey
liquer
pastery
gated
cornered
accross
blackshirt
smith
wifes
drinlking
bottons
jocket
clueless
ruight
grouped
mcdonald
pupr
bussel
nap
borad
beagle
firewall
backround
backm
ahhhh
pjs
umprire
aviator
heavier
elaborately
rainn
grip
shadows
jake
wqall
fuzzier
sticky
maplayer
mos
unmbrella
mop
mow
compuuter
goateed
mot
chainsaw
moo
ants
mom
whte
railroad
aiming
gril
grim
grin
rocky
vertically
vending
adams
samwhich
nosy
perparing
serves
server
facing
audience
platoon
doghnut
nose
bearly
cetnter
served
1232
buidling
sneaker
crunchy
dolo
doll
ooutfit
2771
shair
boi
sleeeve
skinniest
chuck
competley
detroit
goin
enjoys
tatoo
pasture
nowax
joan
matching
homeless
users
deputy
gross
blu7e
gariffe
thongs
audiance
banaana
pperoni
reflectors
fondue
overly
kakis
pioneer
ellie
daker
application
expressing
dall
paddling
domut
doggy
decent
knife
lighest
measuring
raincoar
wihtout
crouton
raincoat
poleumpir
dali
overthunk
trianglular
baileys
pastha
broken
piper
drums
diagnostics
drawn
laptopfront
strangled
baileya
feeds
raptor
racoon
reflectio
372
highchair
bol
stations
othe
smear
cushoin
tabel
flannel
meaning
mixer
touchong
practical
midnight
r1
airline
pockets
west
mixed
bananna
headrests
tablu
pivoted
road
othr
whitey
lands
smiled
sateboarding
whites
whiter
spreading
whitew
cercle
airlines
secibd
pipet
osmond
harness
whiten
strip
whiteb
skillet
springs
whitee
sbirt
pastures
wrinkle
clorful
telescoping
shells
downed
distracted
brownale
brute
elephyant
appears
kidwith
lions
drak
railcars
waater
stipred
spicy
pizzza
laint
enough
gory
yupp
buggy
tripod
topright
shroud
wiping
gord
unblurry
photobomer
wahtever
selphie
gorl
ulsen
spice
wuth
etblue
prototype
arranged
loung
pitting
lcock
pacman
liding
cranberries
billowed
siutcase
tiny
kleenex
arranges
peeking
netting
suitcase
blackbird
traincar
rallest
canter
hanged
departures
nstove
gumbo
videos
rapids
deer
deep
fellow
trenchcoat
shorst
fila
woiman
amtrack
grasped
file
baling
girlfriend
shopping
hound
cables
areopastale
proped
processed
again
sfsu
pensive
bickinie
10oclock
binocular
pedals
hybrid
zelda
tablets
tempest
3500p
skieer
astronaut
personon
torquoise
enlarged
letteuce
outfield
lapel
bmi
7801
stripted
obsessed
wallowing
shelter
girnd
puker
vada
orangey
brandy
important
recent
tackle
decorated
curbing
sneeze
awkwardly
sequent
tshir
brocholi
flyig
berries
remote
photos
buffalo
manderin
disance
buke
vechical
husks
u
singnal
lightbulb
resembles
elepant
husky
chocolage
perwson
starting
catpink
growling
drapped
forget
vile
cascadia
mozzerella
suburban
dollar
worms
rachindg
cosest
talky
.....
clot5hing
trainers
vechicle
leflt
fixtures
infornt
protectors
children
unobstructed
emily
shattered
preserves
preserver
multicoloured
z
tomotoes
former
captivity
issued
crimson
enjoying
hideous
bevy
puffs
turnips
stiped
premium
distorting
sittinf
sitting
innerwear
eyyy
fantastic
puffy
shepp
personnel
ichiro
scout
stipes
gy
fall
trails
doubletucker
816aad
ramen
gow
stipped
bulleye
lumier
jumpinig
pre
forking
washing
cinnbon
mothers
drugged
windowpane
worded
nnoying
antlers
taling
form
peripheral
clearing
splitted
earbuds
tribal
bakground
pterodactyl
wman
mb
titled
portable
latptop
grabs
botttle
straighten
knitted
burger
zero
knifed
hyrdant
lawyer
takko
furthes
further
cshirt
zera
ribbon
creatures
ave
otrich
dial
abc
stood
barrier
abg
skeptic
diag
wrecked
stool
peroni
trinket
gj
tobackpacks
univer
dcow
perons
grandpa
smuly
pizzzzza
mum
wrecker
plush
rideing
tattoos
videogame
astride
leashes
carseat
brickoven
bnanana
marquee
component
machintosh
surfer
parasal
ggg
cylindrical
operating
free
profiled
gazes
firafe
bowtiw
standard
zester
ooooooobama
fatter
search
bible
tortoise
division
babannana
cock
bongo
stretching
jackie
storefront
remining
sofar
ketchiup
airport
masterpiece
lasagna
sofat
trianble
giarrafe
1109
smushed
milks
splashes
lke
fron
240
buses
roadster
bllue
clapping
africa
lwft
emptied
hunching
manfar
polor
furlest
ritings
animnal
armed
dachshund
golf
4ound
attired
wanted
eye
burguandy
maron
levine
rafe
wiped
destination
texting
two
enthusiatically
eys
splash
paterson
wipey
raft
megaphone
wiper
creamier
phone
diamond
caboose
amainl
canon
dashing
trukc
rockeron
mill
controlling
lemons
cluttered
licker
asiana
nineteen
town
brom
none
include
fore
hour
cluster
ree
eoth
der
sucks
deu
whitlarge
ladyb
guards
remain
del
dem
clergy
grasses
eatable
tided
dewalt
specialized
marble
def
64foster
potatoe
shark
hamburger
doublesided
bunch3
final
hoding
sunbeams
doxie
loosing
rise
numbers
potatos
sharp
thirng
incluling
pinks
afto
dents
!
filter
needs
liying
setback
dorway
cse
receptacle
rye
airplaine
guyin
preening
ivy
drainer
quesadilla
btter
sut
africian
rihht
blurryness
stir
freckly
freesbie
shiba
bke
lakes
bkg
frilly
torani
petite
choopped
suppose
tiulted
soda
different
frills
ging
blacket
ocolck
sudience
number3
ncklace
npope
abulence
hourse
response
number8
jackter
reaer
chute
humped
crowded
coat
toiletries
doctor
eats
bathed
dragon
upholstered
coal
doused
maan
towrads
sect
muscel
turnpike
pleasure
ry5
bluejean
partway
reflectionof
7286130
infant
unnattractive
rounded
ahlf
earing
coir
winged
straop
donnets
blockhead
againstwall
bottom_l
rounder
industrial
through
cabana
unsliced
tantrums
purpel
suffer
feuit
golfing
24
25
26
27
20
21
22
shortstop
dhands
pcs
pyrex
28
29
handheld
unisex
centermost
pci
thng
holdintg
caouch
baaa
pesto
jumppinh
q
refereeing
dolls
throwup
goof
closset
good
biddy
seeking
males
impossible
noticing
firl
primary
moustach
walls
oke
maruthi
goop
wally
facepainting
okk
ligtest
stepped
gooy
wsfw
offscreen
easily
huddle
waldette
pregnant
pregnany
girlwas
griptape
2y
porta
2d
asparagus
someone
goofy
haydock
cuting
buttom
reft
2n
tinnest
leveled
tiha
democracynow
harm
clams
another
hari
nunchuck
house
fish
comin
monks
banquet
watered
lofa
outstrecthced
extended
connect
fist
portland
friut
randolph
thick
604
heights
flowes
lovers
umbarella
neckstrap
waitng
trooper
01
pigeon
projected
hited
acting
granola
statuim
flowed
print
jacketed
osest
brewery
felted
foreground
younng
foregrounf
crouched
rainboot
squished
seagulls
tallrer
3431
mms
bulls
mmm
foregrount
crouches
croucher
imperial
fadded
ribbo
backed
macbreak
companion
beginning
eumpire
nholding
faucet
coorner
needing
taht
potyion
manplate
ole
edges
dribbles
pure
jigae
corkscrew
wired
601
pilots
ballgame
floewr
cfn
humpped
cupm
donw
giraraffe
perching
netted
motorcade
cupf
jeys
tedy
tedx
surving
done
patrtially
dong
casarole
zh
cups
cupt
shors
alpro
razor
videographer
picket
koo
totally
5th
bay
least
styilist
paint
leash
suitcse
bottomist
mamn
mama
creams
retreiver
mountaintop
holdings
begetables
lease
wigth
pantsed
muscles
elaptop
para
bottlr
wrestling
parm
withbeard
park
procession
draped
leht
part
muscled
inwhich
bunter
doctors
stirt
believe
unreadable
lug
bellbottoms
orangess
tabie
chipmonk
x50
orangest
tof
ollieing
poo
trenchoat
youth
18s
looooooong
gib
polishing
graying
autographing
smalled
roundest
bassinet
outta
zz
urban
pupwindo
unusual
fillets
settles
oracle
zt
womanwalking
smirking
cistern
showers
creased
nexxt
aged
orders
blsack
donutes
blaxk
umberlla
acid
dancine
flared
dancing
squirting
pinkie
laniard
couch
k2
tech
lifts
build
k5
impressive
bx59
puzzed
brusher
zucchini
chary
aring
curtainy
ourtreachedd
coenwr
serena
sweatshirts
serve
chars
pewter
salmon
breadslice
serviced
chari
most
esspresso
poke
caroots
dinasour
moss
zabra
pasliy
sunhat
extremely
chard
refrigerator
suck
kb
chested
constructed
raqcket
ki
poka
becoming
gin
ashamed
horderve
conains
cinnaroll
kp
mammoth
reflections
ku
lv18814
kz
proferring
pease
tomaatoes
dodging
picknic
candleholder
thomas
f9
particularly
emply
backsideways
sparrow
sutffing
fins
scattered
hugging
perches
carne
elicapter
crocheted
outdoor
battle
reddiest
steamed
dak
cacti
fine
find
embraces
choco
everyting
eklephant
giant
nudging
upturned
cranberrie
fluffies
fluffier
zeraffie
rotten
unhappy
bakery
checkerd
backgroun
8
seller
boulder
bebe
touchscreen
racehorse
mein
batten
express
unux
toddlers
woodgrain
parasail
courage
batter
rest
sorrounded
reclining
silk
sill
merchandise
medler
hearbeat
blllloooooo
motorcycles
bet
spikey
crabmeat
closst
griddle
doubled
giuraffe
headsarf
writtern
spiked
common
secondfrom
watever
motorcycke
bothing
refilled
closse
orca
5154
number46
bindi
scruffy
vino
fruthest
tariler
opposing
vine
lowper
tended
scenes
controllr
controlls
lion
individual
manly
ornage
tender
quiche
sheep4
birhgt
bground
gload
halved
visiting
rapist
burner
cotains
halves
fans
smallest
rx60
flame
cutout
rese
nront
ikr
seeded
kidnapper
allother
rover
pisser
pisses
interfaces
pepst
sheepe
jane
sheepy
hill
aircraft
fishign
tilts
ike
tackled
gunshot
dipped
sheeps
eminem
drawings
sheept
pissed
ssu394
chatsworth
cubes
folding
reverse
restaurant
shakeboarder
archway
sshirt
alon
foreign
polkadotted
ypolait
cubed
suede
alot
focused
bustand
mean
afar
baltimore
cakes
elaborating
cakew
point
ib92a
bai
rad
cutlets
newborn
pamphlet
antelope
cakeb
simply
caked
sissor
poink
watcha
throughout
expensive
backend
liguid
furthers
helms
weaving
raise
foregroud
pocketbook
coverlet
create
panera
foregroun
outoor
screened
ricks
secret
dropping
rexin
ireland
peppers
pile
")
broccolii
meeting
4
kathy
vans
ram
pincess
gay
assorted
doorway
honorary
mundo
gas
gap
gam
gal
vane
astrological
yllw
redclick
gaa
shone
j96
epillow
bile
carring
fur
interlocking
grains
raw
solid
capsicum
bill
grainy
dounghnut
crutch
tiered
skiff
sittinng
fense
fun
pompoms
ful
mboy
vanhool
proplooking
constipated
adjusts
banaas
century
cents
brocli
headleft
calvin
decoration
rihght
itself
cloeest
suitoran
gerophy
screws
alomost
mcdonell
leaving
awawy
kernal
cente
ckhlair
parkijng
1537
hahahahha
righthand
furit
2orange
leafed
butcher
puig
teedy
bristle
ews
645
attempt
eww
caenter
day
torte
windmill
strips
wdd964
tupperware
pantssma
keys
stripy
awaycop
leopard
dufflebag
desks
husbands
moment
freig
keyn
toga
keyb
giurl
sandals
panys
flagg
sumo
beanie
licenseplate
sportingbet
cocoloco
flaga
halve
bplayer
county
lmaoo
morror
cheesier
swiss
entry
blip
higherman
mon
grabage
dounught
eyeglasses
grif
slowly
cornet
-
vacuum
graing
isolated
imagel
pitza
shape
grandson
atomic
deckeer
srella
talk
camoflague
predominantly
k337
florret
jumpsuit
letting
kickiing
cut
rgt
dslr
cup
trstack
fromfence
danger
cuz
snag
kinect
shouting
maxi
cub
clydesdales
leftyi
cuo
stwm
clockish
easter
excited
unloading
elepehant
bin
bio
shoved
seasame
bik
frilled
bif
big
bid
traps
squashing
bic
bia
redbear
clam
quarest
chettah
potus
bit
styrafoam
bir
saluter
vehilcle
knock
goard
blemish
healmate
semi
rides
mint
disks
bbok
lclosest
glove
widgets
sunglsses
appls
indication
truco
neatest
bamboo
sequin
redf
mirroe
google
gardening
motor
lastest
humorous
bacl
duck
bacj
vehichle
mirrot
mirrow
darking
kilt
mirror
falafel
candle
lightning
derrrick
cocacola
bacy
scalf
scale
jewelry
vegitarian
visiable
pet
decision
pew
pep
per
tides
pen
phne
connecting
scalp
lard
ped
fisting
soryr
peg
saab
thighs
308
catlittle
cameraman
picturesheet
patient
strapped
300
chessie
303
mcbean
fed
mcbeal
erected
oen
lounger
cild
costumed
crone
sarkedt
bookback
hippie
beane
inter
beautyrest
piles
hisrt
duckface
juive
delish
oatmeal
nearr
bseman
piled
eatong
beans
blomde
redy
mandarin
mimicking
daisies
beany
oriels
framej
fuit
cetner
donought
invading
framed
folsom
exercises
frog
picther
frames
tddy
lesson
frof
stnder
gramma
layiing
preident
ices
straighton
jockey
puring
few
multilayer
hfingers
shareing
tigger
usu
pumpkinwest
hoodie
assasin
pared
handbook
perxon
dalas
forward
celphone
bored
naan
opponent
cony
redfront
rable
getti
pimpin
webcam
parralell
amulance
adjusting
rightcomputer
slacks
liensed
boys
tooop
newpaper
boyw
boyt
shutusdownbefore
boyz
boyy
calico
attemtping
directed
shirtwestern
z50
murica
legacy
lshoulder
cabniet
hafl
casablanca
alephant
eighteen
biggin
spinich
clips
twisler
bubbling
planes
jumbo
551
alternate
weraing
2legs
hawaian
sort
poring
suitcaswe
leaqd
singlr
inisde
expedition
stripped
skat
shiert
mopeds
masts
waitres
images
single
cure
curb
jerse
freddys
hillary
obtuse
curl
cafe
verticle
stagecoach
lettle
stripper
freeway
elley
%
biblical
mixc
scrape
stoicly
tuskless
orderly
kirt
plugged
bannisters
treate
ellen
dimmer
streched
mayonnaise
skateborder
kire
brushing
beow
whcih
jacketwomain
papi
beatiful
ibike
pape
sttpolight
pineapple
ketle
antiquities
stipe
prepared
lens
convention
blye
lookiing
utterly
sakeboarding
hanson
depicting
missile
desert
snowcoved
lotta
theonly
practing
urple
mirrror
overlooking
cooker
zags
colegue
vehicles
ferryboat
amused
2002
doughtnut
2000
2006
2007
2004
2005
yokohama
2008
fussy
suiticase
valves
zoet
doggi
dge
homeplate
1790
skiman
gaytime
piecies
penis
motorcyc
eggshaped
dimpled
aw
nmber
intricate
westwood
golfer
leftiest
frisbeee
1908
omwna
clementines
peanut
suave
rudder
saxaphone
backline
chaps
blaze
striping
frisbees
atlas
officials
maryland
brigada
bottomed
ingredient
spaceship
donue
vlk
swanage
porton
9pm7
dessert
2rd
griaffes
grid
keyborde
putting
anywhere
oiclock
surgeon
mitted
chsir
upguy
leting
entire
measurig
wearin
anothe
scapple
napking
otehr
mustachioed
mottled
rearing
chandelier
busier
teddie
siiting
spicket
coloru
grampa
semitrailer
lettace
crner
redd
ovens
woodne
botle
landyard
fgiraffe
bluebag
snowglobe
wyhite
vvase
donunut
fench
kome
boudet
frisee
crackdrs
ruled
wearig
croc
depression
celebrates
3x
speckle
graffie
giving
whoch
pipes
eatingj
batetr
lepoard
paddle
cicle
access
seconds
troupe
3h
3o
coior
wimmin
snowboader
yszh
cssual
piped
yllow
3d
body
448
faciing
othera
raccoons
ofsandwidch
442
inpink
cameraphone
hittiing
arond
130408
checkedshirt
packing
objects
-----
clolor
others
sing
safet
pushong
extreme
cel
bibles
39
partyhat
jaywalking
stalks
noses
33
32
31
30
37
36
35
34
nnizhigu
frot
confection
graden
bolld
copes
burrote
abite
named
wonan
maroonish
limp
ladygub
private
manny
names
oval
ovan
lima
staple
lime
tanding
sleevesskating
links
eylashes
hatless
mid
attracting
readable
goldwatch
cho
laying
chr
debbie
motorcycel
butler
brakley
themselves
inthe
broocolli
mpicture
phallus
krumpet
sheers
charcoal
spearing
ecole
controlelr
newly
kiosk
wildly
girfafee
thatch
trail
clsosest
mtorcycle
escape
arranging
6only
billed
iin
unbraded
swooping
catage
f
tunnel
9424
bottbananas
package
neclace
dakr
pedaled
blonkde
unopen
obvious
grated
bendng
island
beihind
closing
triain
fetch
something
onlookers
capitalas
fringe
116
tab
snacks
hawthorne
nivea
sanding
bestiality
abck
luggag
luggae
newsboy
eside
bones
sunglasses
mixes
sizers
serial
hangar
lamb
bradenton
sunglassses
lama
visivle
lame
secondone
boxing
ppizza
carrott
lamp
winners
forest
feta
meenie
aft
canfield
nips
asiian
afr
stock
profile
buildings
railings
y
monica
language
kaki
benas
fringy
hight
collection
fluid
united
piace
seashells
slive
pacificcoastal
cuddling
drape
chasing
poached
poneytail
949
sexxy
hind
hefty
945
lines
liner
patially
gesturing
linen
chief
sebra
fac
minivan
ubmrella
lined
unmade
bins
asphalt
babana
summery
hugger
tennies
symbole
gireff
pinkteddy
kr3w
meter
surgs
symbols
papperoni
hugged
lending
leptop
battter
austrian
unknown
kneeing
nasty
galaxy
bunch
showcasing
lg
lbus
le
cocanut
burning
la
twirly
ll
zuchini
winning
age
lt
sffing
lbue
lp
leland
4790
<
tsp
dad
tickled
dag
leggins
dab
dan
spell
muddle
toshiba
dat
harnesse
dav
cutting
antiena
dar
instead
reaaly
macau
toppy
straddling
stunts
taylors
airports
nutting
seaguls
hisself
speared
backgrount
expalin
sin
berrys
siver
shrt
gurl
batch
personf
griffin
emo
flair
beween
scrollwork
hhat
dixie
shier
personbetween
marlen
shadowier
displaying
dour
lft
powerbass
dholding
eathing
womtan
salesman
slipped
popping
hippopotamus
brusied
rex
rey
riesling
mats
lakeside
posteriors
res
rep
wholly
110
lecturn
freesbee
oriental
barley
stud
courner
reb
avbove
electronics
whited
ref
windsurfing
eatng
emp
proctor
rotor
harold
nudels
frank
coek
charir
straigt
duffle
fthe
desh
salami
approaches
facess
que
colests
coew
early
retrieves
retriever
760
polkda
indent
stiring
rearward
mortar
recipes
skateboard
yarn
419
bathin
wagger
chicken
vehicile
binging
steampunk
barriers
hollister
rguez
bsck
troeg
stuck
south
serivce
vertcal
third
girafee
farr
sack
reacher
faucets
papaer
ckae
lagging
reached
clcock
whitre
shattle
leftus
facin
pokes
chomping
ancient
roward
nikes
smartphones
stanind
couoch
laps
blowdryer
chased
frontside
motorcy
motorycle
oclocok
withthe
sadle
mondays
kri
pella
fuzzface
nut
cabin
embracing
zevra
flanel
zookeeper
gear
stripeshirt
bulldog
completed
nobody
rx58
hald
pizz
excursion
foamy
ogi
oge
boobie
ogf
baldie
pizzaing
ipad
lightening
babys
glassses
blmue
slack
colorded
heh
tufting
shampoo
jocky
redbull
patterend
babye
writitng
lover
duddee
india
excelairways
waterboarding
nuzzling
frizbe
sripes
curvey
airforce
shhep
tomoatos
nui
lawnchair
comfortable
patting
sanwiched
braut
bottm
sriped
have
throat
camear
wearingcamo
corral
apparently
biege
sidecar
mii
wwii
mik
huging
stream
min
jerseys
mic
umbrarella
sstriped
claire
parks
inblue
322
mix
builtin
performers
324
miniskirt
ditting
mis
329
parka
mit
cosby
playe9
unless
headded
furtherst
furmiture
crawling
handbar
giffae
tgiraffe
horsie
eight
strikes
handbag
striker
dinut
herman
police
dorsal
inwards
douce
beets
quilted
alaskan
enthusiastic
atus
atwood
graphs
workspace
infielder
occasion
skinny
policman
botttom
planks
--------
dought
umreblla
feline
elevator
kite
traveller
settee
text
walkway
tablebeneath
hamlet
rotating
eldery
kitt
byplant
ongetta
kity
tumb
thicker
crabcake
staff
bedhind
sparky
coloring
grabbed
blkack
blowin
sparks
blowie
mug
controls
ornanges
controll
grabber
prancing
hankerchief
emitting
giraffi
handsome
borcolli
elft
inferior
photographs
collander
haltertop
starch
beat
photography
striper
stripes
bear
beas
beam
bean
thumps
occupant
rihgt
gulch
beae
striped
powerder
areas
littlest
fontest
coazie
organ
ashtray
horizontally
fixes
subways
kilts
calling
ottomon
image_url
marchiori
mercedes
including
fixed
gibson
looks
bicuclist
farthest
turkeys
racked
national
farright
shortere
accord
windoiw
outfielder
shelfs
mortorcycle
hipster
roughage
disposal
checks
racket
multicolour
scisors
showdowy
mkf
racker
awaits
gotten
multicolor
interview
foregrounded
elephnt
turks
strawberry
pattern
aparal
segment
purses
inbetwee
icecream
achair
hammock
featuring
roundish
semitransparent
pursee
pursed
boundary
umbrellow
thumbnail
kruller
brune
rigtht
cauliflower
superior
50on
facepalm
rx55
toting
termite
habanero
2pc
no
nudges
blakc
boss
mazda
fapping
commenting
barrette
ffrom
trump
joke
taking
dazquez
boulders
metered
watcing
insidious
tovar
affection
longhaired
futher
cocopuffs
beak
vanin
onitor
glorious
wear
aa
croaching
statues
appale
ohm
elegant
ships
denim
butons
teasing
pedastal
glassess
laugh
glassesw
bespectacled
edgle
walnut
flowering
granddaughter
butthole
pouring
umbrelal
bruches
iger
exposure
swimmer
muddy
udder
bumblebee
raffe
eshirt
netbook
mcskiierson
easiest
certain
sideboards
nnot
littte
bottooom
uniqn
moutain
ythe
juggles
angled
accomidate
perplexed
inspecting
stationed
brar
elephjant
4m5z
caddy
nc
crockerys
bulk
redhead
finished
ile
sausages
gonj
axle
glasses7
bulb
an
locomotives
bule
brococli
andwich
letture
babiest
seclusion
splits
plain
braclett
brat
appearance
rfront
rectangular
stalin
multy
plait
plais
obsrtucted
burred
scatter
apprears
handwriting
hoagie
ill
lh248
withnose
redbus
reams
cread
helper
kernel
murphy
squid
readin
helped
ay
closets
haunches
arabia
partner
arabic
smores
hoggie
morocycle
crosse4d
begining
readlly
lergest
grinder
micrwave
)
oink
administration
humping
attatched
skiny
frond
closesest
bluury
tumbler
auto
shuttle
whirt
strawberries
rred
frnds
blooms
jakcet
nighttables
frong
toil
faetom
bisected
zorro
receptical
receiver
towls
upclose
camino
bullying
ion
numebr
sarte
hampster
fucked
yoga
shitting
numbered
retard
thrmos
center
sweets
chool
weinder
teeshirt
noodlesdish
bluest
thought
thorn
026
oops
girraffee
sets
hazard
starboard
pitcure
tweezers
031010
broccholi
latest
seatd
seate
handon
coaster
stooge
scrubbing
executive
numbering
seati
bluepeople
tooothbrush
front
ghirardelli
stored
rj14sa774
seats
fone
protecting
catapillar
griffiti
seaty
luggage
muti
dudeds
hamburg
tattoed
spear
pm7
field
gmc
gma
peperonni
benck
lake
gme
bench
adf
pews
add
lapztop
redtshirt
fusia
citizen
281
sirfboard
grow
frsibee
endamame
clearish
smart
raven
herre
eraser
dryed
articles
fyi
fyl
cliose
nelephant
touchinig
throwng
dryer
sandwitches
cntr
deployment
skinnier
handcuffed
rollerblading
accompaniment
insert
heep
flamingo
likd
like
heet
vibrant
stethescope
woiden
workd
perason
laghing
n2nd
chica
xoccer
journalist
mustach
536
chick
works
soft
suti
heel
italian
anyright
motorcyclists
nfl
backpac
pauling
jan
agape
righthanded
obsured
carroats
alive
hair
wider
wtaer
gymnasium
loggage
hait
stuffs
deli
sppon
bttm
stuffy
blnder
happens
latched
nokia
est
encouraging
shrub
conatiner
brass
hurricane
layin
students
traain
holdingman
assuming
screwed
birdlooking
chains
drnking
trap
bingo
pepper
hose
biggerslice
decanter
slight
caucassian
bathroom
soman
heait
host
recieving
strugglin
heair
midbear
pedaling
pinke
grrl
grrn
artois
gwomans
:-(
samlling
a1
socket
youngman
eases
ribbed
mcandrew
a3
flake
louisville
flaky
aboue
pepperani
tailed
righton
toma
tomb
upward
pizzzza
angles
childrens
jackeet
seasoned
functional
socks
hinged
paisely
chris
guard
whiteshirt
surfoard
female
boroccoli
umbreella
locmotive
fourwheeler
hang
earthenware
anklet
midd
wach
knuckles
processor
ridge
wittnenstein
pictur
brides
buckle
pegion
ns
saudi
glasddes
pictue
bees
racehorses
biggest
entered
smig
rca
behiind
buy
xperia
chatting
obscurrerd
bur
bus
coke
bordored
santas
buw
but
wringing
lampshade
shields
repeated
bun
bum
bookshelf
beetween
alaska
bua
blackon
bud
bue
118
misty
hummis
wise
whitish
dangerous
heavyset
j
1182
flip
juli
flim
mushy
sobbing
jerry
shitrs
eatingcarrot
goirl
squat
positioning
cclothes
skating
burberry
supreme
pik
colum
pin
hydraulic
pia
circus
romney
pie
pig
skywards
82
romance
brocclie
our
colur
mysteriously
pit
autism
baot
redder
48
49
46
dressed
44
cashew
42
43
40
41
quesilldas
special
ledge
oap
granite
out
scater
dresser
xxx
loungin
n65940
suefer
nn200
orse
bundle
whinnie
flours
6897
awwwwwww
aroungd
log
booboo
spreadsheet
closestcontainer
bilboard
redman
philips
yelw
stirred
scateboarder
scuba
hiked
aiplane
pance
skiboard
baker
littered
baket
4s
original
hiker
cigarrette
iddle
dooooooofus
yogurts
yelo
objest
4b
blackwhite
8th
pperson
pinkinsh
blure
hats
showpa
hatt
btes
derp
doubledecker
sleep
tpink
betfrel
cinemon
jacketot
bank
hatd
middlest
poorly
trolley
muzzle
manoyse
clasps
gtorade
rightish
paris
pushups
spec
teapot
livig
kakarhu
patched
hidin
bolivana
garaff
342
under
rtmost
rightist
pride
nyp
merchant
@
sportscoat
rachets
pommern
aroun
mozz
lurk
amorphous
hat7
lololol
sanwitch
leggings
jack
african
pendent
confetti
purolator
jace
fireplace
trailer
amidst
siut
school
bulbuos
paused
parrot
comtpuer
cabs
directiy
loest
at5pm
stanting
kingfisher
palmrest
debris
bananana
guiding
humps
suitfcase
womsn
enjoy
umbrelle
parted
bicycle
leaders
feathery
catcgher
awake
razed
almond
feathers
direct
frosted
nail
surrounding
street
standinin
ecc
fronton
4x4
shining
blue
blud
shoter
hide
christ
ruben
exsto
wines
lancashire
revolver
liberty
briefcases
liittle
bluw
ain
mischievous
causes
blus
blur
supplies
bluy
stooges
mints
sideays
pats
kicked
yoplait
n3ext
temple
umpbutt
ramps
roya
floret
kicker
whoite
philipps
represented
path
stares
darkly
mozzarella
growing
etching
digits
nothern
windwo
luggaga
hunting
forum
hideously
mokey
overtaking
leaves
changed
insweat
fullhand
jogging
platforms
falls
chateau
nblue
picure
midway
marbled
chowder
withwhite
cloth4eds
elephentn
figure
visibls
straw
loooking
someing
visibly
blavk
righest
greean
mpiece
meats
bluevehicle
punching
winge
graud
heathrow
meaty
tain
unloved
swings
kying
would
1234567
ztoplight
hospital
spiky
tenders
princess
bkground
rightdog
asses
closerto
chilkd
m3
hanor
ccc
completelt
assessment
los
refection
sandwith
ourth
sammich
phonr
motrocycle
chikus
dressing
wontquit
claerly
refkection
lollypop
grief
towrds
hunny
pinching
cuttin
turqoise
pouch
cuttig
tablecoth
me
mf
ma
precipice
mc
wowza
mm
owoman
mo
mn
mi
onit
mt
mw
buttering
ms
mr
appendage
my
momish
carmel
shook
decorative
inscription
restin
exterior
estate
yellowist
vhair
paparazzi
taxiway
armpt
horizontl
gentlman
yogaposesbelike
elephsnt
jetliner
jumble
times
calve
ceremony
gloden
end
righted
conversation
bunh
bunk
rhite
globular
rhinoceros
buns
drummer
bunt
mccarr
buny
gate
poiinted
charging
sphynx
galileo
poker
8160
description
mouths
oppisit
mess
turing
ltd
haloween
lump
jumping
baggier
sweetnlow
biting
sparkler
salsa
jumpinh
parallel
foork
kissers
nearback
fencepost
rading
sprinked
pzza
spout
playmat
rightbike
candie
harley
loader
bikece
poppyseed
dble
upside
jungle
firaffe
enter
plumbing
diary
hellman
behid
oysters
shadier
chokehold
sprinkes
browish
giaraafe
phose
smller
clapper
sprout
over
bleach
orang
underside
laqrgest
adut
floater
london
oven
wbig
oakland
strangle
icemaker
junior
hared
btown
beside
4389
specimen
unzipped
samller
furhest
opaque
thrust
cla
writing
destroyed
tramp
405
complex
strand
lagage
croquet
platefirs
rz
frunk
pantleg
408
tourist
storybook
shreded
gg1545
clocktower
roost
sorrry
avoids
dalmation
spill
shirtrd
manicure
glassgr
listerine
bundtcake
pinkish
rental
electrics
capuccino
stinking
gluttony
alex
den
corduroy
swaying
edge
shadowy
accompanying
cowbay
lotion
platew
talllest
filling
pane
holdin
victory
curliest
piezza
yatch
blurried
55020
is5429
perimeter
signing
hanger
tumbleweed
sosa
cloths
mahogany
catcger
crowching
paisly
waffle
celebrating
practising
juggling
magnets
riight
poncho
mulched
clothe
bale
gol
goo
gon
kkid
driving
slize
god
motel
washed
sidefacing
bucking
horseman
salvation
laid
fivers
moter
camenra
soocks
got
candlein
washes
swell
gor
aldult
splashed
pinstripe
giriff
slivered
carcass
benind
bottommost
stella
tg
fred
sinning
inof
dougnut
formation
rain
bookshlef
viser
tootbrush
hand
susing
fret
barricade
chasirs
lcake
racquetball
bannana
longsleeved
chiar
puzza
sandwhiches
outfits
lefdt
creek
judging
heck
bije
20th
squinting
someting
bannans
onth
onto
already
omlete
gazelle
scalpel
coding
behide
torquise
hearing
mility
catless
inpicking
descritption
smetimes
scissors
haor
loaded
standng
enie
mercury
geans
tkaing
toy
homebase
their
guinness
opeach
top
licorice
tow
tot
hiting
leporad
carret
merica
ton
too
unglazed
tom
rockin
pinwheel
rainjacket
whiteer
toe
curtains
ceiling
murder
graiffe
landlocked
sheepbetween
centered
tool
brushes
leaking
pondering
ankle
western
toop
wardrobe
jeap
artistic
brushed
sanwith
lather
largeset
prego
standingon
perfectly
erickson
hopping
warmup
hitachi
overfilled
appetizer
3q5434
rolex
nastiest
flwoers
silicon
classes
boarfd
nervous
tassles
peacocks
sp107
filleting
10th
stickes
horsein
moddle
cornsr
horozontal
bridge
donkey
fashion
afton
handkerchief
whitle
ran
pass
drip
leaft
rat
rar
leafs
hotdog
rotors
leafy
guitr
spade
ray
triangle
riden
nipples
mynameis
unvisible
cermony
filming
clenched
holging
balder
snow
kssing
chaqir
raetom
client
derek
sandwih
hatch
donunt
thk
operate
chafing
yucky
rider
diretto
cookout
feigns
shallow
though
bink
cprner
odwalla
manufactured
amrchair
couting
ahorse
articulated
snowsurfing
pupler
coil
candlestick
coin
tibetan
parting
glow
ansandwich
crazing
peers
withtrunk
lifesaver
treats
rogers
biggestone
soups
lift
flop
flow
100clock
raihnbow
miffor
jalapenos
highes
jersy
yang
ornges
dipshit
hasa
enterprise
screensaver
parakeet
musican
flog
thingies
mirrir
bair
desktops
overpriced
gifafee
cutiing
zuccini
labels
sage
sleeeved
bruschetta
pops
colors
ever
radio
rigyht
deniro
mustche
earth
analogue
chewed
kale
stoop
ock
shellfish
lista
aloof
refreshment
newlywed
lambie
540
vegitable
digs
excitedly
lodge
deflatriots
womanly
phototaker
geez
talles
mixture
bottomleft
alcazar
7h31
uhhh
gogs
photograph
silvpink
geet
geek
windblown
repositioned
sunglassed
geen
wedding
taqil
sicking
toolbox
pouting
undressed
forefground
appetizers
n4658w
beads
snd
pajon
viewsonic
rowing
wmoen
dips
beever
licking
public
manbus
twice
yerrow
shots
stripeed
brocooli
brick
scotline
thanks
tatto
feasts
keypad
awayon
motherboard
liquor
hotsog
eleven
winfow
nun
809
num
parot
piza
camoflage
disturbing
noodles
nub
gladiator
hourglass
cartoonish
germain
slotted
michelin
refrgiterator
unpainted
warriors
wupper
leftfront
sceond
grandmother
mud
tsllest
finger
pinkand
waveing
muh
360
liqid
rosery
herding
drivin
redblue
rims
snazzy
toothbrust
metal
brocc
toothbrush
southeast
fugly
eli
aquarium
consists
crosed
news
squaes
mule
holds
faced
protect
uniced
stairing
unicef
ranger
rightglass
fault
yamaha
beacon
smling
corked
participating
players
mutli
layered
games
gamer
playert
faces
threads
jello
lenses
luandon
exhibit
viedo
flippin
smudged
tvscreen
inbetween
cartson
paperdoll
towels
surfed
majestic
pkins
noot
northstar
hitler
nake
bikiin
sunglases
beed
clip
beef
giraffewith
ropes
beek
zigzags
shout
been
blower
beep
fowl
beer
spread
beet
unserved
jokulsarlon
cheking
curried
464674
containers
board
cloclk
brwn
sprite
bouie
orangeedge
foreframe
chipped
leps
teapoy
craft
rowers
catch
affixes
striaght
closedon
glider
stitches
buzzcut
openings
shateboard
yellin
offsreen
recyliner
905
cracker
4522
kentucky
n
lesser
pict
dashboard
stopping
cracked
motorycyle
polythene
gench
rowed
garad
basset
garaf
pyramid
zebera
handrail
dumplings
wallking
broth
goodie
accessories
swk697f
seining
texido
leftkid
flipper
portico
800
containing
giratte
hdtv
softops
alien
nike
headles
transporting
pinkness
emptying
forehead
capt
tensely
ketsup
306
boater
spiin
ricotta
dad4
forefeet
several
birch
pouer
leftist
basketballs
papaya
twiddling
beara
sings
banannas
milky
bastard
badckground
legen
tanish
baritto
characters
unsugared
teeep
sprinkles
rogain
beardman
cycle
arab
tassel
narrow
pointin
inglehoffer
charlie
dadf
dada
boxes
ocean
pilgrim
eleephant
jackte
mother
hearts
jean
brimmed
smokinng
dads
shadowed
leaguer
assembling
dontqui
restaruant
goffer
laptop
pegs
bruise
sprinklez
rodent
pujols
grader
lapton
thumbs
kblack
laptob
bullocks
laptpop
corgi
nlack
krista
cupholders
ell
furry
balances
parsely
elf
5p
ele
5l
collard
sprinkled
shiryt
pciture
anythign
writingg
pitiful
apart
transit
brocholli
lepht
peroson
casting
8141
bands
breaks
smartly
vulture
donat
outmost
saurekrat
characture
cuuuute
cultural
judge
59
roach
burns
burnt
purple7
advanced
pokka
oclor
melting
foots
intertwined
58
gift
55
54
57
hunt
51
50
53
52
specific
ocloc
slimest
laddy
hunk
flaps
diffuser
hung
plaer
valence
ennis
willows
metere
56
petting
mash
shaddow
proudly
emails
zoom
chests
malaysia
donald
centra
scrabble
meterr
cdude
middleumbrella
xbox
redvelvet
graze
elehant
fullington
bikewoma
cooper
enineering
crowns
reffer
exhausts
ear
centre
singleft
ice
rhino
cholote
fodo
eatables
guardrail
skylight
cna
421
nunchuk
mirrior
christmas
cheker
officer
cord
core
khaki
icy
damask
carosal
garnishes
corn
530
bugout
cork
cort
dirrections
umberall
lamps
zippered
engaged
dalmatian
chekeckeered
eatten
plug
procor
playroom
silve
cowboy
cowbow
plum
taddy
cauli
patern
rained
plunging
distinct
rigght
plus
marrron
acer
plup
dognut
turnning
curry
watwr
keenland
carotte
diwn
dials
halfcircle
toothpicks
civic
civil
ahh
belephant
obscene
fern
ghat
acad
bats
aht
ferv
sofaset
stringing
abel
cafeteria
cubicle
rounds
sandaled
doubleducker
giu
folders
gir
bakcground
comparing
teech
domesticated
twp
sunlight
class
mullinix
virgin
striding
twq
towing
tshirte
flatter
tellest
naught
jams
gil
ballcap
ladyyyy
latice
medium
steers
refridgator
strippes
cellphone
spirit
battttttttttterrrrrrrrr
dudchacter
suis
wireless
heat
uncle
heap
tacky
removed
oclok
never
knobby
pantlegs
dugut
reisling
cylinders
motorcyel
684r6
muster
stretchy
bids
rays
porky
camaro
wideest
decorate
nerdy
precious
spectater
sitteing
latch
lookingdown
eachother
embroidery
trim
pettburg
trio
trin
horts
forearm
showin
closestg
lugguges
506606
rahm
everest
shiney
hamd
whitegrey
towwards
safeway
shines
annoying
heater
trip
propia
nh
flowry
leanin
outstretched
redorange
sandwech
na
panam
tiw
tip
ne
tir
tis
wher
tim
tin
luscious
tih
pizzajust
papers
np
tie
juming
orchid
nt
nw
evergreen
picture
sink
gujy
awaiting
tasteful
pankcakes
football
332010
squ
skatborder
left1
holstein
rectangulaar
adverting
swater
ridges
lefttop
toat
proceeding
reighn
nody
yehhow
bigges
planre
pedophilia
younger
radishes
faster
bullet
navel
stacke
yacht
landed
htdog
uncovered
moustached
bambi
jacquard
bulled
serious
backward
stacks
neighbors
funkky
coach
rom
ron
drained
smeg
rob
laamb
rod
caqr
leered
rox
roy
parker
graphing
tank3
rop
girlcjat
guava
rot
rou
row
zookeep
3259
protest
spindly
everything
penal
1940
netball
turbin
tees
environment
flowered
puting
thebook
melon
lapels
scrawny
burners
waxed
brwown
shoesand
reching
icouch
animla
sunglassing
horsae
fleece
bedsheetflorabottom
sloppy
tanks
fodd
hatted
cyan
mellon
little
cool
mullens
sleepier
clouds
leven
catman
wheeese
crossback
hawain
chardonnay
peeps
hawaii
cloudy
fornt
carrier
slouching
ppointing
qindow
lever
babnanas
purplr
metor
genleman
gor251
parked
whoes
pork
drier
says
sadwich
porn
rectangles
h15
inland
theright
colin
steppin
dried
comforting
soldiers
pls
pedo
bake
cahir
bakc
whoel
drinks
boats
couvh
stands
plae
unripe
labcoat
underbite
524
525
526
527
allyguy
tatooed
522
nistraining
identically
hairy
1235
kama
hsi
morgan
persone
nge
styriped
hairs
learn
ouch
gass
kickball
water
lu
filmed
baseball
michi
groups
hoarse
hairc
haird
strucuture
transfer
stuffedanimal
unidentified
coffeetable
stomache
sheriff
boast
washer
healthy
pearls
hadn
guilty
brelly
biigest
sabdwich
wholding
cinnamon
juiceleft
shirtto
weird
entrees
sakting
rafael
lowers
lowerr
blooming
shelled
neverwhere
soybeans
tuxedo
bearf
threes
sleeveess
prple
potpourri
parellel
durham
rash
1st
prompt
frispe
selve
porshe
ballett
sledgehammer
banans
leanging
dickinson
handled
pickachu
brighter
renfe
mst
rasing
celand
sports
simase
msn
handles
handler
contianer
iphone
frothy
memory
healmeat
australian
giraphe
prep
today
unpatterned
smeared
gotee
standign
e44507
kerry
zebbra
conductor
bareely
clicking
flying
swearing
cashier
breaded
moniotr
casey
fuel
oragies
beers
at11pm
cases
scaf
personn
contortionist
uturn
wanda
behidnd
edible
lolol
asimov
toyoda
brocollli
straightened
swaures
visiblle
judy
elastic
gguy
playrr
meatball
gazelles
pickle
newspapers
rowp
streak
dodge
meeter
partialbike
earphone
nursing
irlg
mayonaise
multiwheeled
smilingly
cheerios
unform
onstems
tinted
zebar
surround
wiimote
throwpillow
carriding
photobomber
counting
photojournalist
heaad
jetblue
resturaunt
maned
gerffe
pedobear
robinson
secured
brand
dinner
yeleow
1
indentations
refridgerator
cardinal
suitacase
newscasters
toate
righjt
hannema
carafe
michigan
films
anime
tipper
setter
pandolifini
coruching
protection
information
cynan
machete
choach
cholerstol
losest
perosn
crashed
levi
4th
tipped
mixin
oversees
floral
xxxx
yeallow
inorange
wagging
coveredin
florak
classroom
branches
awkward
liquid
121
plugs
drumsticks
shwing
wookies
awww
rollin
needy
branched
glancing
cannon
april
hilltop
shinning
surfbord
metter
words
food
blocker
spigot
mom7
innglasses
guiness
nee
motions
dreadlocked
giraf
girag
toucing
pontail
blocked
foldable
86
leggg
foward
maps
cuttee
cutted
leggo
joysticks
hanky
platform
parmesean
farmer
aprilia
swans
prisoners
happened
lonely
2ndd
saecond
remover
moms
cresant
sandwixh
bound
underneath
chuckie
untensil
tulip
jeansand
refrigerated
cst
viel
rifht
feathered
brownp
withgray
wagon
chemtrails
wily
covring
name
hawaiin
corners
aceramic
carrotato
ooking
ensemble
saltshaker
weaing
lght
differing
hashbrowns
dabs
talest
talble
265775
capped
rethinking
busty
gras
jaggedtop
pillaged
blacked
experiment
tirangle
torch
sprinkle
blakberries
gapp
zebre
catching
haul
zebra
apothecary
betweeen
girafees
grraffe
zebro
hinding
sunrise
splashy
xmallest
reasearch
hacket
wraper
girafffe
tulips
statio
middleman
factory
treading
ruck
waggon
tagstanding
stell
grecian
seocnd
opkins
she
cloves
clover
chupacabra
suftboard
hula
closrst
booby
hull
boobs
teddybears
hulk
withoutmask
unfriendly
flyer
boobk
vacaction
orangina
tranquilize
upon
grab
manikin
compression
peddalers
breaklights
affected
childen
n7975k
sry
trucki
yur
boywithhandsfolded
microvave
motion
yuh
yuk
watermealon
place
truckk
integra
swing
turf
plack
turd
1003
creepily
teammates
blood
pelican
somewone
sarong
closers
closerr
clumped
number1
carrottd
zerbra
unfocused
soaring
giy
pedestrain
backyard
alike
bobcat
carrotts
lags
pokemon
george
pbear
iam
given
ian
molded
otgers
gif
whitw
bloom
whitr
designer
plastic
yellowest
cooling
metrocyles
looing
bikewear
bounty
firsbee
greenblue
plastiv
circa
bday
buttoned
frontrow
holden
hug
spiral
hub
cope
teshirt
season
holded
grund
huh
paritally
alan
alap
thebred
conversing
alas
sainsbury
canine
hus
whilst
traley
exttreme
grunt
holder
huy
wide
nathan
lmao
yayyyy
bikers
gather
shirtclosest
92
return
r
1cock
boquet
cards
winbe
nypd
noes
ney
driveway
frotn
questionable
seant
twisting
mated
ana
froth
anc
plaintain
pro
head
prk
snaggle
ant
tarte
lumpiest
cupholder
ghot
sells
braccoli
moutains
any
ferring
superman
certer
kimchi
silhouette
sanswitch
datsun
bottomboat
ideas
clored
dining
phillipp
animation
benie
windowseat
fracture
triangel
earting
gmail
umire
minotor
surf
surg
hooves
biff
multiple
equestrian
womon
bggest
overcooked
ih
clearer
dcreen
boiling
donation
lugguge
fce
net
frig
kbus
frie
cleared
forage
icon
latex
donky
toprow
seafood
later
slung
hungry
playing
beaded
tllest
covred
pisa
beiing
pored
senior
cuddled
plyaing
sculpted
quantity
slope
perch
urge
spaced
leftside
rottweiler
it728
cheap
poatato
represenatitvedean
spacer
ner
keft
ruffled
mister
truc
woolen
woot
bracketed
nectarine
tabula
eagerly
connector
tagalong
gull
state
woof
wood
whitetouching
biskets
wool
cammo
boyle
centrally
lighted
lazyboy
correctly
dekker
rhe
jazz
begging
rightehind
sss
clbaby
colrfull
dree
lighter
mashmellow
portions
bikle
brit
lkeft
coslaw
freaking
closure
heinlein
aluminum
sleveless
sinlk
leeft
potatoesrson
naked
yams
embassy
bison
jummping
firrst
tent
discussing
barrettes
bouday
goldish
obfuscated
ignored
strope
picnic
1098225
ken
leter
innards
jiraff
bidr
advanceing
shapest
yellower
rmf
barelly
parking
personwith
heavy
mailton
turbine
surfaces
snowskate
madison
headseat
crystal
ways
jeter
review
amen
tractoe
skaterboarder
redbook
outside
watering
ef03
futherest
xys348
porcelian
brid
wottgemsteom
clotheline
istra
unbitten
comp
sungalsses
coverings
brunettte
guitar
peering
fiddling
diners
guitat
dungy
pens
withglasses
come
bide
foreplace
strawburries
mt118
katie
saurkraut
whatevers
vista
region
23
quiet
trailers
byself
llady
phallic
berry
bangle
senator
railway
wiyh
bunks
joe
nno
catwoman
hayes
pnik
thhat
brightly
bricks
pow
pot
robotics
hunched
pos
pop
sampling
pon
meeee
pole
montor
64
65
pola
67
polo
69
poll
polk
chidren
winnie
secondchild
turkey
late
rgiht
uppper
poufy
howard
fromit
turker
cigars
turket
grenades
fury
thirdfrom
shiking
hobo
slidder
509
helicopter
cords
hardly
abstract
501
630
1210
brasierre
eatern
titties
piences
blessing
hgolding
slingbag
6p
at3
eatery
minister
bismark
penn
careful
pilow
dribble
maccaroni
pilot
paying
wristed
myself
fiends
predominately
middled
efo3tvv
onesie
spiderman
donot
mount
stickered
sex
nothingness
cask
cast
dorky
slippery
prka
aplate
dorks
relection
shadpws
moe
eggshell
slippers
numbr
vest
mixi
fishsticks
toothy
candies
broadside
maile
chopstick
couples
numba
vese
clutter
comuter
bluetoilet
ironic
gibsons
candied
ldy
helmet
peices
sippin
participant
projector
author
alphabet
fender
emty
locking
bown
chuckling
middliest
elphant
bows
macaroni
acatch
bowy
fusion
buyy
derby
personb
cizano
persona
barefoot
bigggg
tipsy
weel
headlite
frombottom
yo
drives
laptp
weed
driven
lapto
petticoat
tweed
conductors
personw
statue
footprint
partail
drived
cartoon
uc
cooke
staking
shenzhen
derpakeet
oants
hoddy
caressing
ranch
sufboard
wiggly
yhe
sreen
without
flakes
eggsalad
components
gump
goos
model
styrefoam
folcus
koala
kockey
cloe
lb
tobogan
clob
cloc
when
guided
laptpp
motobike
ninth
clok
tucker
oxford
8138
cutlet
kill
inblack
harrison
clos
polish
satin
kneeling
kneelind
scarfed
ehite
nx
tonys
womanw
couter
widest
letf
risers
rose
personleft
seems
except
blog
cammyz
lets
tio
hing
blob
samples
whitecouch
womanl
womanm
flashing
sucked
righht
checkeres
kingdom
mystery
beautfil
conventional
carpeting
compter
shearer
\\
sause
fridge
middlediet
touchpad
bluriest
squating
unsmiley
siccer
bathtime
sasquatch
pleasequit
color
furniture
valentine
acute
depot
towel
designation
kennedy
hiss
tomoato
nissan
purdue
towed
shelf
oddly
yelloww
keycaps
footballs
lloking
tower
tic
attempting
272
ye
orate
gingerly
collapsible
leftgraffe
turck
ridged
ponytsil
elepahn
striaight
spheres
tannish
checkereds
byitself
perspiration
depressed
labeling
horiz
confronts
canteen
intact
electrolux
lentils
developmental
niot
sittn
sitti
phoenix
micro
bento
shirtless
longboard
faintly
slick
stops
moon
whitehorse
nutty
moos
teardrop
buddha
bendingb
rubberband
googles
porter
2a
bluefurther
letteing
eiffel
cyclest
giraffffe
txting
poem
lmfao
itching
nails
cringing
redsirt
royals
scallots
ladys
tuperwear
found
crt
yf
belive
flown
croton
_
motorbike
oo
on
om
ol
fillings
oj
fixings
oh
jeep
of
oe
od
oc
ob
shrimp
undetached
scrapper
nexst
scornful
ox
ow
cambria
ou
discusses
os
or
op
amber
mumu
ladies
kayboard
manre
patianna
nearst
instruments
secondmost
garb
grteen
tribu
nextblue
rising
conjoined
puddle
gary
burton
journlists
v8
gars
mental
buds
therm
ehr
popovers
whales
nescafe
there
frazzy
racist
backpackf
yoghurt
valley
hare
kia
752
cobblestone
hard
relic
jug
754
coted
sandle
ounces
amongst
cabinet
jus
rosebush
eliz
longer
cakre
mothafucka
applying
cornerzebra
zeeb
anchovies
guidebook
bbq
zeep
spinache
chapped
grass
creeping
chaplin
toilet
lyggage
9151
despense
tanjacket
sacrtf
taste
bottler
twobrown
bowlitself
grafittied
boyu
cockeyed
dirction
tasty
pushing
cbz
diversity
bicycie
oragen
blues
florewerrs
incorrect
beds
hart
abaove
verizon
bicycling
gomez
backpacks
burden
mositor
orient
ouring
roses
stumbler
etched
hellfire
trash
virginia
decration
rigthest
ny
byleg
sprinkels
thrusting
winking
hwk
motorcylce
uncorked
symbol
vechicles
midair
dof
includes
pratly
flower
bounded
poodle
unbent
included
srtiped
stocks
umbire
finals
brocley
semicircle
jovial
n3
lugguage
sidetable
calls
wife
transporte
curve
rumpled
tumblers
curvy
cussion
directors
derrick
rimmed
drank
apparel
beingheld
fromman
tanned
lumber
uropian
crumpled
blackwoman
lace
chinese
jcaket
reflectioin
wreath
fiveing
hosre
kicks
surgical
disc
rammekin
leftestest
parmesan
dish
lacy
grren
lck
hmmm
synthetic
blacke
mooning
apartment
vazz
lining
highwaters
inother
2ndglass
interlaces
aaron
program
squeeze
craked
barely
grilled
facepalming
bouble
crest
tethered
decorared
wive
belonging
liter
ok
egyptian
far
tnak
grinds
soled
fat
focus
arwhite
colorwed
worst
greets
blackl
awful
sony
salmonella
humvee
ticker
fae
leads
etnig
basting
jaguar
haorse
towers
list
grandfather
trench
grad
undone
saxophone
highway
booting
lao2ntk
lisa
neckless
boutenniere
unripened
eatn
teh
cockatoo
jscket
ratt
ten
hitta
nbr
jonitly
reins
tee
haat
breakers
triforce
khakies
unbrell
unidentifiable
design
jockry
6382
pixie
saucers
hairspray
tes
leady
anf
cheeses
riderless
sub
shiwing
oyster
sun
gund
cheesey
crust
brief
sandwhichs
crush
suv
womn
sandwhichi
scrapbook
onnocupied
wome
fruitloop
focua
racing
guns
multitude
umbers
fartherest
toes
ruffle
noraml
seeping
oteher
zona
sprayed
squatting
pendant
topper
toed
compressed
pengiun
directions
feilding
takingoff
blader
raket
shoulda
blacck
pintoy
pea
nd
naval
meater
tabulr
siamese
blondish
navac
hovers
alchoholic
cucumbers
flask
califlower
gangsta
milkshake
gleeful
bidette
ayellow
dontquit
meroon
elongated
batmitton
sticking
paired
620
members
partal
scowling
binders
demin
coagt
yellolwish
saids
screens
mabe
armoire
grossness
contemplating
appliances
tableclothe
smal
zeebr
munchies
jerkin
ddue
plade
bleow
donuts
psmall
charge
donutt
piggyback
tought
shity
inlay
lightpost
demo
humn
garnish
d2911
inlap
minor
donute
horses
flat
israel
clocking
horsew
knows
scrcouch
definition
compromising
pintucks
horsey
flast
nieves
flax
nibbleling
powdrerd
flag
dos
stethoscope
horsef
talkie
mellow
flan
pontytail
glad
girarafe
fzk
hic
crustiest
fuethest
xleeve
slutwhore
glip
policemen
requem
cicular
umbreal
rquiem
shirtman
wrestler
v
marc
henderson
diaplay
tpples
hihest
renato
tshit
computers
embarrassing
salted
brown
pont
monarchs
pilote
sunny
transvestite
tagged
byke
protects
urinals
sonic
closeat
pone
elephnat
airplane
rearene
vegatable
tankred
nightie
blew
blueberries
keybrod
court
aglass
khakis
rather
smcs
breaking
cellar
blackpot
cathcher
jellly
lam
brittish
gizmo
speeding
geko
ignore
explains
goat
auborn
tinfoil
sandwicj
tide
sandwich
okay
exhaust
headrest
vinyard
610
exes
1274
elphent
reflect
umpirer
catalog
lighting
huged
numb
softball
twiggy
glint
skyfall
concentrating
snowflakes
rotund
short
womnan
bjfg
whiat
susan
ani
shady
eggmcmuffin
dasani
departure
stash
footed
shore
borccoli
essert
shade
caut
nuzzled
maneuver
shado
facingus
turnover
buddhist
helment
gauges
copper
laboratory
argyle
artwork
doorknob
reversing
proverbial
disabled
interviwed
handrails
thomson
littler
deepest
airing
member
boul
eew
vulgata
9832
blass
catchers
tootbrish
lipped
wheely
inbtween
mattress
resort
strange
boneless
version
bouy
stephen
oar
bout
soccer
might
wingspan
elige
parfait
brwon
69621
somebody
sucking
racoons
aggressively
hoping
middest
abarely
hunter
predator
clippers
framework
witting
gigos
5030
oone
porcelin
prpulish
liscense
chicago
bigger
instructions
products
bacground
adjacent
level
zardetto
jir
barell
bolts
coest
buschel
snowboarders
firehigdrent
refrigetator
athletics
hammering
philippines
armrests
neater
ideapad
tilted
annother
weight
elph
n3706s
posts
ajacent
littest
him
suprised
modernized
loopy
perspective
talliest
troon
loops
bath
inrange
braided
brucelee
vegis
alcohol
ganti
gur
canco
plaids
eclair
blackedt
loll
reverend
krispy
bkac
stopper
lolz
aligned
sk8r
caucasian
towagon
sandzebra
knelling
behnd
fiber
wisconsin
workfast
chines
combed
friday
barey
bucnh
hepburn
tractors
leves
experimenting
cookie
tiedye
tassels
fuller
attendant
couceh
sidewalk
cookin
bushes
unique
acura
bloodied
thread
chaisng
sylvester
ladyyy
hardback
sidewall
bagtag
competely
atcher
circuit
twenty
snowboarding
babyface
fallen
stickin
bushel
frome
frillies
grifere
froma
dino
radical
feen
urinal
fancy
vegs
fromt
sailor
heinz
gey
whiyte
blank
writting
slower
7oclocck
dilled
purplechair
baggle
toasted
idea
n177
story
"
temperature
script
gourmet
leading
briefcase
everyday
comfy
hangs
stork
swarm
manwith
pizzja
cale
6044
closeyoungest
ctcher
teabags
photographing
store
headache
poultry
hankercheif
watcher
reeaching
cush
lettece
patches
hotel
scooby
60
montier
blondie
camrea
because
merlot
rifle
mandecorating
cruler
bathrub
uncut
reflection
kinf
king
kind
compartment
yum
n468w
pme
remot
double
instruction
fuzziest
kinh
clawing
skatebord
dignitary
stall
cuff
susuki
outdoors
dispenser
foreleg
ratnn
poisitioned
cleaner
uniforms
reish
anokak
jsut
bumble
k214
teddi
62
takeoff
motocrcycle
bookworm
booklets
butgundy
gala
squinty
cleaned
gall
redheaded
hexagonal
oriole
fivehead
wilson
nights
sideawlk
check
bales
efs
eft
freshener
cropped
port
moist
entirety
adys
cinammon
sandwiches
bppk
tyedye
banjo
pziza
oraange
jurkin
seedless
foreman
added
electric
test
dresseed
architectu
acorns
gilf
aman
reach
carrybag
architects
77
cigarette
75
74
73
72
toongue
70
nothing
seasons
pouncing
79
appear
patterned
trolly
vetable
mineral
windows
doggie
palystation
pictcher
sharpe
peddaler
traditional
pruse
goel
saloon
notch
lying
stones
stff
cdf
loveseat
copy
decorates
fong
uniforn
faeton
caucasion
qeii
clostest
coutch
grumping
brody
stawlker
fonz
obstructed
carrie
font
ponytal
stubble
tarmac
camara
testicles
securing
sharing
heavily
cmoputer
grazes
grazer
ladle
sleepuing
starving
tacking
vneck
520
hdden
srry
521
hip
shepherd
hir
his
hit
goes
beardo
footboard
p6382
beardy
peguin
b
hid
longest
audobon
britsh
worktable
beards
eploded
toliet9
hin
stamp
refidgerator
cheersing
knewwling
stroll
chuks
spinch
necked
clostes
shooter
cartoons
propellor
laptap
heaping
wheeling
engraved
nibbled
wrote
barq
lifiting
bars
bigbear
stump
dump
forequarters
sholders
plumpest
tarps
uses
arches
pvc
defense
bare
are
arf
matic
squarish
pinked
bark
ark
higest
leftest
barn
recording
lidded
decrated
frme
headers
forlorn
user
nutella
blurr
ups
drooping
leftwindow
unions
creme
various
sheeet
mpdc
emirates
numerous
blurb
watchin
blackskirt
glases
awayfrom
peeled
recently
creating
singled
toilets
muffing
weared
sold
sole
sweatsheart
porceline
sneakiest
sotting
paking
york
laughign
rayys
bibs
tater
tacoma
raisens
shared
c
blazer
license
crow
pete
headbutter
bandit
uglier
blazed
pharmacist
motorcycl
witch
sparklers
bond
rollers
sititng
redcoat
camig
sloth
flies
toilety
sweet
dudew
snowshoeing
dudes
barefooted
flattest
peron
trck
weasel
whell
prominat
lilting
slots
tgn
[
asdf
swi
panks
gypsum
java
dum
celing
kihaki
scented
mosst
dud
emblems
frieght
strategy
pb
pc
pa
pf
nother
shritto
meeny
pj
pk
ph
pi
pn
bavarian
woke
pm
topmoat
siting
referee
flight
gjuy
brother
buck
paljon
gort
opeaned
beanbag
referer
giaraffe
stiching
rocking
instructor
hyrant
drinki8ng
hholding
plants
hhead
phante
georgia
aboe
guarding
frozen
footballer
floatie
cha8ir
mythologies
ainimal
adolescent
froggy
homework
abov
dugout
kred
moustache
vegies
tuft
racerback
identical
antiqurries
strapless
mosse
walton
0049
rit
demon
vegitables
verticall
shamrock
rollerskating
rim
nightstand
rih
windbreaker
rig
rid
exiting
rib
ric
sai
railcar
numberone
brownest
shirt
lisence
flamed
shiry
bannnass
chairback
bagback
tothe
propping
backcatcher
baconl
wierd
kimono
shire
backseat
widely
peoples
9
itchy
sanwhiches
spears
kimona
daughters
higher
liquide
ambul
hyena
morotcycle
elaephant3
cabernet
couce
cement
protesters
cardigan
moving
cradled
ziplock
nyellow
tente
lblack
bittom
built
rightgirl
banda
noodle
lokking
brockoli
spurs
atcha
cheek
chickens
anybody
hotdow
struggles
leaps
260
machinery
oneway
riffle
sittng
cheez
awayt
hotdod
stating
vasewith
jessey
gorgeously
samoan
unseen
motherfucking
etruck
pigeons
starbord
ignoring
oral
questions
tredi
lowr
lexus
northern
becnh
network
gems
tables
loading
tablet
majority
tbale
dnut
workers
smallist
bick
closesnt
contractor
remainingside
clsoe
galoshes
caesar
herpes
lefleft
quick
lfet
westen
acrobatics
porridge
chaparral
garraffe
dowdy
sittig
bills
vendor
topings
rustier
dvds
sittin
wasit
manatee
candt
cirly
empy
inspects
seperate
cribbing
shaped
seemingly
raqket
restroom
botoom
miami
rightman
earings
garrots
pithc
guacamole
sprinklers
centerbear
gde
eggy
roght
gasing
fucking
sauced
blacktshirt
hollies
littel
gumdrop
jump7
global
litter
gleass
candy
9856
illumination
fridhe
taping
shirtperson
sauces
saucer
pained
roti
vol
smallish
sunbathing
5ocolock
fairing
theboy
lowerumbrella
leftmose
pros
medo
js
pjnk
boke
prom
unpire
ticking
lappu
leftmost
lappy
brookfield
rier
privates
jumpy
bubba
tryck
flute
scirt
withut
bulbs
bartender
jumps
martin
perpendicular
zombie
aloft
andn
hnadled
volley
mct
raider
cartons
intense
cibie
bootle
muscat
pipeline
tble
colck
standalone
cheered
plaza
wineglass
sblack
surfers
guywoamn
147
foood
sausuage
towl
ylo
paralel
womens
wanna
herritage
bikeseat
cutoff
ringmaster
andf
remotes
frootloops
stroplight
stitched
procter
mommy
johns
footies
mustached
144
insdie
momma
frontest
selecta
holster
browine
bowtie
motors
iwth
ellipse
couches
barfer
canam
sideview
rows
whittest
jameson
midddddddle
bliue
question
bigh
long
baggy
brun
peeler
neives
mendo
cupbatter
martni
helded
3iip
sections
rown
files
mountains
plunge
canotier
filet
skewers
raisins
soccar
sticked
persojn
searching
parsons
cloth
sammiches
crank
lugga
bluurry
delta
upright
aisan
crane
kitchenware
showcase
raising
penguin
n370
hush
swamp
tererrium
asain
consist
114
apricot
caller
fries
peppermint
par
broclli
homo
cartwheel
glasswes
bumbs
highlight
greeen
strandt
strands
called
sunnies
pets
bell
ef03tvv
c350
freak
tiniest
stick
dismay
minutes
cleveland
leaqning
burritto
merry
seco9nd
warning
ether
00ish
fatso
chiild
rji4
rally
bbus
indoors
ottomans
rainy
grr
riot
peach
dontquitr
hanes
onc3
backt
clum
laughing
backs
saffron
gry
behindanother
nick
parlor
gre
moca
yoke
gra
grn
grl
duplicate
nice
terlet
mustard
gloss
wrinkly
booger
rhcsa
cannister
breasts
medina
here4u
helping
donkeys
insect
wakeboarding
chirt
posters
je
clue
dunder
coved
pottery
sourkrout
tong
happier
eatime
vice
meek
pomegranates
snadwich
microsoft
impatient
cleanwat5er
umberella
nasa
bluej
oppisite
scayborad
largely
international
screem
dragonflies
carved
scroll
once
mardi
pervert
windo
edg
gireiff
pigtail
bannannas
edn
steve
spring
furhter
ugh
uner
gang
adjustin
twerking
carrrying
issues
shorthaired
simon
donit
roofed
fenced
fut
lower
corrner
squeezing
stable
unobscured
habbitat
cip
fences
prella
persepctive
rag
sleevless
kermit
breathing
cakke
drvers
batta
chiltern
barstool
cay
chappal
spool
spoon
bowler
hotdodg
fourthest
skaters
drinking
andrews
bannnas
flatbed
posture
burwell
hillside
girkl
balsemita
harbor
swatting
descend
notes
caraffe
skiiniest
fanny
foch
sleave
skids
rasberry
facemask
pollini
jerk
modena
pleas
smalles
smaller
gripping
smallet
batwings
folds
benchs
lightest
combination
benchh
fold
usher
xebra
benchl
traveling
hummingbird
watiching
ummm
trcuk
pinapples
derpy
folk
obey
autographed
straek
cameara
checkers
blobs
looping
kris
togther
helmets
hardest
airstream
waiting
lette
barly
maggio
attire
ourple
aircrafts
demolition
toenails
journal
bowled
straighest
stearing
oard
ocklock
delighted
cozy
degree
wrapp
kangaroo
bench3
tralor
middleview
fishermans
usaf
youngest
desired
brpccoli
sot
swirled
glaceing
ferry
sexy
camouflauged
harl
sportcoat
solingen
cyclist
railinng
jeweled
metro
and1
larges
larger
shades
larget
h2
rhombus
engine
headless
weddig
rattan
armpit
redchecked
shaded
pajama
initials
reds
mock
shovel
tenese
sheild
vegeatble
redt
duct
app
laynard
invisble
wgreen
sockjs
bwtween
hardy
performer
adida
caughting
rede
cheerleader
stanky
pring
bindings
apa
hairtie
ape
biscuits
use
usd
from
usb
usa
olcock
crusted
whindsheld
pinning
rackets
shirtlifted
matted
chir
fathest
ust
refuge
weeping
furhtest
gery
fez
kewuit
automobile
possession
betweent
clever
rabbid
porch
detail
musician
sory
antennae
accordian
meant
parrots
bedskirt
rabbit
antennas
vehcile
handicaped
montior
topic
wtih
courch
rheingold
panted
emperor
refigerator
getting
beaqr
stroke
savannah
undecorated
napkins
stabilizer
perched
freedom
aand
posing
dropped
tat
moctorcycle
blizzard
girraf
tap
patron
tas
cheesin
selephant
pad
tax
villian
tad
projecter
faceplant
hilton
carror
wwith
tac
tal
ofpurple
tan
beague
onions
rape
counterfeit
sis
sir
msutache
sip
andble
perfomring
sit
lotus
six
aeroplain
cheif
kc
backho
starwberries
swear
sig
sie
sid
charriot
gurk
longhair
toddler
panic
cuffed
camoflauge
typewriter
beeef
puppets
doubleheader
inflated
beeen
femail
onbottom
tacs
them
brocolini
halfs
shealy
beigh
abuse
wrist
asile
men
taco
volleying
footpath
creame
filght
facign
standinf
rutledge
strapy
chubbier
moterbike
2125
sculptures
light
straps
sidcolored
packets
lighr
budge
strapi
697f
honestly
medsals
sailboat
lighe
acatcher
martini
ottom
breast
rusted
blroccoli
stamped
looka
couichh
quesidilla
immage
compass
renissance
133
shearers
glassws
vegges
misshapen
kbs
suiting
cgair
betweena
badges
contaminated
write
gunslinger
orangy
strectching
inbgray
lage
bys
coveres
orangr
lect
ruspidge
ccloser
tyler
ellephant
choose
turban
what
orange
covered
bye
edging
belted
partally
magnet
eastward
chamo
crash
fourth
pecans
blackberries
citrus
flour
ragged
material
barbeque
oranges
tutu
uaimh
bertie
spikes
snoopy
emerald
loner
flee
legover
mushrooms
wrigley
traf
footstool
redwoman
bgnd
tram
doorless
overshirt
fuze
aceton
trak
corndog
trimmed
countertops
fuzz
fiddle
hawaai
ketchuop
leftelephant
cursive
flavored
tray
ballons
birdcatcher
florets
florette
suace
rightele
lilac
atable
weaved
cenyer
registration
handerchief
bogey
girlll
straightest
88
89
dishess
fried
sectional
ous
83
80
81
usdot
shearing
burkha
sleevs
moth
vaseblue
cocktail
frontier
chaor
skits
herded
navigating
lifering
waterloo
holdig
frothing
grits
herder
sectionon
supports
clone
hut
controlier
angular
dictionary
starfish
pours
utensil
ipod
camoflaged
molly
handlegrip
shirtlesss
utensit
chaircloser
tenniss
dumpster
shirtlesst
8p
disgusted
additional
repairing
ltr
navy
organic
cair
g
jousting
snowplow
broccli
mouthwash
horizontol
birthday
toung
vac
cain
toasters
laugher
timbers
bulky
*
plainly
bouquet
afgan
pizzawith
umbrellaa
redskirt
vihicle
bonnet
185
horbur
bonner
hardcourts
yeloyw
umbrellas
umbrellar
backpackb
vaz
righ
salient
champion
olderman
theman
edtge
backgroundish
controlle
accent
fugure
mixie
rtght
potty
siad
zion
sedon
bundling
wthout
furriest
rigt
photoshopped
redwhit
ght
shell
bycicles
slided
shallot
academy
reversed
luggggage
buries
dreadlocks
slides
groomer
patties
reflecting
bhind
greenlight
nlj182
bhing
videogames
basebally
july
policeman
stovein
classiccar
throghing
contoller
twhite
colar
boiard
behinds
boring
swept
cathderal
congratulating
tommy
carousol
nemesis
nearside
moto
backhand
candles
indistinct
sculpture
behinde
behindd
bottole
kure
blie
clevage
ofpic
189
fown
dessed
teenagers
berets
mogul
bomberos
delineated
pealed
faux
youmger
goodies
intersecting
20s
ringed
fleft
chevrolet
jke
afraid
angle
sittign
scone
skittles
oozing
flowwer
visiible
bagel
sunbed
reaper
jeands
baise
which
96010
bling
asshole
teeniest
=
vegetation
infranord
patchy
pointier
ctall
sol
pretzels
shiniest
petrol
9oclokc
screenprint
frontman
stcker
whi
ocming
wht
snacking
tolit
cautious
bandanna
wering
279
wihite
toitlet
why
clasp
blurrier
baout
statute
polyester
barista
tvnect
skying
neighboring
fountain
neutral
outfit
dent
pipe
powerbuss
veyr
hi
cloaked
redshorts
biggger
banamex
fied
macaroon
weeny
pinic
firstamong
hancd
balding
bulging
bellied
stove
bratwurst
swizzle
guest
cheezit
photobombing
purely
bonzi
seaweed
chickeb
99b
dorothy
tarin
amimal
tured
seal
pleased
cualiflower
neares
nearer
highest
mugs
phoning
wipers
clutching
trojans
togetherand
orangle
basinette
eat
surroundings
stationwagen
behindest
sunflowers
lemme
leaningn
combo
dreamliner
piano
controlers
local
labaled
babyist
spun
cube
workin
sagittarius
watching
mainly
fronting
fressbee
oneo
windshiled
payphone
ones
stadning
cubs
backdropped
holdign
chips
burned
sweat
mlaptop
champagne
stitching
wating
2encond
married
toiletback
ducklings
sweatrhit
compliment
cleavage
tagger
sparrows
seconwlman
trrain
view
fram
windswept
pedesterian
freinds
tpx
skirt7
kyoto
piecs
airborn
039
sndwhich
trainon
buzzed
violet
xuv
bicycles
bluetooth
etchings
035
closer
closes
cole
cetipede
dle
buoys
meatballs
junky
xray
dms
identification
panty
closed
copilot
crude
banna
lloks
umbrel
blard
pants
mizzou
folorful
weighing
cjild
opening
slumped
mieves
beverages
observed
labe
recycliner
job
stropped
futhest
spoil
knoll
addis
fanta
avon
mailbox
swift
faggot
messed
barrett
gloat
thhe
tiers
mortercycle
valve
renault
veryclose
lifeboat
goal
groundf
caera
splotchy
plaidman
wilferd
panst
toweled
aprin
grain
bronw
dedtroying
canopy
jenas
wireles
grounds
bedspreads
dizzzy
reacting
pepsi
blacksheet
shoving
outermost
smilling
niddle
makin
haolding
walk
packaging
claping
reomotes
scribbled
whittish
upmire
table
assless
lrigth
horton
trays
forms
kenobi
manblack
chiken
2ndboat
purpl
intimidating
cowboys
charts
marilyn
reindeer
cry
besid
hindi
bby
motoercycle
hinde
floats
etning
killed
filthy
mike
motorcyles
proudest
playstation
lbowl
quesedilla
leggs
brocalli
sardines
yeild
crappy
hmm
hdog
lass
unpeeled
baniyan
bikkini
panel
nicker
thowing
redleft
present
kerchief
eyelashes
trunck
hooie
corset
richt
griafee
vanilla
boranges
streusel
leggy
will
cupcke
hovering
fingertip
31250
headlock
wild
cutter
marshmellows
omlet
~
supply
layer
layes
motif
tar
nom
staright
intside
downish
tubbier
drips
rooster
boath
bystanders
baldish
blacker
layed
frying
crystals
thug
withbx59
fwrd
steamlined
whore
devicepainting
bayside
fkn
perhaps
vintage
headlight
cross
unite
getx
japanee
getz
knealing
wantin
largest
units
wooman
onleft
gets
gyu
tomatoes
ot
cellphones
elbows
smlling
abd
hasir
earphones
brish
diploma
octagon
beast
coaches
olock
rosy
student
pestle
ridder
tenis
whale
collar
warming
sasuage
cleff
bilbord
celtic
edemame
umberrla
ridgeway
1954
mwoman
frontgoat
antipasto
contest
banded
mejestic
fighting
scissor
gleeping
cries
gutted
spectator
english
1951
ifted
piec
noy
rocker
load
ccolor
bendind
cameo
looked
bulbous
camel
boot
camea
colours
middlebowl
emtpy
facebook
accosting
shower
batteries
fishing
umprie
camer
boyth
moma
happiness
wholehorse
guty
now
console
pendulum
toilett
bating
nicks
gblack
guts
sky
jffc
capabilities
chees
arresting
simple
concourse
other
attractive
tawny
location
jars
ski
chouch
boom
knob
skright
soccerball
ubrellas
myth
escorting
masquerade
flowey
doored
ridden
ein
know
facial
denser
press
doughnut
samml
lsptop
acrylic
incredibly
shephard
suitcoat
loset
bood
classmates
41096
loser
preservers
cornerr
roundly
dancer
chekered
motorscycle
handstogether
agents
umbreall
washbowl
kawasaki
showinf
nigga
drinkware
kdi
nrocolli
sequence
hornse
moterscooter
scared
church
illegally
crnter
onme
115
elks
117
growth
111
passengar
bookbag
112
wodden
empire
meatloaf
neglecting
scares
stoves
darkest
leaf
toppled
lead
miney
leah
hibachi
lean
kensway
chapter
strippe
eldbow
thumbleft
campfire
hoking
ethiopian
bwteen
oliad
earrings
cllosest
patiently
boccoli
leader
pasty
platinum
ripped
omni
conveyer
cansee
dangling
mitt
buttless
checkboard
slut
3carrots
buulseye
shavings
nehind
pasta
167
expo
paste
slug
liscence
tuffs
throne
sitcker
throng
cliffs
incline
extension
saddle
column
haired
biscuit
shipping
persing
carries
tomyou
ashy
taddey
perky
friege
chariot
fivin
farthers
outwear
highfive
owl
nanny
own
polished
tenneis
wilderness
biind
cheateau
creativity
lenght
tailgate
tag
paintjob
headphone
innhold
pajamas
weather
hotline
brush
buick
skiirt
collumns
oww
messener
teabag
furtheest
rowboat
lfar
van
val
bumbo
dyla
munster
apps
limit
groomed
kidding
furtest
manb
thiss
tracksuit
visitor
cakelike
kang
pouty
vas
appe
upwards
ajnd
tunning
beard
lookign
certificate
samll
catsup
intensly
tinged
role
sweatband
8777
jerrys
volume
vivible
hairt
hnb
camere
glassall
igraffe
granny
superwoman
upperbroccoli
lookigs
draculla
televisio
made
tems
temp
whether
douchebag
bck
positioined
nightgown
record
below
persian
garish
cake
headlaying
caka
tissues
stirring
federer
aebra
m101
ploughing
resting
jewel
year
spines
remove
maroon
refelection
---
boogy
boardwalk
sheered
atter
coffed
trotting
trailing
limb
loking
upsidedown
offcenter
boowl
chocolat
guitarist
shoulders
inset
coffeee
waterskiing
curtained
smears
othes
book
bool
es
sick
skatebaording
frypan
boob
wheelers
pickels
clicks
boog
adjustments
pwesons
junk
peporroni
kinds
shredded
setting
june
forgeground
converted
toasty
margaret
jetski
showo
sandwhich
kinda
sandles
toasts
priced
urnal
penut
cliff
letterings
prices
banff
broccollii
bwol
pamplet
stachew
strpe
boo7
mfos
dimwhite
sleeves
fuped
handlebars
sash
apolstery
representative
