# Supplementary material
Source: ML conference proceedings conference paper supplement (https://www.ecva.net/papers/eccv_2020/papers_ECCV/html/123550052_ECCV_2020_paper.php)
Supplement: Supplementary file 4 [file 123550052-supp.zip › code_of_lscm/data/vocabulary_token_referit.txt]

<pad>
<go>
<eos>
<unk>
writings
groiund
foul
griding
four
woods
spiders
hanginf
railing
centimeter
spidery
mountaijn
canes
sunlit
shurt
lord
sinking
oceany
aboove
propane
oceans
yellow
malfunctioned
screaming
wooden
voyeur
satchel
crotch
gorup
sdky
glassy
tired
hanging
scraper
tires
bannister
second
nondrinking
quite
blouse
thunder
cooking
fingers
bonuses
thewalkway
fossil
alllll
dialogo
pressed
crouch
dorr
whiteish
here
herd
china
ater
cult
dork
kids
k
cloudds
glaciars
kide
talbe
climber
spiderpenis
golden
projection
behnd
stairsto
orangish
unit
slivers
dne
swining
backing
music
passport
marchers
until
expiring
jcket
notin
holy
esecond
glass
foregrounds
hole
hold
shelvs
blade
locker
itself
turtoise
melons
ower
organized
pinty
buliding
want
absolute
hof
hoe
parralel
machine
how
hot
cheetah
caone
thebottom
goober
bvottle
skjy
wrong
farrrr
italy
baggage
truned
wing
wind
wine
taableeeee
thebulb
diagonally
rigjt
fit
frst
backpack
bewteen
bulding
hidden
fin
doghouse
kangaro
mtns
xd
slats
silver
headboard
skills
arrow
volcano
weirdos
manlady
snakes
spidey
garment
sideswalk
whie
spider
bowls
cathedral
whit
shhirt
rt
rv
snail
oprah
bottlesrtight
waive
ytellow
rd
re
noice
rb
ri
rk
middke
leraves
augostura
oooh
midpoint
onfar
grapes
checked
thwe
topleft
speedo
ate
whote
birdie
r2
shelves
pilllar
diabetic
takeout
musicians
eatting
chiars
lifejacket
klizard
siddwalk
orance
spinning
kfc
wasn
moutian
veggis
movida
windmills
basketball
service
lego
tango
needed
olde
hiyo
chugging
critter
legs
legt
ront
cushions
ridick
agein
seconf
trek
tree
icebergs
tres
runner
corne
paddles
paddler
shrubs
runned
escalator
concrete
bleachers
metallic
doors
tipi
zebras
unknow
doin
umbvrella
shale
victoria
mouth
letter
retaining
dummy
singer
backgroound
baldy
balnket
professor
camp
camo
screan
pioece
bottomright
paoth
loiterer
touches
busy
clicked
menu
kapenke
buxom
nannas
bust
mens
bush
touched
rich
rice
sied
plate
godzilla
woamsn
foodstuffs
television
foremost
pocket
cirner
cushion
plats
thingys
anythere
abovetrain
greent
greens
onright
boarder
patch
llachon
watrer
greenb
bleu
blew
foreface
waterbottle
howse
pads
clea
skulls
best
suticase
lots
sombrero
shirted
buches
opened
score
irl
lota
arewa
cubby
pirate
lamas
hanfing
ask
lamaa
buiding
ofperson
wtf
wheelbarrow
wth
buslike
midlde
country
rgw
strange
lookin
pre
rightside
cityscape
groupof
parrton
2nf
2ne
2nd
dorm
canyon
diff
blonde
dooor
lighthouse
fro
frm
.
roofed
stadium
sittign
tallest
ulding
dots
baloon
life
worker
substance
toboggan
chile
child
tiniest
worked
cunt
ridiculously
sdiewalk
player
floooor
violin
snazzily
memorial
thingy
taped
things
doofus
split
frooze
wurrd
treesd
marcher
skyyea
tops
topr
topp
tunk
abobe
treess
raiing
fabios
aroudn
mounatin
ornge
plaque
mddle
bellow
greyt
sleepy
tiire
falcon
lllaaaaaamaaaaaaaa
rushing
divide
hah
hal
had
hay
easy
prison
duffel
east
hat
scrotum
bushb
hint
birts
possibly
pgoto
shadow
bushy
deisng
alice
pavement
steps
stepy
left4
bback
right
old
righr
crowd
people
crown
billboard
creep
botton
for
bottom
lockdown
vyer
fox
knoll
fog
umm
foo
bottow
leftt
coller
shaker
leftw
leftr
lefts
dental
trampoline
lefty
lefte
binder
leftg
furtherest
leftb
leftm
terraced
sandboard
lefth
secnd
benches
theleft
o
cowgurl
slightly
meddle
iguanas
barred
raised
kissy
son
magazines
sssssnake
mangos
soy
poss
fabric
farhest
panorama
support
constantly
centerup
call
overhand
overhang
happy
forming
yelloe
leafage
tasmania
anywhwer
otter
mtntop
rippling
inside
dcale
panels
waterund
dues
elow
hollah
proud
cliffside
miidle
hungry
pinguin
bedsheet
splotch
mrs
dealer
triangler
floot
floow
dotted
floor
glacier
ontop
flooe
crowne
bottgrass
roll
greenery
palms
geezer
ntop
coprner
yueah
rolling
nxt
pion
pet
time
push
banners
peacock
:/
:(
couds
chain
bandito
apts
skate
skiing
trashcan
chair
chait
mountaln
machu
ver
crates
vey
veg
bicycles
bicycler
yert
snmall
flatbed
jerk
rightw
redish
knapsack
fullest
exact
minute
avirex
tricycle
leavy
btween
minnie
leave
lefton
............
teal
team
leftof
peoeple
oions
meadow
collage
sigh
shirtl
sign
shirtt
shirts
soccor
snowypatch
bottomish
pidgeon
falling
crashing
badge
beneat
banister
backwords
benead
purmarca
alone
along
passengers
wherever
bowlish
poeplepepleple
hoding
urfboard
ofimage
love
arbove
brigse
fake
blck
forefront
sunbathing
working
wicker
angry
loving
peope
mpountain
peopl
tundra
everywhere
riders
mascot
backgroun
mouuntain
whaaaat
backgroud
whater
vegg
stature
plantpot
esky
seccond
awesome
mailboxes
parachute
corenr
tubers
winter
pousada
poking
elephant
divider
stood
laundry
spot
rmac
speedos
such
suck
filthy
sy
surfing
hahahah
wheelchair
mrailing
placemat
arequipeno
quadrant
underneatht
darkened
sh
truck
sm
pulled
vike
coorne
decals
course
tto
notsky
baclony
shudders
solitary
limbs
disconnect
thumb
accordion
milked
cloudline
gatorade
cetner
limbo
apron
feelin
twilight
\
runners
dide
corener
didn
ceileing
fisherman
jellyfish
veins
cropping
quarter
deade
turtle
square
entering
beetle
troll
canvas
container
onground
blu
ftat
beyind
lowlife
anywehere
seriously
blk
squares
bordering
besided
lwer
badana
uposide
smalle
senter
besides
grandma
bumpy
clould
smalll
clodus
furthenst
silhouetted
backside
dunno
mtgrools
ostrich
ostrict
massive
beatle
ono
landscraping
onm
onb
bluish
ony
submit
rockmiddle
spanish
onr
chubby
potted
open
ont
city
looong
bite
2
stuffed
typing
streetlight
bottmo
structures
lefrt
floppy
shawl
squiggled
brownthing
ridiculous
iceberg
emoty
coats
siding
builiding
glossy
coaty
drywall
scuba
coooooooke
grasssss
san
sam
sal
merchanise
turned
alley
sad
say
sax
heck
flatness
saw
sat
bursh
misclicked
owls
downwards
somethings
note
behicle
take
handshaking
butterfly
handing
opposite
veventura
paeople
tleft
pages
lawn
peice
sde
arche
bicyclist
drive
backdrop
bracnh
salt
archs
backmost
walking
cherry
peaches
bright
lettered
sholder
waaaayyy
slow
byclist
gourd
straigt
3
blindy
going
hockey
uppermost
blinds
ministerio
neath
suitcases
balconies
wheelie
outlet
cig
laguna
clearest
faceing
lanscape
pimp
lboy
tiki
skyline
borrom
silencio
tortilla
where
xmas
goup
wwater
diver
poops
paired
poopy
teacup
pesrson
jumper
inappropriately
checkered
uk
vertical
farts
screen
dome
spare
checkerer
carclose
jets
mountaintops
mans
manu
parapet
wioman
many
ouse
s
mang
manl
seataed
stream
twin
boar
twig
boat
aobove
teddy
stretch
mounting
vacation
mountina
yelllow
reflective
mountins
juts
centerpiece
photos
rooftops
parasail
reebok
shanty
fances
canoes
newspaper
centerpatch
spotlight
penthouse
canoe
brow
purse
blak
bkue
medcart
blac
lgrass
ivy
lamma
highyway
coconuts
lovers
wires
edged
edges
barber
advertisement
teepee
colorblind
montains
flocks
tuft
twits
biggish
shortie
masterball
grumpy
being
beind
whiteh
rest
farthesrt
blondes
blonder
deceiving
litte
undeveloped
bricks
haystack
skies
skier
around
middlish
dark
traffic
world
sovietmobile
dare
sails
clak
pole
shutter
tsunami
clay
grouping
seating
pof
kola
diving
thinks
tube
faaaaaaaaaaace
nook
exit
unsuccessfully
graas
power
brickish
;)
seond
ayayyaya
stone
package
ack
favorite
slender
meal
esaki
pthird
littlewhite
slighty
stony
womanis
marshmallow
image
legged
freaked
treetop
.........
purplish
burglar
her
hey
lounging
italia
series
hel
slopes
bubble
botto
shodaw
bottm
continents
tone
outcrop
pissy
wite
blueish
with
buying
handsome
rockleft
secodn
flirt
rags
beelow
dirty
darket
torso
builidng
rust
darker
peaking
ac
vehicles
ad
fright
af
ai
certain
moutain
am
al
an
as
at
aw
pedestal
frys
cream
2003
tight
someones
puppy
slant
vilia
terra
waving
herbs
midget
pictires
tricky
leftto
penninsula
mask
having
parallelish
mast
mass
nelson
ringworm
cpu
barbria
consider
ceramic
mnt
obscuring
ty
tv
tu
overlying
ts
tp
to
tail
tm
chewing
thorse
th
smile
te
ta
roadway
loungers
ppls
strand
peop
cable
laying
bafs
sanf
dinosaur
sand
sane
hieroglyphs
small
mammal
centery
past
pass
hick
clock
vehickle
section
fucks
burgundy
purpleish
ubilding
nighttable
anywhr
nurse
anhwere
piture
full
hash
bottomfloor
dorks
ignore
palid
cabnets
roadways
pics
sidewlak
perso
persn
pice
towaars
via
adidas
glowy
select
iglesias
stander
frontmost
sitter
fattys
6
more
door
ablue
signpost
fyellow
dood
seciton
reight
coyote
doom
tees
foozeballlllllllllllll
gravel
eisenbahn
gropu
thickest
mall
seagull
male
scramble
beautiful
iceburgs
prsn
sense
buil
dress
tapestry
umbrela
huge
speedboat
glowing
disturbed
bbird
unattended
creature
plant
greenwall
plans
clothers
plane
waves
backyard
plank
snotty
anyleft
volleyball
trellis
eyeline
patio
peppr
mexican
pant
brik
paper
pane
signs
broadway
smiling
its
roots
brid
allt
ruining
sauce
sombrello
severely
tabble
weeds
weedy
sucked
0range
yellowy
nugget
always
yellows
swimsuit
ttop
sk
dimwit
lantern
airconditioner
brunette
sidewlk
bends
topside
lampposst
critters
llight
bluey
personany
blues
bluer
really
anxious
missed
blacks
gr4ound
morebowl
salute
duckies
delinguent
personn
corwds
airway
blue0
bottomest
abovetent
castly
pilsen
derped
retainer
w
bumper
orage
castle
clump
lbottom
aligator
saaaaaaaaaannnnd
number
feeder
slipper
golosinas
ironing
firsts
helecopter
guess
landmass
heads
jet
rectable
moderately
hote
crow
master
railng
immediate
mmmm
onlly
3rds
treein
stairs
spidercumunga
posada
bitter
marriage
mossy
pedestrian
graffiti
blong
blond
ballerina
peerson
odd
self
h20
also
odf
knobs
play
blackboard
plat
unused
ttree
plan
plam
cactii
feilds
vegitation
sometimes
cover
h2o
donkeys
barrel
attacking
ugh
gold
tallests
surrounging
closeest
blender
streetlights
driend
clothesline
puple
cassette
columns
plushie
beams
blowdart
sunny
compass
banner
pphilips
sleeve
paddling
weaved
smll
river
pilliar
beasty
set
biuilding
clos
see
sea
knees
#
guinea
topmost
crossword
pickup
crosswalk
cycist
nope
knowing
monumentright
bheind
hottie
ligth
pereson
snowboarder
last
letf
backgrounnd
paiting
isalnd
retarded
asbove
whole
load
):
doughnuts
bell
forklift
rofl
scallop
carlo
church
bluejeans
belt
roofing
lizards
bloe
hitting
lizardo
toughing
humping
resting
sleeved
squirrel
backgroiund
fire
borwon
wheeler
endtable
racer
awake
firt
wheeled
caged
straight
lieft
duran
leaning
kissing
lade
ducky
arching
moth
ducks
aove
ushuaia
glictcyy
funny
decor
shorter
rules
groudn
smokable
gringos
yeeah
organes
popcorn
uilding
guylady
stack
amy
ladt
amove
picks
person
persom
feces
clasped
turqiose
caledral
using
forrest
pillard
pigalle
pillars
eerr
grapefruit
parents
bottl
surprised
jutting
australia
instument
couple
midle
adaluz
navimag
farthermost
flannel
d
lanfer
parially
individuals
scape
stylish
clipping
goddamn
sighn
sighs
palm
sight
greener
baige
pale
onely
memebers
mummy
buuilding
temple
be
object
reddest
bl
oout
bu
santa
obscured
by
certificate
anything
nosebleed
whiteboard
packpack
scraggly
midlle
garbage
into
inti
servers
ner
inty
span
bcak
zig
exposed
lizrd
suit
:
anywere
inches
jewish
poster
atop
link
line
posted
mountians
uy
sleepers
up
us
ur
um
grove
un
uh
mature
ue
mountiani
njacket
discolored
armstrong
soliders
defined
char
doe
ppicture
furthure
fixing
girrafe
definitely
swirl
tarp
potion
scrub
teeppes
cobblestone
mountaints
sides
furthest
lane
land
fighter
lana
furthesr
pedestrians
tghe
holes
advertisment
satellite
whitepaper
summit
walker
fresh
plantboxes
hello
spectaturs
buildingto
partial
rihgt
splashing
totem
baby
freakin
chillin
tissot
young
prodce
garden
withwhitesquare
llama
kangaroooo
tri
northwestern
magic
folaige
harbor
gettin
tre
pennesula
try
race
hoirzontal
trr
rack
crook
video
enclosed
spaghetti
ues
rodulu
twind
turismo
sweaty
silverish
uhmm
indian
twins
flowing
standers
bird
slabs
birf
scenery
lef
leg
crosslegged
lel
dentis
lacasa
let
darkker
thems
vinegar
great
   
casino
titanic
pattle
greay
staricase
buss
grean
makes
maker
boxy
sirt
tools
standing
aniamal
zip
maneating
illegal
next
botttle
capri
moutainside
pencil
asrch
babe
besdie
gooooooooo
carrying
pppl
placard
balls
animals
this
athlete
pour
jeep
animale
thin
drill
siedwalk
coffin
rectanvle
wedge
hostal
bent
reeds
lock
slim
rode
tiles
pieces
high
tallish
bend
boner
trumpet
stoy
docking
patter
lamppsot
hookin
lunchbox
animal
yellowish
honda
blocks
wallpaper
blackhat
lookinfg
tied
towle
pigs
tier
ties
cabbage
hawk
racks
tomato
sry
counter
curains
2x4
animas
sdie
collred
counted
secon
standin
thign
thigh
move
aniaml
motorcycle
directy
perfect
decal
hobby
literaaly
attachment
designs
leftper
organge
outlined
innermost
middkle
dock
threeleafedplant
freaky
snakd
snake
kiss
niglet
penquin
cage
outlines
sidewalkfront
sniffing
smallpart
beneath
glasses
closte
cristal
doing
flanking
surfboards
books
meth
bigfoot
bunched
'
bag
iwndows
bunches
hilarious
greena
waters
oblong
leaniong
wristwatch
uppy
greedy
berson
shub
uppe
luggages
steering
shortest
scary
could
lountain
bsckground
length
notebook
ylooking
ears
scarf
ext
manuscript
blown
yellw
scene
wataer
jesus
yello
bttom
owner
wbuilding
los
picturte
system
darkgreen
stomach
lot
shorts
gotcha
unoccupied
botom
grandpa
shorth
haven
steel
siderail
buttocks
trike
steet
steep
steer
viewer
leftcan
ceneter
gently
cvorner
clearly
illuminated
documents
dishes
hammer
turquiose
babes
linda
latino
lily
soap
;-)
brazil
oject
lefgt
pyramids
lefgs
gurry
visa
device
manon
segment
peopole
locust
face
highlit
painting
bbuilding
atmosphere
rainbowy
dbl
rings
vienvenidos
assholes
bring
woth
bikes
greenhouse
bedroom
rough
pitched
pause
planter
jaw
jar
should
buttons
planted
tape
jah
riding
hope
meant
handle
sweetie
means
catcuses
fronds
styrofoam
grrrr
h
stuff
centerish
handstand
multicolered
bluefooted
btw
appliance
frame
reddit
packet
slanted
btm
mbottom
textiles
wire
parque
rolled
cloudless
thupper
iguana
ends
pronged
lg
grafiti
butts
courtyard
shrubby
mdidle
shapes
staring
drum
ddark
1649
drug
peeople
etc
doorway
figures
puff
cealing
bottel
bottem
ca
closeset
skylights
cd
cu
gondola
poured
chalkboard
marsh
feather
waste
>
tingy
homosexual
lgo
cayon
laady
puerto
atlanta
coals
runway
grinning
ultra
sith
hamicks
ve
fg
lush
lolol
sherlock
vw
forground
sits
puento
terrorist
highlighter
statuesk
highlighted
apricots
digging
glaring
backgrund
ball
balh
bald
upon
coffe
peir
paving
dust
overalls
bricls
buidlings
off
shacks
overcast
patterns
daw
drawing
bananas
less
footbridge
wtfever
loer
broomstick
luggafe
nacional
lattice
wet
nilas
dest
piec
gopher
five
desk
pier
fools
sidra
onion
criss
chairs
midground
garage
chairl
ballon
whtie
almonds
thier
humming
transport
bienvenidos
hallways
avoid
does
kangaroos
blurry
castrate
stairway
blowing
persin
buildinng
leff
stage
sister
tcactus
facewhu
seeds
blackness
concession
swimming
biker
letters
pussy
erect
roads
waterfal
swimmers
alpaca
anywherre
housing
tents
lowermost
much
leftsky
bagged
overlapping
surena
grate
count
betwwen
smooth
placed
monument
receeding
problem
chils
int
bluilding
rubble
inr
ins
sibling
bloud
lovebirds
peoiple
ink
agains
inf
ing
anywhre
planting
wheelburrow
trrunk
variety
geenery
ponytail
dokey
francisco
marlboro
writting
treelike
badass
betweenall
dolphins
ghost
eof
eon
rule
rigging
lift
gardens
buoy
bushers
saver
crumpled
fountian
mansion
wholly
chili
drinkin
mounrains
bike
stuf
worth
brolly
blanket
nodule
perurail
waay
chapel
curtan
nigger
tocks
treeson
phones
horn
chef
hammick
hors
totems
ramp
7th
fatherst
panda
abovr
everyones
abovt
+
cornre
treeon
tomates
above
toll
wrapping
bikerack
bookcase
watermelons
daughter
items
smal
watermelone
vilalge
smoke
bunker
aka
fitting
whitewater
ppath
spooky
snowcap
bro
brd
bra
plot
estancia
igloo
alligator
sweater
bundles
plox
ploe
suitase
lobbbbsterrr
separated
lable
haha
award
laeft
blocking
boobies
camra
bartender
err
work
worn
era
blooming
elbow
waaaater
midd
raod
airstrip
india
goooo
veggies
conditioner
macys
nuts
inmiddle
boats
beach
nright
pizza
bnottom
lak
lad
ladder
after
lab
olimpic
lay
arch
headdress
las
chillen
......
greet
encompassing
green
greed
pictuhs
office
zee
trres
diagnol
bubbles
middel
somewhere
kleft
vents
carton
then
them
thee
safe
break
band
bang
giraffe
reaches
they
ther
bank
bread
rocky
oxygen
rocku
backgrounds
l
buklding
rocks
dingy
flyers
rockd
lifted
monolith
logs
peper
tyeah
pepel
sccoer
logo
flock
network
gridded
wperson
hooked
academy
forth
sliding
barrier
noteboks
middlere
leftovers
pika
nto
whattt
topo
dammit
created
chopped
poofy
horsmen
blossomed
another
thick
thicl
alcoves
likely
doge
elevator
yelloish
dumbass
flagpole
dogs
twater
fench
emblem
walway
emply
wasted
seated
iron
minus
giraffes
portraits
dildo
sconce
infront
contents
reall
ypu
amnd
hatstand
bunkbed
luxury
circles
colothes
corder
extending
panneling
pantsuit
circled
windwos
grave
foamy
swamp
thewall
lightpole
rocker
rickshaw
structire
shubs
chandelier
dopey
skyh
geyser
nbottom
aldy
skye
skyy
skyz
blading
pegs
skyu
skyt
rectangle
yelloow
do
dj
railings
dc
da
nasty
thiong
winow
runs
covering
woma
emu
wannabe
steak
steal
steam
sutff
depends
cattle
mangoes
helmate
lifejackets
pasted
away
overgrown
biek
coener
drawn
onwe
liht
we
wa
wo
windowglass
wi
wh
gays
kitchen
cop
clostest
cot
cow
ill
underarm
mariachi
fags
ilu
com
bettle
con
tough
spear
layers
royal
mostright
tons
hammcok
wider
bikin
speak
ooooh
has
air
aim
ain
gront
blondish
thrash
mistake
cylinder
sticker
stickes
brake
kneews
elevation
whitessmoke
warthog
foregruond
drawers
descend
mou8ntain
plater
plates
bunny
plateu
wheel
sicking
rail
evil
hand
mountainous
skycrapper
wispy
condiments
mouontain
tains
tht
ths
thr
tho
contact
mamma
centrer
thh
the
musical
tha
backgroung
dside
photo
farthes
thanks
tbottom
hills
stripedy
photographer
hilly
spread
board
openings
burrerfly
raeft
boxed
caps
boxes
barge
cape
sweather
virgins
cooler
sparse
night
doorwa
tcloud
warerfall
backrow
10th
webs
stardust
pancho
bord
cabnet
confusing
purple
/
filming
onplate
ftront
adorable
peek
pls
pose
plz
thge
ple
pla
post
woamn
onthe
selva
wateerfall
trophy
erson
newspapers
horizon
shared
shingles
pineapples
mantle
pineapplez
float
surfborad
capped
left0
greenry
creek
wal
cantalopes
medal
wad
frill
fight
way
wax
wat
was
war
lowest
snimal
snowy
phinics
peninsula
rocknear
true
coset
tinychat
mts
secenery
maximum
crop
different
clounds
mtn
fuckign
mtf
mtg
umpire
cacao
airplane
topish
dack
dace
topped
shrine
holding
aorund
salad
welcome
notepad
begel
bedb
botttom
bedi
horsea
together
beds
horsefish
spideys
yesabove
lineup
stick
switched
dance
silverware
horseback
selection
rectangles
grss
fartherest
bagpack
middl
grape
somthing
midde
flash
thighs
rightmost
tusk
quilts
thingie
brown
kadauchi
mountin
boombox
builldings
fountasin
byeond
entries
backish
margarita
leftbttom
gun
p
guitars
gut
guy
woven
upper
hte
brave
hell
skyyyy
sealrt
rightunder
upped
eafy
cargo
appear
posers
uniform
tarantula
supporting
andina
whiteness
bebeath
teacher
change
buch
parasol
flames
exiting
trian
bangs
triad
horese
pillow
higheer
hiking
extra
marked
snowboard
marker
immediatly
market
obect
streetcar
super
live
waterline
angels
entrance
countertop
towers
envelope
clud
clue
fingered
clumps
graphic
douche
car
cap
trane
cat
brck
can
cam
cac
cab
mountqains
heart
grassy
chir
skyskraper
grasss
chik
nesquik
chin
viventura
grassd
chic
clothing
buildng
ponytaail
lounge
beat
sweatshop
iteam
staircase
wonderful
produce
reef
faceperson
vases
polkadots
vasey
goal
candles
laft
candlee
serving
indeed
ended
birdy
cold
still
birds
cola
rooftop
curly
windom
windon
sexiest
window
windos
windor
tiara
marshall
non
thrid
tails
noy
half
not
halk
now
hall
down
tubba
drop
chaier
backsplash
entirely
cliffs
em
el
yeag
yeaa
clouods
ed
yeah
leeeeef
goose
wrap
fires
tharrr
ey
yeap
yeas
year
th4e
yeay
es
er
showm
sealions
shadowing
space
sitters
looking
stooltop
shows
thong
carr
cars
cart
poeples
upest
grimacing
carb
ominous
lright
carg
card
care
couldn
carboard
domes
british
honest
flaags
coulds
domed
blind
bling
anyine
striking
zag
tippy
mountainside
flipping
tanktop
sorvete
directly
impossible
ring
oxygizer
size
sheep
sheer
sheet
jugs
checker
musturd
coffeelate
friend
puepleish
mostly
that
wjite
uper
flowery
tuttle
bbehind
flowers
than
foregound
hammocks
inp
backgound
karate
apples
fruits
angel
loks
slat
anywher
bugs
breakfast
slab
tablein
stoners
lumpy
spidersky
fiiiiiyyaaaaaaaaaaaaaaaaaaaaarrrrrrrrrrr
batman
blueee
prick
price
landing
america
]
greyish
forever
rgiy
tooth
sunset
clearing
spiderwoman
ecar
cracks
spiderville
filing
foaming
direcly
scoreboard
giraffess
groung
grounf
fifth
ground
stair
chandlier
stained
only
btoom
sideewalk
cannon
cobbstone
bracelets
tlady
seent
held
leather
wierdos
peson
dbag
chicke
actively
asleep
hoes
sport
honeydew
ambs
colours
coathanger
skyscraper
between
ladie
whipped
croner
notice
pcture
article
greenbook
roof
wallaby
wheels
comes
snuggle
wreathe
passenger
jeans
stretching
jeand
tropical
backbround
homely
stovetop
stems
foggy
skiers
osterich
rainboots
these
estinfacaa
windchimes
handicapped
scum
nimber
colloum
alcoholic
soil
figurines
fllor
laggard
gringo
beaver
stickers
ship
worry
widows
coke
food
lite
document
qater
finish
closest
ye
foam
fruit
holdding
alligators
squatter
theater
charger
brill
utti
taxi
ck
cheesing
dancers
neon
shouler
greetings
touch
speed
topof
treees
death
struct
desolete
plorp
desktop
stache
treatment
leftwall
real
rulez
read
stools
blding
stooll
tinyest
amp
lady
headpiece
rear
lhama
hotsauce
t
winndow
ceremonial
vegtables
densest
palmt
sidwalk
tpictcher
kaiser
llighthouse
nuggets
gourhd
saftey
wheat
business
sixth
mircowave
habd
central
paints
choo
chop
wolf
itty
assassin
bitty
tilted
peninsila
your
grates
grater
log
area
aren
lon
lol
start
lop
cats
low
stars
starr
midcity
stary
coolio
satue
pitcher
multitasking
prouding
leftbe
trying
toned
stickin
irght
bucker
bucket
hirt
are0
impersonator
sqaures
juggler
describe
riht
nerd
cabinets
antenna
storage
valid
milking
you
yop
poor
poop
coirner
drift
peas
direfctly
podium
peak
coverage
pooh
pool
building
baloons
condensation
shelfs
blackborat
vines
leftrocks
roaaad
corer
strings
kiwala
monte
surrounded
skeleton
pointing
gown
surboard
month
childs
carper
carpet
 
glitzy
rtop
fountain
fguy
very
robes
screwdriver
mph
balancing
headgear
slong
robed
withoiut
heaven
bove
--
epeople
mtgropes
anal
doofy
cookies
fence
streets
orgasm
righthandcorner
firetwerks
darkness
orane
hoyrse
smotthie
basilicia
scoffing
loose
tracks
trunk
recycable
arena
colored
ahead
gangbang
creepy
soldier
amount
advertising
hime
laver
huim
limos
family
skoda
foremast
put
fromleft
toys
chunks
thatched
hapless
takes
windopw
ved
hardlly
belolw
fiat
botica
kayakers
broke
dios
mounted
grill
redroof
middile
yers
grils
pushed
celing
cows
magenta
ledges
menus
yelloiw
centimeters
lrft
wigs
fr
ft
trrreeeeeee
chastatue
brght
fo
a
doritos
bookbag
racetrack
anytime
frton
venidos
banks
egg
rbldg
chicks
help
soon
cyclists
soor
umbrewlla
forked
streetliggt
mcdonalds
ysailboat
mountsin
builsings
hendrix
kaori
botched
actually
shoobie
peanuts
fool
glares
yo
rwg
ya
closetest
smalledt
petted
yd
peeing
starbucks
foot
curtin
yu
foor
furthestmost
fully
trailer
barrels
positioned
tucan
cathedreal
sketched
beyond
item
miss
myst
midsection
wolverine
safety
ass
drink
picut
protruding
dirt
rude
balc
bottomleftish
dune
houses
reason
base
brightest
dirk
ash
algae
terrible
american
daisy
dankoramone
dis
rightest
onbookshelf
misc
reflected
wahever
hangs
mist
grirrafleeleee
briidge
maple
tulipanes
horse
mightly
mountiantop
belongs
station
trails
banana
rawr
bowed
selling
storm
behind
bowen
tapestries
brids
towars
grey
gree
store
leftman
gren
toward
entranceway
builder
mickey
kart
yeea
chipmunk
organe
wterfall
liegadas
juice
douchebags
yees
lid
lie
koala
lil
cave
officers
camouflage
lit
lip
swimmask
yellowlight
towards
wate
eater
wata
catrtus
aires
eaten
clear
dorrway
righrt
clean
tubes
tellow
hips
muddiest
booze
stalker
velvety
coaster
heavens
backfround
blackface
scooter
coern
pretty
circle
porcupine
rigth
treez
treet
peopleposing
poit
treep
trees
speckled
chars
treen
treee
treed
chimney
rocck
frotn
withe
sweaters
gloves
x
weirdeeys
treetrunk
throwing
wsurfboard
closr
seryi
descriptions
close
patties
bride
pictures
wow
abover
won
ipper
wok
probably
pictured
picturee
sface
ison
spray
cabana
invisible
zipper
both
botm
yahoooooooo
eggplant
boxers
undle
stoplight
headed
wgite
awnings
likes
bshes
vessel
cuclist
fontes
dinning
belwo
mountaiside
stamp
damn
heltmet
empty
topmiddle
partly
mturk
else
lives
liver
highest
look
spelunker
vlouds
rope
bikini
paco
biking
guide
loop
pack
petal
thinggy
ready
conter
shap
fedora
fruiuts
belong
shuttered
checking
squiggly
grand
holey
cornor
hallway
overweight
looung
vred
older
grind
seawall
yankees
flaming
coud
skay
phooto
canisters
cherries
machado
...
ight
haribo
radiator
showing
whispy
fountaijn
game
beighe
wings
eet
pillar
toyota
eep
bulge
mexi
sleigh
weiner
perked
coner
parade
creation
some
unbrella
mountainsssssss
teres
eating
plebs
rub
reach
rug
stem
step
scraggy
stet
feild
rut
gorund
ide
shiny
block
huilding
within
crash
lillypad
leftthe
pentagon
rolls
pad2nd
..
./
shift111111
triange
mouantin
ottle
rees
crapper
boottom
toucan
fishy
dull
peopel
skull
botles
....
refrig
frnt
similar
noone
hrose
shown0
adults
doesn
umbrealla
poofiest
dud3e
manns
nab
indistance
windiw
btwn
nah
nan
nar
weearing
preachers
electrical
tits
crouching
wihtout
formal
structure
lightining
e
guywith
dvd
literally
...........
berries
corpse
gu
gr
woooooooooah
gy
gg
go
danmark
shawdow
herpy
treetruk
mosque
nose
shack
woohoo
suite
botole
kitty
miners
wave
wavy
scrapers
gender
button
michael
wateres
booty
picket
ze
boots
jump
hose
booth
picked
click
sausage
plays
paintings
soup
edifice
cell
rotten
poles
playa
collins
;
paintingn
cela
melancholy
shoreline
weirdo
ponytails
whitetop
walkman
monumnet
gent
.......
products
wig
umberllas
clous
clout
wit
feller
cloum
........
hedgerow
singing
cloud
tcar
crap
remains
cray
camera
cheeky
crab
vehicle
hiding
remaing
cheeks
popped
chandalier
tennis
fuck
poppet
actual
mitsubishi
glich
anyhere
arched
wearin
ride
fbottom
arches
crossed
meet
meep
control
wharf
girllerft
lizard
pulling
hit
drainpipe
skirt
brownbox
campers
leabes
arrangement
located
burgandy
bandana
lding
circular
farm
billowy
fart
tsgirt
catty
cutlery
craggy
graish
mountanis
hray
bathing
thecandle
fattest
fresno
hedfglk
bluebbonets
including
pine
amdr
blakc
bckgrnd
broom
cloudsbo
mountan
towlie
hump
womenwomen
vergara
skater
frond
auto
potbelly
snorkel
reindeers
frony
hands
front
hippies
university
slide
airconditoner
pochco
pools
shaking
|
buildnig
mtforum
globe
poeople
inverted
sands
brodie
sandy
bpttom
playground
catuses
cause
umbrella
watermark
eco
umbrello
ohorse
diagonal
strpes
completely
undr
umbrells
farmland
florida
timer
keep
7es
behin
wading
shrek
behid
lefyt
bitch
art
driveweay
hehe
horseman
fella
paves
paver
buttondown
terracotta
adopted
attack
touristy
ankle
man
tourists
paved
exactly
pidgins
fuzzy
outline
buildongs
photograph
coast
bed
bbbbbbotttom
firework
grgabe
6th
ber
bare
bet
lightly
carrots
slighlty
recessed
skeezy
tabl
need
st
border
rotor
microphone
cranes
eagggglleeeeeee
telescope
scree
scren
so
penguiin
mountaintop
blades
ancla
aww
sewing
camper
monkies
connected
thte
layign
stereo
rleft
urn
upset
curving
prickly
gesture
nailed
avdert
cener
cute
kiddie
topest
crate
anyway
parked
soldiers
shoes
caktus
based
unfinished
tire
(
winner
brightes
brighter
bhahaha
rass
ayes
partially
holdes
genitals
tbh
124
125
sassy
tbe
gray
trucks
grap
shy
pedrson
gras
she
volvi
backof
widow
spotted
j
whatevr
shake
humans
freeze
whiote
computer
driveway
horribly
beachhouse
state
lue
tent
attention
dropoff
kicking
beaspread
police
thank
middleb
hits
middlee
ofvan
aqua
middles
koela
jersey
beteen
andwhite
quit
tnot
yay
windowish
pitstains
bricked
polka
cent
jeens
yam
yah
bskyscrapers
torp
shoulders
abouve
topless
bettween
smoking
chalk
veritidal
eruption
surface
swinging
undies
loweer
balloon
popsicle
empenos
parts
speaker
baord
akkkkkk
party
fireman
righmost
//
rift
reflection
salco
i
motercyle
well
foutain
bootom
rink
flexing
awning
bycyleist
spherical
taller
tallet
wtaer
missle
distant
rnear
ketchup
aobce
drawerlike
balloons
clouded
bottome
rafter
bottomg
railcar
ebut
chairback
bottomw
whatever
bottomr
bottoms
propeller
immediately
intersection
prominent
roock
doorways
lost
candy
sized
peron
lose
page
shed
shee
glare
shirless
belonged
whell
library
husk
groundddd
home
broad
froeground
grinding
fanny
?
coated
reaching
goatee
yues
suspenders
indented
freedom
beige
beigh
tongue
reptile
louvered
wallleft
cocoa
pplant
wondow
museum
noticed
inner
nikes
mounain
north
norte
triangular
fountains
eright
hi
ho
hm
glutes
ear
eat
piller
he
ritght
watter
tcorner
cells
signed
carriage
newspapper
stories
cello
rught
piece
display
intersects
embargues
utensils
balcony
ingredients
fencing
sidish
glasess
stumps
stonework
stumpy
star
climing
pleft
stay
ole
snowline
pathways
grille
friends
insed
chiminy
bck
rifght
portion
whoops
farest
andre
straws
asian
captain
whose
swag
hosue
fronty
visable
swan
yellowshirt
trousers
sorry
fists
weall
ofdesk
guardrail
vase
smack
vasp
lefthand
vast
baking
clothed
greenish
heading
upp
clothes
rofcks
creepin
floatie
quilt
warns
lavender
gator
lightpost
winder
nthe
cactus
even
lightd
cornergood
hazy
lights
nex
girlon
new
net
ever
helmets
mamas
wakeboard
men
meh
knobby
treeeeeeeeeeeeeeeeeeeeeeeeeee
100
cardboard
dree
dry
guuy
sjy
credit
drk
complicated
boogieman
courtain
mercat
sliced
standong
handlebar
landscape
right7
army
barks
arms
leaks
overhead
calm
typo
type
tell
calf
pacth
churchyard
peeping
adult
aligned
skym
rightt
flora
room
rights
rood
righty
candlestick
florr
foliage
rightl
rightm
roos
lighthou
vodka
blight
give
laughs
foods
skyki
shelving
thefagpole
leftleft
upleft
amazing
blackish
answer
vicious
vneck
bedon
grrr
frtont
waterfront
stalagmites
lesbian
third
mmountains
fungi
bottum
hangings
checkerboard
every
sillouete
ststue
deck
mounains
keyboard
windshield
before
skyscrpaer
mfront
,
blackened
crew
better
dialago
gents
tthe
one
leaner
meat
faraway
roast
mounts
sliver
bong
side
bone
mean
gargoyle
peeple
adobe
ligh
milas
ligt
sahar
forgot
navy
enclosure
headon
katazwl
velvet
perseon
mands
sparkly
content
turning
humpy
fave
bldg
hoodie
ehicle
blds
tabasco
aisle
shaggy
ist
ish
isn
murky
moving
fuckin
walkerz
hoop
unlit
walkers
lettuce
floors
comforter
ditch
hood
brock
pidgens
girls
twisted
girll
cabling
bouncing
somewhat
hadns
boarding
distance
litehouse
bits
heans
louder
silly
leadign
mini
packkkk
sees
palace
skky
modern
mind
mine
tortuga
wwall
seed
seen
seem
seel
mint
closeted
leftcorner
neck
boaters
planters
chest
chess
sleeper
nightstandon
tunnels
orangeish
treeeeeeeeeeeeeeeeeees
bananananana
tye
llamas
mario
artifact
themiddle
don
observation
doc
alarm
m
dog
breathes
shrit
emiddle
points
dor
pointy
dow
dot
isholding
chord
sown
stepping
abovc
folded
sugar
folies
folks
folder
disconnecting
wearing
ssky
glaciers
colorful
ponchos
rigght
stop
ahahaha
12
watermelon
tiled
watermelom
smug
foreveralone
bar
skyyyyyyy
fields
bay
baf
suitecase
bad
discs
bac
grilled
jailcell
bak
bah
sstarts
lettering
reference
fluffy
unshadowed
cocunut
owman
oruro
msan
subject
pebbles
said
redrock
sorta
sail
shaved
becnh
wetsuit
slighly
guilding
lazy
omg
lotion
nayone
upfront
picking
watchtower
neear
against
fng
ung
uni
sunshine
glaass
backgorund
winnie
cobble
height
lanterns
yaaa
springs
16v
three
tiny
ting
lovely
idol
deeper
mushroom
theppl
cieling
mcd
aky
jewels
gracias
tank
sly
reddish
ugly
near
lizare
neat
motorist
anchor
shamu
seven
cane
waterfountain
is
it
iv
ronbon
cans
io
in
mouse
ig
if
grown
bottles
coolr
make
belly
unfortunate
vegetable
bellp
bells
meets
bearded
ello
beinvenidos
kis
ella
anyhwere
waterfall
garlic
walkig
kia
albino
kid
butter
smoker
leaved
bedspread
horsre
tombstone
smoked
yours
left
yeh
just
sentence
yee
aside
fighters
human
yep
yes
duilding
marroon
sunflower
character
lllama
feets
backgrounf
flamingoes
background
forested
clickable
opn
shoulder
picutre
visible
nude
manual
arrivals
fruitbelow
mnoutnain
shouldee
signposts
signal
buoldin
deal
tortose
dead
wihte
dear
skty
sprawl
total
dense
pail
carts
juust
microwave
skateboarder
sife
udnerneth
cone
paid
bolw
headstone
abywhere
yelling
commie
ribs
magazine
vaginal
meerkat
rght
sheets
lied
liek
chimp
rearview
negative
capris
qhite
carving
birdies
cones
hrrahs
flying
bundlel
jpix
bolivia
bolivie
fork
form
foilage
cimniy
fireworks
bery
pinnk
fore
ford
berg
lowr
diaper
fort
pavilion
builds
hikers
stilts
attached
mountnain
tangerines
boomerang
tringali
glitchy
basilica
sticks
toss
covers
sticky
obove
flaag
aboce
floating
mountainnnnnnnssssssssssss
shit
holla
fosters
generally
handed
paninng
ofclouds
hangin
butterfree
ccar
shietless
poderoso
feld
jacked
happening
potato
jacket
gorilla
teeth
jackey
mountans
woodwork
milf
peole
skin
bomber
milk
yummy
show
father
bordered
0
finally
marsupial
string
moooooo
bunnies
word
stting
dim
tumb
limes
did
die
dif
moubtain
bikerl
bikers
wattah
righyt
brownish
heeads
dip
round
drawings
villa
nighstand
run
skiiers
pussycast
gazebo
filled
frence
friont
bckground
french
lakes
preferrably
wait
box
boy
canadian
bot
bow
gloria
boo
trinkets
massage
bog
dick
cloak
kayak
lamppost
rg
hotels
everybody
pidgeons
lockers
thrd
dude
pers
peru
thru
abve
oof
ssssssssssssssaaaaaaaaaaaannnnnnnnnnnnnnnddddddddddd
dresson
obelisk
oon
----
middlle
yeeyeeyeyeye
motocycle
olive
stitting
robe
fly
walled
christmast
thermos
avoiding
soul
wallet
sour
bulidng
9th
growing
making
lifesave
nearest
crazy
abovve
confused
greenest
drawer
sliber
pink
necklaces
windowed
sundae
raya
sword
tile
pathway
drapery
map
mat
may
sno
grog
patchof
blowgun
guyy
hombre
scalloped
tablecloth
guys
grou
colulmn
waist
anyhting
maybe
q
cascade
switch
pickets
cascada
basket
tall
nect
talk
rcok
builsing
dojo
fronts
shield
longsleeve
entryway
pointed
pillowcase
grassthings
roight
pitch
immed
pointer
bototm
buttplug
group
monitor
thang
racecar
groud
tweety
kahki
mail
groun
main
ladyface
farmost
binki
killer
lunch
touching
markings
safari
ledt
slgihtly
arrows
rocs
cityyyyyyyyyy
zingy
naokin
rock
guevara
midke
agin
signage
curtian
girl
giri
ouline
living
jackson
3rd
pedophile
biilding
ehead
plantin
palmtree
bday
correct
earlier
monster
leannig
sideways
ort
brooks
worries
california
headband
orb
thins
waiter
headphones
moutians
thing
funky
jumping
roofline
firsr
think
waited
first
exotic
cheese
dwelling
carro
americans
long
carry
wmountain
grassline
little
pavemetn
lap
lens
while
anyone
plains
skyyyyy
speaking
eyes
bottmdirt
buildling
crazyblack
miggle
sleepingon
erosion
atthe
dustcloud
butt
seat
11
10
13
btootm
branchs
14
17
16
19
18
browning
cneter
protected
were
gigantic
leftall
tractor
coconut
lick
reght
occupies
foooted
dash
himself
wfall
portrait
nazi
speakers
hooded
efficient
sittingon
answering
foreigner
upside
clonds
middleback
200
skinned
207
normal
track
canno
sunglass
pair
beachfront
napkin
uppre
sattelite
fartherst
steops
grassland
gound
shop
lightfixture
shot
rfight
flippers
wifebeater
aventura
bedside
shoe
corner
stnad
takin
chruch
cornet
teeny
trree
enough
black
raising
fanta
plums
roadkill
get
gey
grouple
nearly
ged
blends
sideway
lleft
lilypads
inred
median
yield
across
femce
stupid
flamingos
anthing
seas
middleperson
blurred
lyfe
seal
calendar
vita
curch
wonder
camping
sleepin
ornament
kight
label
behinf
behing
pump
behine
diamonds
reading
checks
infrastructure
parent
betwen
darkbottles
killing
jl
jk
singers
whitest
tub
z
loswer
bldgs
dky
hightest
shead
sketchy
edith
dwellers
iceburg
rrooftop
anyplace
grond
unusual
tabel
undershirt
caar
laama
rightmsot
barre
judging
cantelope
stky
grassypart
aainst
mary
rpcks
marisa
shopping
squash
oceean
hardcore
those
^
stacked
turtles
bbbbbird
preson
cloouds
ratchet
coca
cock
middlw
coffee
sleeping
middld
middle
ferns
restroom
bagr
bags
par
pat
bagt
doctor
pay
multicolor
same
samd
pad
ani9mal
pam
pan
oin
oil
fartest
oif
irhgt
hullo
pinapple
loarge
inbetween
climbing
totally
guyu
drain
grp
byciclist
manwoman
bicyclists
bottle
condle
bottlm
gates
peace
palnt
money
fatties
gated
bicylist
blackshirt
lightbulbs
ruight
nick
hamock
backround
pile
4
hround
carring
pill
yhellow
moo
lefest
mom
whte
mob
railroad
blankets
grin
vertically
vending
rockz
server
facing
audience
laughing
buidling
sneaker
doll
thething
skinniest
erase
pasture
joan
matching
pichu
gross
hallawy
confirm
colonial
reflectors
overly
plauqe
2sp00ky5me
doggy
knife
smiley
raincoat
kyoto
broken
drums
roaming
strangled
secondf
secondd
othe
island
aroudnd
mixer
airline
pockets
mixed
threesome
road
whites
whiter
bountiful
yyy
harness
strip
cmonnn
mark
nountain
skynot
mountaon
downed
lions
mouuntains
chcik
buggy
divde
tripod
wiping
yupo
walkway
blazeit
corse
spice
cacti
standds
peeking
netting
suitcase
traincar
paitent
rapids
layinng
deer
deep
fellow
file
cables
again
shaddow
jenga
field
relection
curatin
shelter
caminito
browin
margaritta
weelchair
fntel
turtleneck
landfill
cliif
sewer
u
lightbulb
god
starting
cameras
pastly
.....
looper
vechicle
leftmosdt
children
preserver
toleft
k54
skeapker
efront
sittine
sitting
puffy
scout
fall
surfboarder
falg
stipped
alien
andmiddle
windowpane
pathch
cruthes
bakground
jimi
wman
neighborhood
burger
lammas
catctus
furthes
further
ribbon
creatures
dial
swampy
abd
waall
stool
gj
redshirts
abv
garth
faaaar
plush
bowtie
mule
ranges
cylindrical
situation
cnter
anywehre
yessum
playfield
storefront
airport
narrow
blacjk
twisty
peering
bllue
clapping
lwft
enar
clound
eye
oclock
two
eys
lassie
raft
diamond
shrubbery
canon
constructs
landed
lemons
pavedway
udde
town
none
cluster
der
sucks
guards
del
dem
def
shark
hamburger
buttress
gravely
sphere
midlake
numbers
pinks
!
needs
awkward
guyin
maps
yahuuuuu
ostritch
rigbht
diretly
waer
number2
blood
coming
kangroo
bulldring
hourse
gravelly
orchard
crowded
coat
paw
eats
dragon
roundish
coal
maan
playing
sculture
ok0
rounded
earing
rounder
through
lava
purpel
messed
piscina
22
balon
thnx
gazelle
28
handheld
centermost
dmand
worshiping
peni
someone
dusk
wallk
males
walll
walls
fruiit
viewers
bityt
pal
2d
goofy
buttom
cluods
everyone
delicious
house
fish
hard
idea
extended
fist
backpacks
flower
flowet
nottom
pigeon
toppish
print
foreground
foregroung
ladyperson
motherfucker
mmm
toy
beginning
blossoming
running
wither
oddballs
corkscrew
coocnut
copper
topleftish
donw
treetops
windiws
.//
done
lampposton
dong
cups
cupt
upeer
pantsonleft
videographer
5th
jetty
least
paint
airs
mama
compartment
pare
peple
drapes
park
trolly
dentist
part
adutl
believe
peaked
b
kapow
feathers
outta
windoes
buildiong
cept
rockface
aged
fading
mountain
umberlla
cardigan
rower
built
dancing
blanca
pinkie
couch
build
rafters
mountais
eggs
flute
chart
tarmack
chari
most
moss
bbed
extremely
refrigerator
kris
futbol
organish
ky
spdiers
atbottom
hugging
hillside
landbottom
perched
fine
find
giant
gradma
ruin
chimey
playe
2person
idiots
mointain
8
phototototo
boulder
buhs
batter
breast
theft
sill
merchandise
silo
spikes
spikey
paveway
bikeer
watever
ebench
orca
vine
ocrner
lion
individual
slull
please
fans
smallest
cutout
champagne
sigin
pagoda
purpe
pepsi
nitestand
descible
surffer
restaurant
archway
pavers
afar
leafe
cakes
danced
point
simple
dancer
clowds
laod
furthers
weaving
helmt
foregroud
instrument
foregroun
dropping
peppers
flyling
meeting
vans
banananananananan
gay
gas
gap
gal
donket
fur
grains
talking
solid
fuy
tiered
sittinng
traintracks
fun
fuk
vroom
cents
decoration
rihght
farleft
calender
facade
leaving
cente
righthand
leafed
corridor
docks
windmill
infrotn
strips
tupperware
hawian
rockss
leopard
desks
stripe
tocuhing
aggregate
sandals
beanie
panelling
verybottom
flags
y
entry
paneling
ghead
snow
shape
bedstand
backriver
granpa
anythiong
goatees
cut
rgt
cup
kilo
gril
cuz
source
hammacks
impoverished
hates
bin
overhanging
bik
big
bie
squashing
bit
bir
semi
glove
bamboo
walrus
valleys
rede
bacl
magnificent
back
bach
mirrot
mirrow
mirror
candle
cocacola
montan
scale
jewelry
beneatpeople
visiable
bball
per
cast
pen
peo
sneakers
pee
either
cameraman
ufo
windowpanes
use
oen
behindvstrip
goods
piles
fron
piled
beans
cabinents
ppl
fuit
trre
aliens
invading
framed
frames
jockey
bottodude
few
snowbank
ediface
forward
sorrrry
pimpin
boys
pictuer
jags
lifeguard
eethe
murica
planes
jumbo
geese
stripped
blur
rtight
creeper
single
curb
cafe
righside
%
pails
himlayian
beow
gromiddle
mellens
yangs
blye
buildong
fisher
desert
uhhhhh
overlooking
cooker
flowerpot
cooked
2001
bergs
2005
lizared
stroller
staute
14172
ttrees
muntain
penis
bulkhead
groceries
snowmobile
golfer
graves
late
lilly
bottomed
  
queen
porton
dessert
lefmost
moun
huddled
grid
crosses
putting
entire
verandah
botle
greenboard
grooved
mural
thebird
nests
croc
treeline
3x
giving
pipes
paddle
napkins
dolphikn
yllow
body
dwon
objects
sink
others
sing
extreme
stalks
33
betwenn
30
36
foreworks
climb
named
baskets
limo
oval
multitask
lime
cha
che
themselves
inthe
perople
iguna
yelow
trait
togirl
kiosk
thatch
trail
train
teenis
iin
account
britney
f
tunnel
pthe
goalie
obvious
gwater
snacks
yeaaah
bonez
bones
bottomleft
greenary
native
lamb
lama
cinderblock
lame
holds
formations
lamp
forest
volkswagon
furnace
profile
buildings
de
fram
hight
collection
bluff
buildingl
drape
chasing
hefty
sit
lines
friendzoned
sebra
quiaca
minivan
lined
mustache
eggplants
lantersn
grampa
hugged
horns
gramps
horny
bunch
bridger
bridges
le
tsh
la
ll
poeple
lv
lt
squatting
lbue
pottied
<
dad
descriptive
dab
dam
muddle
dat
cutting
das
skyscrapper
meekat
swimers
backboard
shrt
rowing
glafs
beween
lft
biulding
sweatshirt
popping
mats
hedges
baldie
stub
raisded
oriental
stud
alpca
smog
rea
ref
reg
red
ree
jessica
huddling
retards
backwards
yard
mtger
skateboard
yarn
moutainish
anwhere
south
bricck
ltop
ftrees
sack
puppet
sacs
reached
raggedy
braces
ancient
buish
monkey
laps
pots
vagina
balck
monkee
messing
liquor
cabin
flume
gear
nobody
hald
bbottom
gead
silenceinspace
babys
anywhear
stnding
lover
bavery
piff
waker
shhet
curves
tide
cavern
have
curved
apparently
biege
complete
mia
mic
billiards
mid
parka
tapir
bemused
furtherst
thoseare
masts
sedan
cloned
payment
murial
skinny
normally
planks
recess
yuppyupp
retarted
text
charles
undewr
thicker
sanmd
ksy
bien
controls
elft
stripey
aread
stripes
bear
beam
bean
beak
bead
dirth
striped
lelt
arear
areas
aboveright
ashtray
calling
mercedes
biottle
cycler
cycles
costume
farthest
puddle
intertube
hipster
farthese
shallows
graffitti
pattern
grassh
purses
hammock
fomation
mown
redshirt
outer
:)
taking
equal
boulders
tater
swim
passing
groundleft
masses
vent
statues
gone
oans
denim
pedastal
dround
laugh
landabove
pouring
swimmer
muddy
picute
ah
curtain
walkn
angled
anyperson
cotta
palmish
womens
preforming
ridden
redhead
cor
bull
bulb
leftholding
bule
homes
multi
plaid
plain
nd
tshirt
rectangular
frustrating
carved
planets
almost
lefft
closets
partner
liitle
grinder
oine
)
landmarks
surrounds
chandeliers
whirt
blooms
standingman
stamen
yiou
econd
fucker
binoculars
ion
rightof
croissants
retard
center
weapon
atenna
wiondow
bluest
thought
oops
sets
position
procks
drivers
restuarant
ny
seatg
stores
seats
protecting
flashlight
ads
gmc
lake
bench
mturkgrind
adn
crops
hurry
smart
fyi
woodchips
flamingo
like
excluding
sofa
bgnd
bikewheel
embarque
dickheads
chica
chick
works
soft
italian
halfwaybt
backpac
backpak
hail
hair
happens
shrub
dunes
moutanis
pisco
students
screwed
llamma
chains
panes
pepper
7up
      
slight
crossing
krosco
panel
about
:-)
mirro
boards
tomb
backpackers
submits
socks
guard
female
flamigo
fourwheeler
gthe
wack
ridge
pictur
vegetables
pictue
biggest
maze
chunk
ivory
buy
bus
brand
but
bum
bookshelf
kraft
bug
bue
misty
wish
guanas
mouintain
condiment
skating
pik
slivver
colum
marmot
pic
pid
pie
pig
pix
tabletop
shooting
pit
baot
loft
walkling
dressed
45
oak
detail
balcany
oat
oar
ledge
granite
moumtain
weears
dresser
gtree
bundle
brownness
booboo
bilboard
goin
stirred
shulder
pilar
hiker
iddle
4h
yelo
yell
foreround
8th
goofyball
hats
derp
sleep
hate
poorly
trolley
feeding
allll
patches
rightish
vorner
twees
teapot
tween
under
besside
verdant
carried
merchant
@
hat3
rise
lurk
rner
leggings
jack
fireplace
monkeys
school
parrot
matress
hangglider
rgight
pagodas
cloudiness
mountainange
enjoy
bicycle
throught
feathery
greeeen
aobve
direct
surrounding
street
shining
blue
blug
bycycilst
selected
firstwindow
liberty
lampshade
bluw
blus
beater
disney
ramps
bech
smokin
whoite
path
digits
windwo
forum
luggage
mokey
bloomed
leaves
changed
wondows
rockwall
leftood
midway
julio
prints
straw
strap
righest
meats
direclty
forums
would
spiky
blacony
behnind
skyyyyyyyyyyyy
spike
brushy
phone
turqoise
pouch
must
me
ma
embarques
peolpe
mt
ms
mr
entertainer
my
pinecone
decorative
dolphin
zthe
sittind
times
end
bunk
rodelu
buns
drummer
gate
dongs
description
mess
pokey
lump
mesh
poked
salsa
mesa
parallel
skyyy
danny
cofrner
windoow
jungle
enter
foundtain
browish
sprout
over
smilimg
mountiain
underside
lampost
oven
strangle
spotch
beside
frunt
cluds
furhest
flowerbed
writing
destroyed
tramp
phallic
pettle
pantleg
dooway
tourist
plaster
clocktower
miiror
pinkish
sohrts
shadows
swaying
potatoes
shadowy
greenwsall
wiright
choir
holdin
each
yatch
assumingly
tumbleweed
cloths
topright
celebrating
lamppole
riight
poncho
large
jackets
gon
driving
thetiny
haired
motel
washed
laid
got
gor
splashed
arizona
hang
bottommost
free
formation
rain
nnear
insaide
grassey
bannana
grasses
sode
chian
soda
onto
already
puce
behidn
chcild
accent
headdresses
perswon
top
horizantally
perching
tow
tot
655
too
tof
toe
curtains
ceiling
guhy
centered
briks
brushes
took
wrapped
wusses
wardrobe
postcards
standingon
reclining
bloated
aztec
flame
beard
verty
raf
bridge
donkey
biildings
seagle
leaft
rat
rar
pylon
leafs
leafy
rioght
1967
-
isolated
grodn
hatch
snob
rides
rider
birke
bsx
dadays
though
bilding
bsh
bse
lilliacs
lifesaver
flor
metal
moleft
pineapple
exvept
painiting
random
popo
colors
radio
earth
peddle
abo
thft
grassless
belltower
tablestand
geez
sunglasses
aany
coblestone
uhhh
watch
geek
piers
sunglassed
geen
wedding
rightsdie
frying
beads
prple
twice
ruins
farther
nut
winfow
nun
roght
disturbing
noodles
mud
mug
finger
hopefully
gravestone
drivin
confusion
boss
wear
news
flowering
surfer
faced
flooring
fault
builing
players
layered
games
faces
standings
ehouse
churchy
towels
majestic
hitler
bingo
bathroom
pedaling
moutnain
ropes
been
blower
beer
graasy
dunebuggie
containers
sprite
grayish
apartments
flowrs
teenagers
areea
humanbalh
catch
glider
d015
n
begind
weren
ugliest
teachers
cracked
wft
pyramid
upperleft
handrail
bottomof
tress
staure
spiderland
nike
forehead
complex
leftist
papaya
peaks
disatnce
pick
leges
characters
leftish
cycle
tassel
tarzan
ocean
holdimg
bettwen
mother
huuuuuuuu
jean
shadowed
skyyyyyy
laptop
rodent
thumbs
celiling
anamals
columned
5x
furry
elf
sprinkled
pciture
anythign
hiway
transit
mountian
turquoise
plaaza
mounds
breaks
roack
spawns
intertwined
51
50
any1
specific
officer
hung
amor
hunchback
petting
donald
meters
ice
everything
icy
skylight
mirage
fafe
christmas
buildin
khaki
lampo
corn
buildig
cork
lamps
corr
cowboy
rained
dinner
hatperson
froze
ahh
fern
skyyyyyyyy
aht
roundy
cubicle
rounds
git
cusquena
blule
sunlight
why
virgin
greenblue
tellest
lage
ballcap
heaf
head
medium
swimer
conrer
tumbleweeds
hear
solar
tacky
epart
ruined
glassdoor
scrabble
widnows
supe
camara
trim
cobbled
trie
darks
cocain
check
pipe
outstretched
     
no
tit
na
nc
when
tis
tim
tin
setting
papers
np
tie
nt
evergreen
ridged
eiffel
ridges
younger
faster
bullet
yacht
girlds
whoooo
backward
stacks
coach
rom
roo
sinset
turktime
rod
ouch
leads
rop
leady
bdlg
row
balding
contemplating
peng
melon
curitiba
uppder
fleece
artwork
hatted
cool
rightthe
clouds
couches
level
hous
peeps
brother
cloudy
fornt
cloudd
htewm
leves
says
porn
sandcastle
cubboard
inland
theright
dried
pedo
bales
bakc
drinks
stands
unripe
spire
trainful
tarmac
goes
tarmak
hairy
groupd
water
baseball
groups
wayer
[
haird
fman
skkkkyy
ladys
foiliage
weird
eback
ceramicware
motherfucking
buildgin
ranimal
lowere
1st
spidies
peep
horizontal
bulbs
runes
foregroudn
sports
msn
handles
frothy
australian
today
shinny
rios
peices
clicking
altar
aright
cashier
drown
beers
lefttre
facce
judy
vally
ferry
coral
overpass
performer
figure
alpacas
sandbar
kys
counting
trtees
nubes
sailboat
monuments
1
fperson
fourth
righjt
asphault
righttt
cocktail
wachovia
ri9ght
ruiins
staris
sportlight
4th
tipped
wakeboarder
floral
eighth
classroom
branches
liquid
octopus
surfbort
liquir
hilltop
shinning
snorkle
blocked
platform
continue
millon
besife
swans
whirlpool
lonely
sidebottom
underneath
cowering
lowestringer
bath
dscreen
wagon
name
cornerr
corners
tere
ooking
cornert
lght
cornerf
greenbottle
corver
trunks
siling
torch
zebra
betweeen
exclamation
pokin
cactuses
kanoe
catuts
eagle
patios
booby
castile
hull
boobs
flyer
kerouack
heheh
theway
yup
motion
turn
place
swing
turf
motherfuckers
spiraled
pelican
mor
buidings
array
pokemon
stuck
whitw
earthy
plastic
white
hug
terrain
huh
hut
cops
vegggies
copy
holder
huy
wide
ferrocarriles
oleaning
r
cards
mariner
powder
and
montain
otherseal
ant
ceil
ans
windowsbottom
moutains
any
superman
secondfloor
dining
surf
waterrrrrrrr
hooves
sure
multiple
tornado
clearer
falls
boiling
frie
cleared
donky
seafood
shooter
heat
slope
leftside
salida
backsky
cheap
phoneon
mouintains
spaces
trop
bankment
brige
gull
written
wood
skrit
lighted
tock
playah
spedo
lighter
eduador
dye
hedge
spidersuit
freaking
beastie
signt
pinnacle
referit
rightsky
enterance
penguino
naked
penguins
everwhere
dough
bought
grafetti
picnic
dickhead
parking
guyes
surfaces
crystal
munching
outside
arrival
guitar
hestal
diners
20
cities
come
whatevers
region
nerds
railway
polw
acron
whoitye
perrys
color
armchair
pot
pos
pop
poo
pol
pom
vvery
polo
69
pod
poll
skeletons
turkey
turtleeeeee
rgiht
uppper
coupe
eiter
helicopter
hardly
squatters
engine
direction
andrew
tiger
careful
pilow
pilot
case
shaft
casa
wmoan
spiderman
mount
twigs
nothingness
cask
groundd
dorky
furthermost
mound
vest
telephone
couples
good
trandformer
rungs
helmet
alphabet
bowl
bown
acros
dudeman
yault
isle
personb
ni
nest
frombottom
driver
weed
persons
puke
statue
changing
cartoon
keebler
sumbrella
without
model
grounds
bodies
manss
lifevest
tip
yellwo
stakc
clou
5ht
kill
tbale
secftion
kneeling
halfway
blow
widest
womans
rose
seems
except
laddies
lets
blod
blob
hind
womani
catface
undder
mountaibn
glitched
fridge
glitches
furniture
towel
blackboarface
patrick
buddies
bracelet
fount
tower
picture
ceter
betweent
tannish
bottomsk
cowboys
nutti
slice
douchebag
shirtless
moon
peuple
buddha
reachign
provides
rawhna
football
lmfao
beached
nails
pooch
_
on
om
ol
ok
oh
og
of
oe
od
oc
ob
shrimp
rightspider
stand
ot
os
or
buyilding
ladies
rafts
instruments
betweecn
clams
rising
burton
upstairs
buds
mandalay
cadle
there
hazards
strick
poleon
retangular
racist
valley
energy
jug
vested
amongst
cabinet
jus
burro
jut
rosebush
longer
grash
grasd
mtchris
cloest
wavvy
nightlife
tside
daigonally
grass
creeping
anwyhere
toilet
tasty
incorrect
bgiaz
bicycling
idiot
rubber
roses
5
rockline
trash
lifeforms
lewft
byleg
pillows
symbol
stocky
siode
bounded
brass
stocks
swirlys
semicircle
srry
calls
wife
curve
curvy
ledgde
snading
platter
all
lace
chinese
wreath
buiilding
seals
hosre
dish
follow
grren
apartment
lining
jig
bottomleftcorner
watefall
belonging
woman
song
far
fat
focus
fan
sonw
fac
ticket
fag
trench
celling
wter
highway
lisa
feirld
teh
ten
tea
tee
breakers
design
tes
yw
crouched
babylonia
sunray
what
sun
crush
suv
kyak
sup
racing
guns
middele
toes
doorframe
tags
lio
shouldn
themself
couuple
pengiun
avase
verry
extremem
cucumbers
bendigo
thewoman
camcorder
sticking
lefter
screens
pnts
catador
buildingon
ddue
bleow
possible
horses
flat
underprivileged
mellon
knows
grabbing
glas
cyep
flag
flaf
basically
pews
biush
flah
glad
sleeveless
buildding
v
palest
pony
ponk
pond
pong
extinguisher
court
dreads
peregrino
khakis
breaking
stemming
buenos
tepee
goat
sandwich
okay
headrest
rainforest
headress
fungus
lighting
buldings
short
shady
shore
vegas
shade
helment
handlebars
doorknob
mission
floooooor
anytop
style
mountasins
pray
inward
sale
mattress
meft
blenders
fido
bout
soccer
might
alter
wouldn
sucking
fuckface
framework
bigger
buildilng
bacground
cobblestones
aligns
bruzual
yelluh
cgame
pirates
weight
posts
fixture
kobe
scratching
alcohol
sliglty
cloude
lols
sealion
hill
lolz
protion
roofs
steeple
teach
sidewalk
roofe
bushes
hiroglyphs
bluiding
ladyyy
wll
bushed
snowboarding
fallen
paino
ding
fancy
feet
fromt
wench
blank
undernearth
story
"
hangy
leading
themountains
comfy
rails
stork
streewt
passed
grimy
outcropping
ecuador
biiiiiiiiike
hotel
secound
blondie
haning
rifle
surfboard
king
kind
double
illegals
stall
stalk
dang
staiirs
oabove
skyscrapers
jsut
hanglider
rugt
rugs
eperson
eft
cropped
electric
rapist
fresco
77
cigarette
75
nothing
pavemen
patterned
draped
miror
busushes
windows
doggie
windowt
mountisan
windown
lying
chandilier
stones
stoner
loveseat
asphalt
pennies
rto
stoned
spastic
font
btotom
leaces
breakdancing
atv
hip
his
triangle
visble
hid
longest
aminal
saluting
hil
him
typos
tgree
ofyellow
imddle
emouth
paintin
bars
stump
gawd
thye
arc
dumb
are
squarish
bark
arm
leftest
barn
orisha
bboat
creme
various
solo
sole
uup
outfit
conde
laughign
condo
wather
bronze
c
sloth
roadddddd
sweet
betwwn
dudes
handstan
weasel
dialpad
village
goats
duh
ps
pp
steeples
dud
due
appears
cosplayer
pc
pa
pf
pg
brick
pn
pl
flight
haldf
cliking
rocking
plants
treeeees
georgia
aboe
frozen
sheeple
gem
batch
barricade
abov
moustache
canter
rit
demon
windowspace
rip
rio
rim
nightstand
rig
qat
brownest
shirt
peoplem
wierd
shire
peoples
9
churup
itchy
yucca
shirl
peoplez
higher
arrives
paths
cement
mountail
birck
humanoids
lblack
lower
edgr
atcha
cheek
spindles
anybody
edge
turkin
carport
pigeons
grotree
montsn
prince
gems
tables
loading
tablet
brach
workers
thirdmost
plateau
middleground
lfet
biotches
yessand
sittin
manatee
threes
plaste
moountains
flappy
shaped
buildngs
corneer
botoom
sprinklers
necklacke
fucking
marmoset
litter
ysky
clown
do15
bottomscreen
rifder
louds
skycrapers
rightllama
isles
boke
leftmost
prob
bookshelves
lawnchair
bootle
plaza
wineglass
surfers
range
foood
watermellons
wanna
cutoff
papyas
sdeals
because
iwth
strumming
alpacka
canal
impressed
rows
stylin
lone
4rd
fast
bruh
hammok
sections
fase
mountains
fabio
mountaint
mountainy
fabic
cloth
tshirts
filed
upright
crane
mountainn
shutters
penguin
theperson
fries
highlight
fried
called
steepel
cutain
perosn
warning
km
plantarputs
bklue
rainbow
lemon
peach
rains
riiiight
mansonry
backs
gry
grouped
sphynx
grl
nice
mustard
booger
shifrt
cannister
breasts
helping
insect
posters
postert
pottery
trukc
pompom
betweenpersons
gaminito
watemelons
alongside
bulletin
carridges
buffalo
flapping
windo
lean
steve
windy
uner
gang
cupboards
bldng
fenced
corrner
anyting
stable
include
fences
waiters
rag
ague
grases
agua
heard
spoon
drinking
bryant
girkl
notes
pasty
smaller
middleish
smallet
furnitture
lightest
bookstand
ummm
pinapples
derpy
gress
checkers
showcase
yiss
sarry
waiting
checkerd
overhaning
kangaroo
pushing
oars
sexy
malboro
aabove
cyclist
larger
shades
rhombus
headless
bickers
armpit
shaded
reds
shovel
apple
himeself
unhappy
motor
duck
ape
fed
fee
from
hippie
usa
&
someoen
frog
surronding
fet
fer
weeping
eagles
inet
sort
clever
porch
musician
accordian
heil
rabbit
fenceline
women
wtih
napking
saddle
zurit
anywhere
posing
dirrectly
tau
patrol
tax
tad
carrot
hilton
something
tab
tal
tan
onions
sir
pure
six
sidewalks
swear
sidewalkk
opeople
sie
sid
instead
sidewalke
gurl
colums
puppets
cupboard
islnad
cuilding
wrist
moutnains
mountaines
lighy
sculptures
light
honestly
crawling
necklace
martini
ottom
5171
rusted
thingymajigger
iquana
looks
middlde
horizontally
horsie
leftvisible
woindo
ships
brdige
h2
choose
inspecting
orange
covered
edging
sunlike
orangey
frassy
casrgrey
flour
material
oranges
drawar
kiker
mushrooms
easel
crt
kangarro
tram
haed
tran
bttm
blacktop
cursive
tray
whiteshirt
whitish
pictuplant
khoala
our
80
out
stutues
gatorcroc
fround
lefetst
bottpm
supports
girrafes
utensil
botomm
waveboard
pendant
bigass
ltr
tanker
g
barny
birthday
beggining
steamy
lilypad
umbrellas
righ
snowcapped
froup
their
camels
brwon
rigt
shell
centter
shelf
shallow
slider
reflecting
bhind
thingies
behinds
fronymost
patients
moto
sculpture
bottole
blie
meatbag
plantlife
cvhair
clif
engrish
clic
mouttain
snowcaps
grouond
angle
catus
russians
roup
which
asshole
=
vegetation
patchy
centre
who
wht
ht
class
statute
rfar
looked
ballons
movie
fied
spindly
stove
swizzle
colorfull
fountaine
chickem
chicken
darkest
neares
nearer
ha
beghind
sunflowers
piano
cube
watching
dope
flirting
awww
ones
words
chips
rite
ghetto
ballooon
belts
fronmost
waterfalls
view
europe
kanga
wierdo
iomage
closer
closes
closet
keft
closed
closee
untop
pants
opening
huts
job
stucco
hobo
titties
lifeboat
hammack
grain
bronw
canopy
hoody
vilacoyo
wall
onlyany
narrower
tablr
walk
inbetweeen
girlsitting
table
motorbike
rusty
trademark
porting
decend
wabbit
painted
farmer
partitions
backback
walkways
backgrond
vanilla
will
hovering
skyish
woooooooooooooooo
patheway
wild
happened
layer
barely
rooster
dual
strucutre
bunkbeds
perhaps
plaques
headlight
cross
pavemant
member
inca
geographical
largest
inch
wooman
onleft
gets
tomatoes
difficult
rockpeople
uros
beast
coaches
student
pedal
whale
collar
flooranyw
english
theother
bending
camel
innertube
bongo
emtpy
volcanic
fishing
rocked
deios
sku
rapid
drunk
sky
other
jars
ski
boom
knob
know
eleft
press
doughnut
hollow
buder
opera
1566
oraneg
nigga
clusters
mattresses
scared
cirlce
growth
wodden
bottleon
leaf
lead
belw
miner
syfy
................
corneri
bwteen
locate
poerson
dangling
slut
clift
spokes
pasta
fluorescent
liscence
raise
bottorm
ponytailed
columb
incline
getting
column
skywater
fear
carrier
sweat
mpuntains
piky
owl
buildign
hishead
loner
weather
champ
brush
birdhouse
yankee
lfar
van
stucture
artifacts
tabke
*
ewater
spiral
continental
dynamite
curtaon
fiiiiiiirrrrrrrrrrrrrrrrrreeeeeeee
shand
bitches
collum
squeeze
made
hardrock
beackground
gondolas
below
staue
cake
faggot
rickety
skydiver
subay
maroon
---
boardwalk
goodness
trailing
limb
booy
clickk
boor
boot
inset
curtained
book
catcus
branch
farside
boob
rial
boof
sloping
lance
junk
mulch
shown
knee
sandwhich
kinda
sandles
geysers
bnananas
cliff
jewel
heidi
sleeves
pods
brickds
