# Supplementary material
Source: ML conference proceedings conference paper supplement (https://www.ecva.net/papers/eccv_2020/papers_ECCV/html/123550052_ECCV_2020_paper.php)
Supplement: Supplementary file 4 [file 123550052-supp.zip › code_of_lscm/run.sh]

#!/usr/bin/env bash

python trainval_model.py \
-m train \
-d unc \
-t train \
-f ckpts/unc/lscm_model_p2345


python trainval_model.py \
-m test \
-d unc \
-t val \
-i 700000 \
-f ckpts/unc/lscm_model_p2345
