# Supplementary material
Source: ML conference proceedings conference paper supplement (https://www.ecva.net/papers/eccv_2020/papers_ECCV/html/123550052_ECCV_2020_paper.php)
Supplement: Supplementary file 4 [file 123550052-supp.zip › code_of_lscm/trainval_model.py]

from __future__ import division

import sys
import os
import argparse
import tensorflow as tf
import skimage
from skimage import io as sio
import time
# import matplotlib.pyplot as plt
from get_model import get_segmentation_model
from pydensecrf import densecrf

from util import data_reader
from util.processing_tools import *
from util import im_processing, eval_tools, MovingAverage
from LSCM_model_p2345 import LSCM_model


def train(max_iter, snapshot, dataset, setname, mu, lr, bs, tfmodel_folder,
          conv5, stop_iter, pre_emb=False, use_tree=False, neg_num=0.1):
    iters_per_log = 100
    data_folder = './' + dataset + '/' + setname + '_batch/'
    data_prefix = dataset + '_' + setname
    snapshot_file = os.path.join(tfmodel_folder, dataset + '_iter_%d.tfmodel')
    if not os.path.isdir(tfmodel_folder):
        os.makedirs(tfmodel_folder)

    cls_loss_avg = 0
    avg_accuracy_all, avg_accuracy_pos, avg_accuracy_neg = 0, 0, 0
    decay = 0.99
    vocab_size = 8226 if dataset == 'referit' else 21692
    emb_name = 'referit' if dataset == 'referit' else 'Gref'

    if pre_emb:
        print("Use pretrained Embeddings.")
        model = LSCM_model(num_steps=30, mode='train',
                                       vocab_size=vocab_size, start_lr=lr,
                                       batch_size=bs, conv5=conv5, emb_name=emb_name)
    else:
        model = LSCM_model(num_steps=30, mode='train',
                                       vocab_size=vocab_size, start_lr=lr,
                                       batch_size=bs, conv5=conv5)

    weights = './data/weights/deeplab_resnet_init.ckpt'
    load_var = {var.op.name: var for var in tf.global_variables()
                if var.name.startswith('res') or var.name.startswith('bn') or var.name.startswith('conv1')}

    snapshot_loader = tf.train.Saver(load_var)
    snapshot_saver = tf.train.Saver(max_to_keep=2)

    config = tf.ConfigProto()
    config.gpu_options.allow_growth = True
    sess = tf.Session(config=config)
    sess.run(tf.global_variables_initializer())
    snapshot_loader.restore(sess, weights)

    im_h, im_w, num_steps = model.H, model.W, model.num_steps
    text_batch = np.zeros((bs, num_steps), dtype=np.float32)
    image_batch = np.zeros((bs, im_h, im_w, 3), dtype=np.float32)
    mask_batch = np.zeros((bs, im_h, im_w, 1), dtype=np.float32)
    valid_idx_batch = np.zeros((bs, 1), dtype=np.int32)
    graph_adj_batch = np.zeros((bs, num_steps, num_steps), dtype=np.float32)
    height_batch = np.zeros((bs, 1), dtype=np.int32)

    reader = data_reader.DataReader(data_folder, data_prefix)

    # for time calculate
    last_time = time.time()
    time_avg = MovingAverage()
    for n_iter in range(max_iter):

        for n_batch in range(bs):
            batch = reader.read_batch(is_log=(n_batch == 0 and n_iter % iters_per_log == 0))
            text = batch['text_batch']
            im = batch['im_batch'].astype(np.float32)
            mask = np.expand_dims(batch['mask_batch'].astype(np.float32), axis=2)
            graph = batch['graph_batch']
            tree_height = batch['height_batch']

            if neg_num != 0.1:
                graph[graph < 0.5] = neg_num

            im = im[:, :, ::-1]
            im -= mu

            text_batch[n_batch, ...] = text
            image_batch[n_batch, ...] = im
            mask_batch[n_batch, ...] = mask
            graph_adj_batch[n_batch, ...] = graph
            height_batch[n_batch, ...] = tree_height


            for idx in range(text.shape[0]):
                if text[idx] != 0:
                    valid_idx_batch[n_batch, :] = idx
                    break

        if use_tree:
            _, cls_loss_val, lr_val, scores_val, label_val = sess.run([model.train_step,
                                                                       model.cls_loss,
                                                                       model.learning_rate,
                                                                       model.pred,
                                                                       model.target],
                                                                      feed_dict={
                                                                          model.words: text_batch,
                                                                          # np.expand_dims(text, axis=0),
                                                                          model.im: image_batch,
                                                                          # np.expand_dims(im, axis=0),
                                                                          model.target_fine: mask_batch,
                                                                          # np.expand_dims(mask, axis=0)
                                                                          model.valid_idx: valid_idx_batch,
                                                                          model.graph_adj: graph_adj_batch,
                                                                          model.tree_height: height_batch
                                                                      })
        else:
            _, cls_loss_val, lr_val, scores_val, label_val = sess.run([model.train_step,
                                                                       model.cls_loss,
                                                                       model.learning_rate,
                                                                       model.pred,
                                                                       model.target],
                                                                      feed_dict={
                                                                          model.words: text_batch,
                                                                          # np.expand_dims(text, axis=0),
                                                                          model.im: image_batch,
                                                                          # np.expand_dims(im, axis=0),
                                                                          model.target_fine: mask_batch,
                                                                          # np.expand_dims(mask, axis=0)
                                                                          model.valid_idx: valid_idx_batch
                                                                      })
        cls_loss_avg = decay * cls_loss_avg + (1 - decay) * cls_loss_val

        # Accuracy
        accuracy_all, accuracy_pos, accuracy_neg = compute_accuracy(scores_val, label_val)
        avg_accuracy_all = decay * avg_accuracy_all + (1 - decay) * accuracy_all
        avg_accuracy_pos = decay * avg_accuracy_pos + (1 - decay) * accuracy_pos
        avg_accuracy_neg = decay * avg_accuracy_neg + (1 - decay) * accuracy_neg

        # timing
        cur_time = time.time()
        elapsed = cur_time - last_time
        last_time = cur_time

        if n_iter % iters_per_log == 0:
            print('iter = %d, loss (cur) = %f, loss (avg) = %f, lr = %f'
                  % (n_iter, cls_loss_val, cls_loss_avg, lr_val))
            print('iter = %d, accuracy (cur) = %f (all), %f (pos), %f (neg)'
                  % (n_iter, accuracy_all, accuracy_pos, accuracy_neg))
            print('iter = %d, accuracy (avg) = %f (all), %f (pos), %f (neg)'
                  % (n_iter, avg_accuracy_all, avg_accuracy_pos, avg_accuracy_neg))
            time_avg.add(elapsed)
            print('iter = %d, cur time = %.5f, avg time = %.5f' % (n_iter, elapsed, time_avg.get_avg()))

        # Save snapshot
        if (n_iter + 1) % snapshot == 0 or (n_iter + 1) >= max_iter:
            snapshot_saver.save(sess, snapshot_file % (n_iter + 1))
            print('snapshot saved to ' + snapshot_file % (n_iter + 1))
        if (n_iter + 1) >= stop_iter:
            print('stop training at iter ' + str(stop_iter))
            break

    print('Optimization done.')


def test(iter, dataset, visualize, setname, dcrf, mu, tfmodel_folder,
         pre_emb=False, use_tree=False, neg_num=0.1):
    data_folder = './' + dataset + '/' + setname + '_batch/'
    data_prefix = dataset + '_' + setname
    if visualize:
        save_dir = './' + dataset + '/visualization/' + str(iter) + '/'
        if not os.path.isdir(save_dir):
            os.makedirs(save_dir)
    weights = os.path.join(tfmodel_folder, dataset + '_iter_' + str(iter) + '.tfmodel')

    score_thresh = 1e-9
    eval_seg_iou_list = [.5, .6, .7, .8, .9]
    cum_I, cum_U = 0, 0
    mean_IoU, mean_dcrf_IoU = 0, 0
    seg_correct = np.zeros(len(eval_seg_iou_list), dtype=np.int32)
    if dcrf:
        cum_I_dcrf, cum_U_dcrf = 0, 0
        seg_correct_dcrf = np.zeros(len(eval_seg_iou_list), dtype=np.int32)
    seg_total = 0.
    H, W = 320, 320
    vocab_size = 8226 if dataset == 'referit' else 21692
    emb_name = 'referit' if dataset == 'referit' else 'Gref'

    IU_result = list()

    if pre_emb:
        # use pretrained embbeding
        print("Use pretrained Embeddings.")
        model = LSCM_model(num_steps=30, H=H, W=W,
                                       mode='eval', vocab_size=vocab_size, emb_name=emb_name)
    else:
        model = LSCM_model(num_steps=30, H=H, W=W,
                                       mode='eval', vocab_size=vocab_size)

    # Load pretrained model
    snapshot_restorer = tf.train.Saver()
    config = tf.ConfigProto()
    config.gpu_options.allow_growth = True
    sess = tf.Session(config=config)
    sess.run(tf.global_variables_initializer())
    snapshot_restorer.restore(sess, weights)
    reader = data_reader.DataReader(data_folder, data_prefix, shuffle=False)

    NN = reader.num_batch
    for n_iter in range(reader.num_batch):

        if n_iter % (NN // 50) == 0:
            if n_iter / (NN // 50) % 5 == 0:
                sys.stdout.write(str(n_iter / (NN // 50) // 5))
            else:
                sys.stdout.write('.')
            sys.stdout.flush()

        batch = reader.read_batch(is_log=False)
        text = batch['text_batch']
        im = batch['im_batch']
        mask = batch['mask_batch'].astype(np.float32)
        valid_idx = np.zeros([1], dtype=np.int32)
        graph = batch['graph_batch']
        height = batch['height_batch']
        for idx in range(text.shape[0]):
            if text[idx] != 0:
                valid_idx[0] = idx
                break

        if neg_num != 0.1:
            graph[graph < 0.5] = neg_num

        proc_im = skimage.img_as_ubyte(im_processing.resize_and_pad(im, H, W))
        proc_im_ = proc_im.astype(np.float32)
        proc_im_ = proc_im_[:, :, ::-1]
        proc_im_ -= mu

        if use_tree:
            scores_val, up_val, sigm_val = sess.run([model.pred, model.up, model.sigm],
                                                    feed_dict={
                                                        model.words: np.expand_dims(text, axis=0),
                                                        model.im: np.expand_dims(proc_im_, axis=0),
                                                        model.valid_idx: np.expand_dims(valid_idx, axis=0),
                                                        model.graph_adj: np.expand_dims(graph, axis=0),
                                                        model.tree_height: np.expand_dims(height, axis=0)
                                                    })
        else:
            scores_val, up_val, sigm_val = sess.run([model.pred, model.up, model.sigm],
                                                    feed_dict={
                                                        model.words: np.expand_dims(text, axis=0),
                                                        model.im: np.expand_dims(proc_im_, axis=0),
                                                        model.valid_idx: np.expand_dims(valid_idx, axis=0)
                                                    })

        # scores_val = np.squeeze(scores_val)
        # pred_raw = (scores_val >= score_thresh).astype(np.float32)
        up_val = np.squeeze(up_val)
        pred_raw = (up_val >= score_thresh).astype(np.float32)
        predicts = im_processing.resize_and_crop(pred_raw, mask.shape[0], mask.shape[1])
        if dcrf:
            # Dense CRF post-processing
            sigm_val = np.squeeze(sigm_val)
            d = densecrf.DenseCRF2D(W, H, 2)
            U = np.expand_dims(-np.log(sigm_val), axis=0)
            U_ = np.expand_dims(-np.log(1 - sigm_val), axis=0)
            unary = np.concatenate((U_, U), axis=0)
            unary = unary.reshape((2, -1))
            d.setUnaryEnergy(unary)
            d.addPairwiseGaussian(sxy=3, compat=3)
            d.addPairwiseBilateral(sxy=20, srgb=3, rgbim=proc_im, compat=10)
            Q = d.inference(5)
            pred_raw_dcrf = np.argmax(Q, axis=0).reshape((H, W)).astype(np.float32)
            predicts_dcrf = im_processing.resize_and_crop(pred_raw_dcrf, mask.shape[0], mask.shape[1])

        if visualize:
            sent = batch['sent_batch'][0]
            visualize_seg(im, mask, predicts, sent)
            if dcrf:
                visualize_seg(im, mask, predicts_dcrf, sent)

        I, U = eval_tools.compute_mask_IU(predicts, mask)
        IU_result.append({'batch_no': n_iter, 'I': I, 'U': U})
        mean_IoU += float(I) / U
        cum_I += I
        cum_U += U
        msg = 'cumulative IoU = %f' % (cum_I / cum_U)
        for n_eval_iou in range(len(eval_seg_iou_list)):
            eval_seg_iou = eval_seg_iou_list[n_eval_iou]
            seg_correct[n_eval_iou] += (I / U >= eval_seg_iou)
        if dcrf:
            I_dcrf, U_dcrf = eval_tools.compute_mask_IU(predicts_dcrf, mask)
            mean_dcrf_IoU += float(I_dcrf) / U_dcrf
            cum_I_dcrf += I_dcrf
            cum_U_dcrf += U_dcrf
            msg += '\tcumulative IoU (dcrf) = %f' % (cum_I_dcrf / cum_U_dcrf)
            for n_eval_iou in range(len(eval_seg_iou_list)):
                eval_seg_iou = eval_seg_iou_list[n_eval_iou]
                seg_correct_dcrf[n_eval_iou] += (I_dcrf / U_dcrf >= eval_seg_iou)
        # print(msg)
        seg_total += 1

    # Print results
    print('Segmentation evaluation (without DenseCRF):')
    result_str = ''
    for n_eval_iou in range(len(eval_seg_iou_list)):
        result_str += 'precision@%s = %f\n' % \
                      (str(eval_seg_iou_list[n_eval_iou]), seg_correct[n_eval_iou] / seg_total)
    result_str += 'overall IoU = %f; mean IoU = %f\n' % (cum_I / cum_U, mean_IoU / seg_total)
    print(result_str)
    if dcrf:
        print('Segmentation evaluation (with DenseCRF):')
        result_str = ''
        for n_eval_iou in range(len(eval_seg_iou_list)):
            result_str += 'precision@%s = %f\n' % \
                          (str(eval_seg_iou_list[n_eval_iou]), seg_correct_dcrf[n_eval_iou] / seg_total)
        result_str += 'overall IoU = %f; mean IoU = %f\n' % (cum_I_dcrf / cum_U_dcrf, mean_dcrf_IoU / seg_total)
        print(result_str)


def visualize_seg(im, mask, predicts, sent):
    # print("visualizing")
    vis_dir = "./visualize/lscm_model/unc/testA"
    sent_dir = os.path.join(vis_dir, sent)
    if not os.path.exists(sent_dir):
        os.makedirs(sent_dir)

    # Ignore sio warnings of low-contrast image.
    import warnings
    warnings.filterwarnings('ignore')

    sio.imsave(os.path.join(sent_dir, "im.png"), im)

    im_gt = np.zeros_like(im)
    im_gt[:, :, 2] = 170
    im_gt[:, :, 0] += mask.astype('uint8') * 170
    im_gt = im_gt.astype('int16')
    im_gt[:, :, 2] += mask.astype('int16') * (-170)
    im_gt = im_gt.astype('uint8')
    sio.imsave(os.path.join(sent_dir, "gt.png"), im_gt)

    im_seg = im / 2
    im_seg[:, :, 0] += predicts.astype('uint8') * 100
    im_seg = im_seg.astype('uint8')
    sio.imsave(os.path.join(sent_dir, "pred.png"), im_seg)

    # plt.imshow(im_seg.astype('uint8'))
    # plt.title(sent)
    # plt.show()


if __name__ == "__main__":
    parser = argparse.ArgumentParser()
    parser.add_argument('-g', type=str, default='0')
    parser.add_argument('-i', type=int, default=800000)
    parser.add_argument('-s', type=int, default=100000)
    parser.add_argument('-st', type=int, default=700000)  # stop training when get st iters
    parser.add_argument('-m', type=str)  # 'train' 'test'
    parser.add_argument('-d', type=str, default='referit')  # 'Gref' 'unc' 'unc+' 'referit'
    parser.add_argument('-t', type=str)  # 'train' 'trainval' 'val' 'test' 'testA' 'testB'
    parser.add_argument('-f', type=str)  # directory to save models
    parser.add_argument('-lr', type=float, default=0.00025)  # start learning rate
    parser.add_argument('-bs', type=int, default=1)  # batch size
    parser.add_argument('-v', default=False, action='store_true')  # visualization
    parser.add_argument('-c', default=True, action='store_true')  # whether or not apply DenseCRF
    parser.add_argument('-emb', default=True, action='store_true')  # whether or not use Pretrained Embeddings
    parser.add_argument('-tree', default=True, action='store_true')  # whether or not use dependency tree
    parser.add_argument('-neg', type=float, default=0.1)  # whether or not use hard graph adj
    parser.add_argument('-conv5', default=False, action='store_true')  # finetune conv layers


    args = parser.parse_args()
    # os.environ['CUDA_VISIBLE_DEVICES'] = args.g
    mu = np.array((104.00698793, 116.66876762, 122.67891434))

    if args.m == 'train':
        train(max_iter=args.i,
              snapshot=args.s,
              dataset=args.d,
              setname=args.t,
              mu=mu,
              lr=args.lr,
              bs=args.bs,
              tfmodel_folder=args.f,
              conv5=args.conv5,
              stop_iter=args.st,
              pre_emb=args.emb,
              use_tree=args.tree,
              neg_num=args.neg)
    elif args.m == 'test':
        test(iter=args.i,
             dataset=args.d,
             visualize=args.v,
             setname=args.t,
             dcrf=args.c,
             mu=mu,
             tfmodel_folder=args.f,
             pre_emb=args.emb,
             use_tree=args.tree,
             neg_num=args.neg)
