# Supplementary material
Source: ML conference proceedings conference paper supplement (https://www.ecva.net/papers/eccv_2020/papers_ECCV/html/123550052_ECCV_2020_paper.php)
Supplement: Supplementary file 4 [file 123550052-supp.zip › code_of_lscm/util/functions.py]

import math
from collections import deque

class MovingAverage():
    """ Keeps an average window of the specified number of items. """

    def __init__(self, max_window_size=1000):
        self.max_window_size = max_window_size
        self.reset()

    def add(self, elem):
        """ Adds an element to the window, removing the earliest element if necessary. """
        if elem > 999999999999:
            print('Warning: Moving average ignored a value of %f' % elem)
            return

        self.window.append(elem)
        self.sum += elem

        if len(self.window) > self.max_window_size:
            self.sum -= self.window.popleft()

    def append(self, elem):
        """ Same as add just more pythonic. """
        self.add(elem)

    def reset(self):
        """ Resets the MovingAverage to its initial state. """
        self.window = deque()
        self.sum = 0

    def get_avg(self):
        """ Returns the average of the elements in the window. """
        return self.sum / max(len(self.window), 1)

    def __str__(self):
        return str(self.get_avg())

    def __repr__(self):
        return repr(self.get_avg())
