# Supplementary material
Source: ML conference proceedings conference paper supplement (https://www.ecva.net/papers/eccv_2020/papers_ECCV/html/123550052_ECCV_2020_paper.php)
Supplement: Supplementary file 4 [file 123550052-supp.zip › code_of_lscm/util/io.py]

# -*- coding: utf-8 -*-

import json
import scipy.io as sio

def load_str_list(filename):
    with open(filename, 'r') as f:
        str_list = f.readlines()
    str_list = [s[:-1] for s in str_list]
    return str_list

def save_str_list(str_list, filename):
    str_list = [s+'\n' for s in str_list]
    with open(filename, 'w') as f:
        f.writelines(str_list)

def load_json(filename):
    with open(filename, 'r') as f:
        return json.load(f)

def save_json(json_obj, filename):
    with open(filename, 'w') as f:
        json.dump(json_obj, f, separators=(',\n', ':\n'))

def load_referit_gt_mask(mask_path):
    mat = sio.loadmat(mask_path)
    mask = (mat['segimg_t'] == 0)
    return mask

def load_proposal_mask(mask_path):
    mat = sio.loadmat(mask_path)
    mask = mat['mask']
    return mask.transpose((2, 0, 1))
