# Supplementary material
Source: ML conference proceedings conference paper supplement (https://www.ecva.net/papers/eccv_2020/papers_ECCV/html/123550052_ECCV_2020_paper.php)
Supplement: Supplementary file 4 [file 123550052-supp.zip › code_of_lscm/util/nms.pyx]

import numpy as np
cimport numpy as np

cdef inline np.float32_t max(np.float32_t a, np.float32_t b):
    return a if a >= b else b

cdef inline np.float32_t min(np.float32_t a, np.float32_t b):
    return a if a <= b else b

def cpu_nms(np.ndarray[np.float32_t, ndim=2] dets,
        np.ndarray[np.float32_t, ndim=1] scores, np.float thresh):
    cdef np.ndarray[np.float32_t, ndim=1] x1 = dets[:, 0]
    cdef np.ndarray[np.float32_t, ndim=1] y1 = dets[:, 1]
    cdef np.ndarray[np.float32_t, ndim=1] x2 = dets[:, 2]
    cdef np.ndarray[np.float32_t, ndim=1] y2 = dets[:, 3]

    cdef np.ndarray[np.float32_t, ndim=1] areas = (x2 - x1 + 1) * (y2 - y1 + 1)
    cdef np.ndarray[np.int_t, ndim=1] order = scores.argsort()[::-1]

    cdef int ndets = dets.shape[0]
    cdef np.ndarray[np.int_t, ndim=1] suppressed = \
            np.zeros((ndets), dtype=np.int)

    # nominal indices
    cdef int _i, _j
    # sorted indices
    cdef int i, j
    # temp variables for box i's (the box currently under consideration)
    cdef np.float32_t ix1, iy1, ix2, iy2, iarea
    # variables for computing overlap with box j (lower scoring box)
    cdef np.float32_t xx1, yy1, xx2, yy2
    cdef np.float32_t w, h
    cdef np.float32_t inter, ovr

    keep = []
    for _i in range(ndets):
        i = order[_i]
        if suppressed[i] == 1:
            continue
        keep.append(i)
        ix1 = x1[i]
        iy1 = y1[i]
        ix2 = x2[i]
        iy2 = y2[i]
        iarea = areas[i]
        for _j in range(_i + 1, ndets):
            j = order[_j]
            if suppressed[j] == 1:
                continue
            xx1 = max(ix1, x1[j])
            yy1 = max(iy1, y1[j])
            xx2 = min(ix2, x2[j])
            yy2 = min(iy2, y2[j])
            w = max(0.0, xx2 - xx1 + 1)
            h = max(0.0, yy2 - yy1 + 1)
            inter = w * h
            ovr = inter / (iarea + areas[j] - inter)
            if ovr >= thresh:
                suppressed[j] = 1

    return keep
